# Supplementary material for: Multi-omics and molecular testing: A new insight into the genetic mechanisms of primary biliary cholestasis and sarcopenia
Source: Research Square preprint supplement (doi:10.21203/rs.3.rs-7113071/v1), 2025-08-07
Supplement: Supplementary file 1 [file d133237ada1fd00d73d563b3.xlsx]

## Sheet: Supplementary Table S1
Supplementary Table S1 Identified bivariate regions using the LAVA method.
locus	chr	start	stop	n.snps	n.pcs	phen1	phen2	rho	rho.lower	rho.upper	r2	r2.lower	r2.upper	p
301	2	105120579	106546524	645	172	PBC	UWP	0.583755	0.26118	0.97333	0.34077	0.06821	0.94737	0.000815003
438	3	16084006	17182494	520	159	PBC	UWP	-0.243803	-0.64296	0.13819	0.0594397	0	0.4134	0.193101
431	3	8664893	9970731	671	220	PBC	UWP	0.106508	-0.25342	0.47596	0.011344	0	0.2309	0.545628
692	4	102544804	104384534	601	125	PBC	UWP	0.0861759	-0.28602	0.46234	0.00742628	0	0.22059	0.631958
26	1	23907046	25885138	646	184	PBC	UWP	-0.0348241	-0.40582	0.32591	0.00121272	0	0.18772	0.842586
212	2	7966710	8978798	390	137	PBC	UWP	-0.0353476	-0.46071	0.37838	0.00124945	0	0.24621	0.855722
581	3	183203156	184524268	564	174	PBC	ALM	0.591574	0.3048	0.95862	0.34996	0.0929	0.91896	0.000209002
221	2	15721704	17241115	639	186	PBC	ALM	-0.431949	-0.77224	-0.13469	0.18658	0.01827	0.59635	0.00547062
445	3	24270190	25516193	654	200	PBC	ALM	-0.330715	-0.60622	-0.06422	0.109372	0.00465	0.3675	0.0164019
374	2	191051955	193033982	620	165	PBC	ALM	-0.299358	-0.602	-0.01317	0.0896155	0.00142	0.3624	0.0412578
26	1	23907046	25885138	646	184	PBC	ALM	-0.275712	-0.56934	-0.00447	0.0760173	0.00081	0.32415	0.0466138
388	2	210842458	212520453	623	156	PBC	ALM	-0.213158	-0.5885	0.13945	0.0454362	0	0.3468	0.22349
210	2	6306607	7108208	410	126	PBC	ALM	0.180777	-0.2122	0.59648	0.0326804	0	0.35584	0.353535
431	3	8664893	9970731	671	220	PBC	ALM	0.0529091	-0.28234	0.39529	0.00279937	0	0.16681	0.744835
301	2	105120579	106546524	645	172	PBC	ALM	0.037664	-0.33699	0.42902	0.00141858	0	0.20458	0.83636
212	2	7966710	8978798	390	137	PBC	ALM	-0.00189592	-0.39859	0.37796	3.59451e-06	0	0.20323	0.991937
374	2	191051955	193033982	620	165	PBC	LFPL	0.327725	0.04766	0.61721	0.107404	0.0031	0.38095	0.0214207
58	1	67761891	68633860	429	121	PBC	LFPL	-0.253571	-0.53623	0.01356	0.0642983	0	0.28754	0.0700311
388	2	210842458	212520453	623	156	PBC	LFPL	0.27247	-0.04677	0.61681	0.0742401	0	0.38046	0.0901142
581	3	183203156	184524268	564	174	PBC	LFPL	-0.275128	-0.62882	0.04871	0.0756956	0	0.39542	0.0927739
26	1	23907046	25885138	646	184	PBC	LFPL	-0.204527	-0.58617	0.14427	0.0418315	0	0.3436	0.243968
212	2	7966710	8978798	390	137	PBC	LFPL	0.19801	-0.18945	0.61997	0.039208	0	0.38665	0.304592
431	3	8664893	9970731	671	220	PBC	LFPL	0.139631	-0.15611	0.45065	0.0194969	0	0.20308	0.349939
692	4	102544804	104384534	601	125	PBC	LFPL	0.150227	-0.20117	0.50406	0.0225682	0	0.25412	0.376374
445	3	24270190	25516193	654	200	PBC	LFPL	0.0998395	-0.19231	0.39086	0.00996793	0	0.15381	0.48821
301	2	105120579	106546524	645	172	PBC	LFPL	-0.0934646	-0.40094	0.20757	0.00873564	0	0.16254	0.530777
528	3	122340833	123518507	441	118	PBC	LFPL	0.069734	-0.28589	0.42537	0.00486283	0	0.18918	0.687374
404	2	227557842	228812485	531	141	PBC	LFPL	-0.0562254	-0.41238	0.28701	0.0031613	0	0.1794	0.740078
221	2	15721704	17241115	639	186	PBC	LFPL	0.0484817	-0.27792	0.38041	0.00235048	0	0.15324	0.76075
438	3	16084006	17182494	520	159	PBC	LFPL	-0.0320683	-0.45535	0.38258	0.00102838	0	0.24373	0.872457
374	2	191051955	193033982	620	165	PBC	LFPR	0.311329	0.04011	0.61383	0.0969259	0.00287	0.37678	0.02983
58	1	67761891	68633860	429	121	PBC	LFPR	-0.271278	-0.54834	-0.00717	0.073592	0.00105	0.30068	0.0493375
388	2	210842458	212520453	623	156	PBC	LFPR	0.30121	-0.00886	0.63711	0.0907275	0	0.4059	0.0603664
581	3	183203156	184524268	564	174	PBC	LFPR	-0.306923	-0.66703	0.01702	0.0942015	0	0.44493	0.0645926
212	2	7966710	8978798	390	137	PBC	LFPR	0.283197	-0.11324	0.71918	0.0802007	0	0.51747	0.154868
692	4	102544804	104384534	601	125	PBC	LFPR	0.152667	-0.19023	0.52069	0.0233072	0	0.27125	0.376252
26	1	23907046	25885138	646	184	PBC	LFPR	-0.134634	-0.49355	0.21242	0.0181262	0	0.24812	0.430993
445	3	24270190	25516193	654	200	PBC	LFPR	0.0886902	-0.19489	0.3794	0.00786596	0	0.14648	0.531558
301	2	105120579	106546524	645	172	PBC	LFPR	-0.0850138	-0.38528	0.20521	0.00722734	0	0.15145	0.560077
431	3	8664893	9970731	671	220	PBC	LFPR	0.0829081	-0.21215	0.39326	0.00687376	0	0.15575	0.574455
221	2	15721704	17241115	639	186	PBC	LFPR	0.0745869	-0.23065	0.39617	0.00556321	0	0.15846	0.62628
528	3	122340833	123518507	441	118	PBC	LFPR	0.0543202	-0.2941	0.41616	0.00295068	0	0.18412	0.754111
404	2	227557842	228812485	531	141	PBC	LFPR	0.00957693	-0.36602	0.39033	9.17175e-05	0	0.19795	0.958399
581	3	183203156	184524268	564	174	PBC	HGSL	0.373272	-0.01725	0.81414	0.139332	0	0.66282	0.0067929
374	2	191051955	193033982	620	165	PBC	HGSL	-0.300097	-0.64106	0.00553	0.0900585	0	0.41096	0.0569019
404	2	227557842	228812485	531	141	PBC	HGSL	-0.272216	-0.6413	0.06773	0.0741018	0	0.41126	0.109552
388	2	210842458	212520453	623	156	PBC	HGSL	-0.276968	-0.68288	0.09998	0.0767112	0	0.46632	0.13614
221	2	15721704	17241115	639	186	PBC	HGSL	-0.220957	-0.56161	0.10626	0.0488219	0	0.3154	0.176743
431	3	8664893	9970731	671	220	PBC	HGSL	-0.212795	-0.61477	0.15013	0.0452815	0	0.37794	0.238819
26	1	23907046	25885138	646	184	PBC	HGSL	0.204429	-0.20112	0.64041	0.0417913	0	0.41012	0.303641
301	2	105120579	106546524	645	172	PBC	HGSL	0.179031	-0.17385	0.54517	0.0320521	0	0.29721	0.306488
692	4	102544804	104384534	601	125	PBC	HGSL	-0.0872556	-0.45407	0.2535	0.00761353	0	0.21595	0.602205
58	1	67761891	68633860	429	121	PBC	HGSL	-0.0126006	-0.28774	0.27012	0.000158776	0	0.09921	0.928582
374	2	191051955	193033982	620	165	PBC	HGSR	-0.372537	-0.71558	-0.06823	0.138784	0.00575	0.51205	0.0193381
388	2	210842458	212520453	623	156	PBC	HGSR	-0.336214	-0.68457	-0.01689	0.11304	0.00169	0.46864	0.0420081
221	2	15721704	17241115	639	186	PBC	HGSR	-0.328474	-0.69719	0.01227	0.107895	0	0.48608	0.0604378
404	2	227557842	228812485	531	141	PBC	HGSR	-0.285209	-0.64752	0.04441	0.0813443	0	0.41928	0.094941
581	3	183203156	184524268	564	174	PBC	HGSR	0.257261	-0.10593	0.66514	0.0661832	0	0.44241	0.160048
692	4	102544804	104384534	601	125	PBC	HGSR	-0.183184	-0.56821	0.18026	0.0335564	0	0.32287	0.308566
301	2	105120579	106546524	645	172	PBC	HGSR	0.042062	-0.30906	0.39332	0.00176921	0	0.17213	0.803883
374	2	191051955	193033982	620	165	PBC	AFPL	0.477949	0.1876	0.80408	0.228436	0.03519	0.64655	0.00191643
26	1	23907046	25885138	646	184	PBC	AFPL	-0.418029	-0.86182	-0.0464	0.174749	0.00409	0.74273	0.0300847
431	3	8664893	9970731	671	220	PBC	AFPL	0.249656	-0.01846	0.53995	0.062328	0	0.29154	0.0686385
210	2	6306607	7108208	410	126	PBC	AFPL	-0.305489	-0.78608	0.1123	0.0933238	0	0.61793	0.144527
692	4	102544804	104384534	601	125	PBC	AFPL	0.186965	-0.12858	0.51778	0.034956	0	0.2681	0.228437
212	2	7966710	8978798	390	137	PBC	AFPL	0.216577	-0.14755	0.59657	0.0469055	0	0.35628	0.238264
388	2	210842458	212520453	623	156	PBC	AFPL	0.178603	-0.19085	0.56439	0.031899	0	0.3186	0.32032
221	2	15721704	17241115	639	186	PBC	AFPL	-0.154215	-0.5079	0.19016	0.0237823	0	0.25807	0.357768
301	2	105120579	106546524	645	172	PBC	AFPL	-0.104225	-0.41336	0.18536	0.0108628	0	0.1725	0.476675
404	2	227557842	228812485	531	141	PBC	AFPL	0.111809	-0.22969	0.4729	0.0125013	0	0.22643	0.513124
581	3	183203156	184524268	564	174	PBC	AFPL	-0.0933234	-0.42311	0.21884	0.00870926	0	0.18306	0.550506
528	3	122340833	123518507	441	118	PBC	AFPL	0.0306386	-0.3171	0.37628	0.000938721	0	0.16182	0.855514
445	3	24270190	25516193	654	200	PBC	AFPL	-0.0220025	-0.27201	0.22679	0.00048411	0	0.08332	0.859651
233	2	30575620	31457418	476	134	PBC	AFPL	-0.00508633	-0.4344	0.41326	2.58707e-05	0	0.23589	0.979783
374	2	191051955	193033982	620	165	PBC	AFPR	0.503537	0.2259	0.82838	0.25355	0.05103	0.68621	0.000904365
431	3	8664893	9970731	671	220	PBC	AFPR	0.264264	-0.00433	0.54227	0.0698355	0	0.29406	0.0517706
26	1	23907046	25885138	646	184	PBC	AFPR	-0.334069	-0.73815	0.02274	0.111602	0	0.54487	0.0672172
210	2	6306607	7108208	410	126	PBC	AFPR	-0.311592	-0.77808	0.08564	0.0970897	0	0.60542	0.122933
212	2	7966710	8978798	390	137	PBC	AFPR	0.279177	-0.08969	0.6804	0.0779397	0	0.46295	0.136997
301	2	105120579	106546524	645	172	PBC	AFPR	-0.123629	-0.4244	0.16537	0.0152841	0	0.18011	0.393105
692	4	102544804	104384534	601	125	PBC	AFPR	0.129573	-0.18762	0.4656	0.0167893	0	0.21839	0.414942
388	2	210842458	212520453	623	156	PBC	AFPR	0.142473	-0.2244	0.51273	0.0202986	0	0.26303	0.41865
221	2	15721704	17241115	639	186	PBC	AFPR	-0.122756	-0.45466	0.20408	0.0150691	0	0.20718	0.453399
404	2	227557842	228812485	531	141	PBC	AFPR	0.10532	-0.24839	0.46317	0.0110923	0	0.21641	0.540212
528	3	122340833	123518507	441	118	PBC	AFPR	0.0530915	-0.2837	0.40363	0.0028187	0	0.17552	0.752904
581	3	183203156	184524268	564	174	PBC	AFPR	-0.0295666	-0.35379	0.28573	0.000874185	0	0.14066	0.848458
233	2	30575620	31457418	476	134	PBC	AFPR	-0.00946793	-0.403	0.394	8.96417e-05	0	0.21201	0.960437
445	3	24270190	25516193	654	200	PBC	AFPR	-0.000181835	-0.25469	0.25283	3.30638e-08	0	0.08666	0.99883

## Sheet: Supplementary Table S2
Supplementary Table S2 Using a combination of MTAG and CPASSOC methods to screen for shared SNPs between PBC and ALM.
SNP	CHR_PBC	BP_PBC	A1_PBC	A2_PBC	Z_PBC	N_PBC	FRQ_PBC	mtag_beta_PBC	mtag_se_PBC	mtag_z_PBC	mtag_pval_PBC	CHR_ALM	BP_ALM	A1_ALM	A2_ALM	Z_ALM	N_ALM	FRQ_ALM	mtag_beta_ALM	mtag_se_ALM	mtag_z_ALM	mtag_pval_ALM	CHR.x	BP.x	effect_allele.x	other_allele.x	beta.x	se.x	pval.x	Z.x	CHR.y	BP.y	effect_allele.y	other_allele.y	beta.y	se.y	pval.y	Z.y	p_Shet	p_Shom
rs644045	6	31883957	G	A	5.63780886242451	13239	0.24096	0.109705930693162	0.0138306315415556	7.93209842685335	2.15473548390432e-15	6	31883957	G	A	-20.3684	450243	0.6156	-0.0444785	0.00249300185914452	-17.8413	3.37602087882549e-71	6	31883957	G	A	0.199305	0.0353515	1.72234441059164e-08	5.63780886242451	6	31883957	G	A	-0.0387	0.0019	1.21004076085697e-89	-20.3684	1.10034e-98	9.74409423720624e-89
rs2523578	6	31328542	A	G	5.84883384485021	13239	0.24096	0.112363625750609	0.0138306315415556	8.12425849195682	4.50105590797539e-16	6	31328542	A	G	-20.2857	450243	0.7083	-0.047425	0.00266800575474205	-17.7754	1.09519916534259e-70	6	31328542	A	G	0.226399	0.0387084	4.95039667135599e-09	5.84883384485021	6	31328542	A	G	-0.0426	0.0021	1.7298163592151e-94	-20.2857	6.8146e-98	6.89551040908786e-88
rs437179	6	31929014	C	A	4.86682303176562	13239	0.24096	0.0990178847886097	0.0138306315415556	7.15931767042595	8.10796036533118e-13	6	31929014	C	A	-20.1	450243	0.6773	-0.0456201	0.00259402153361963	-17.5866	3.11827483383906e-69	6	31929014	C	A	0.179486	0.0368795	1.13412258735055e-06	4.86682303176562	6	31929014	C	A	-0.0402	0.002	3.78965783799467e-89	-20.1	3.98033e-96	6.76512411112137e-87
rs410851	6	31936668	C	T	4.82713028430829	13239	0.24096	0.0984056115909343	0.0138306315415556	7.11504831108138	1.11873642192794e-12	6	31936668	C	T	-20.05	450243	0.6792	-0.0455753	0.00259805044345077	-17.5421	6.83331617509445e-69	6	31936668	C	T	0.178529	0.0369845	1.38522397637719e-06	4.82713028430829	6	31936668	C	T	-0.0401	0.002	1.28115005627841e-88	-20.05	1.18232e-95	1.71992308215719e-86
rs2247056	6	31265490	C	T	4.49645629074213	13239	0.24096	0.0940147944166095	0.0138306315415556	6.79757783541061	1.06392671920502e-11	6	31265490	C	T	-20.0476	450243	0.7024	-0.0465003	0.00265249688509561	-17.5308	8.34410196546751e-69	6	31265490	C	T	0.170788	0.0379828	6.90907647790195e-06	4.49645629074213	6	31265490	C	T	-0.0421	0.0021	3.87971657293696e-93	-20.0476	1.24515e-95	1.1247710096315e-86
rs6457374	6	31272261	T	C	4.48733397882507	13239	0.24096	0.0938121512800068	0.0138306315415556	6.78292607232996	1.17765908111433e-11	6	31272261	T	C	-20	450243	0.7001	-0.0462876	0.00264664276567404	-17.4892	1.73272003538938e-68	6	31272261	T	C	0.170551	0.0380072	7.21173898694865e-06	4.48733397882507	6	31272261	T	C	-0.042	0.0021	2.88004981744287e-93	-20	3.50249e-95	2.84618265547492e-86
rs419788	6	31928799	C	T	4.85043627272875	13239	0.24096	0.0986290824180138	0.0138306315415556	7.1312059844608	9.94932920655172e-13	6	31928799	C	T	-20	450243	0.6773	-0.0453937	0.00259402153361963	-17.4994	1.44877707125771e-68	6	31928799	C	T	0.178887	0.0368806	1.23182779698901e-06	4.85043627272875	6	31928799	C	T	-0.04	0.002	2.18725793121132e-88	-20	3.50249e-95	4.77196415678821e-86
rs630379	6	31922254	C	A	4.74899908434007	13239	0.24096	0.097197704727983	0.0138306315415556	7.02771268513241	2.0994664540375e-12	6	31922254	C	A	-19.95	450243	0.6821	-0.0454535	0.00260431977568395	-17.4531	3.26004421490227e-68	6	31922254	C	A	0.176857	0.0372409	2.0444194309269e-06	4.74899908434007	6	31922254	C	A	-0.0399	0.002	2.89067988236547e-87	-19.95	1.03477e-94	1.10626271527382e-85
rs389883	6	31947460	T	G	4.80625883040746	13239	0.24096	0.0978716076101825	0.0138306315415556	7.07643807270237	1.4790680320167e-12	6	31947460	T	G	-19.9	450243	0.6788	-0.0452206	0.00259719711827558	-17.4113	6.77192815109839e-68	6	31947460	T	G	0.177573	0.0369462	1.53787132784224e-06	4.80625883040746	6	31947460	T	G	-0.0398	0.002	1.9819833417975e-87	-19.9	3.04881e-94	3.20481726834731e-85
rs440454	6	31927342	G	A	4.84757767545786	13239	0.24096	0.0983340377923583	0.0138306315415556	7.10987329081127	1.16149539324915e-12	6	31927342	G	A	-19.85	450243	0.6766	-0.0450302	0.00259255269815636	-17.3691	1.41524939359952e-67	6	31927342	G	A	0.178768	0.0368778	1.24979850260639e-06	4.84757767545786	6	31927342	G	A	-0.0397	0.002	3.35660316699928e-87	-19.85	8.95864e-94	9.05120053919951e-85
rs2261033	6	31603591	G	A	6.37041629153803	13239	0.24096	0.118522549670695	0.0138306315415556	8.56956888154972	1.03873174677918e-17	6	31603591	G	A	-19.8421	450243	0.4314	-0.042618	0.00244861270967203	-17.405	7.56413228800797e-68	6	31603591	G	A	0.204491	0.0321001	1.88521115125378e-10	6.37041629153803	6	31603591	G	A	-0.0377	0.0019	7.06642900425201e-88	-19.8421	1.06181e-93	9.0014825122275e-84
rs2524074	6	31244021	A	G	4.77326008460004	13239	0.24096	0.0971767224370359	0.0138306315415556	7.02619559671284	2.12240881757834e-12	6	31244021	A	G	-19.75	450243	0.6668	-0.0444591	0.00257284311850902	-17.2802	6.63667239121861e-67	6	31244021	A	G	0.169603	0.0355319	1.81271696801441e-06	4.77326008460004	6	31244021	A	G	-0.0395	0.002	1.60694125301289e-87	-19.75	7.6725e-93	5.74299312044011e-84
rs521977	6	31836827	G	T	7.98930010336026	13239	0.24096	0.139840851988231	0.0138306315415556	10.1109520247187	4.94018574315449e-24	6	31836827	G	T	-19.75	450243	0.6802	-0.0451666	0.00260019580896218	-17.3705	1.38076619169802e-67	6	31836827	G	T	0.302999	0.0379256	1.35706296962399e-15	7.98930010336026	6	31836827	G	T	-0.0395	0.002	5.29175830420352e-86	-19.75	7.6725e-93	5.12171824278589e-82
rs7763262	6	32424882	C	T	9.61387006516011	13239	0.24096	0.161135346819325	0.0138306315415556	11.6506138085724	2.27811969639207e-31	6	32424882	C	T	-19.6	450243	0.6614	-0.0442975	0.00256264250517563	-17.2859	6.01013086404989e-67	6	32424882	C	T	0.354249	0.0368477	6.98714892561127e-22	9.61387006516011	6	32424882	C	T	-0.0392	0.002	2.2059720217473e-86	-19.6	1.88432e-91	8.4504882353512e-80
rs6937545	6	32418031	C	A	9.62200730898092	13239	0.24096	0.161157588407665	0.0138306315415556	11.6522219483217	2.23552755178572e-31	6	32418031	C	A	-19.55	450243	0.6606	-0.0441615	0.00256116992727446	-17.2427	1.26973282432378e-66	6	32418031	C	A	0.354392	0.0368314	6.45505578769005e-22	9.62200730898092	6	32418031	C	A	-0.0391	0.002	2.18725793121132e-86	-19.55	5.44765e-91	2.20423648749802e-79
rs2647012	6	32664458	C	T	6.95515659438479	13239	0.24096	0.124565591484096	0.0138306315415556	9.00650061494482	2.1273624943684e-19	6	32664458	C	T	-18.8421	450243	0.5953	-0.0408989	0.0024707514219732	-16.5532	1.51719412200633e-61	6	32664458	C	T	0.236355	0.0339827	3.52127545919222e-12	6.95515659438479	6	32664458	C	T	-0.0358	0.0019	1.18795502794164e-77	-18.8421	1.37257e-84	3.33764087031254e-75
rs2647046	6	32668336	C	A	6.89948262033264	13239	0.24096	0.123827018074644	0.0138306315415556	8.95309933625171	3.4563858219746e-19	6	32668336	C	A	-18.8421	450243	0.5974	-0.0409295	0.00247282910128799	-16.5517	1.55711806710621e-61	6	32668336	C	A	0.234837	0.0340369	5.22035455103311e-12	6.89948262033264	6	32668336	C	A	-0.0358	0.0019	9.08238693260395e-78	-18.8421	1.37257e-84	3.09974986797489e-75
rs2856725	6	32666738	T	C	6.97208975290591	13239	0.24096	0.124790227516186	0.0138306315415556	9.02274253646624	1.83438316831928e-19	6	32666738	T	C	-18.8421	450243	0.595	-0.0408953	0.00247045872863549	-16.5537	1.50525482045469e-61	6	32666738	T	C	0.236989	0.0339911	3.12248240622327e-12	6.97208975290591	6	32666738	T	C	-0.0358	0.0019	6.51628394060832e-78	-18.8421	1.37257e-84	3.41354260215867e-75
rs2858324	6	32660375	G	A	6.96040947394136	13239	0.24096	0.124635276417309	0.0138306315415556	9.01153906405713	2.03184692262784e-19	6	32660375	G	A	-18.8421	450243	0.595	-0.0408945	0.00247045872863549	-16.5534	1.51348033941779e-61	6	32660375	G	A	0.236482	0.0339753	3.39312610162932e-12	6.96040947394136	6	32660375	G	A	-0.0358	0.0019	9.62941712971546e-78	-18.8421	1.37257e-84	3.36100473592411e-75
rs2856717	6	32670308	G	A	6.87306183036698	13239	0.24096	0.123386300335415	0.0138306315415556	8.92123399894559	4.61121162748866e-19	6	32670308	G	A	-18.7895	450243	0.5973	-0.040813	0.00247272901727668	-16.5052	3.36395118438008e-61	6	32670308	G	A	0.233825	0.0340205	6.28347656984477e-12	6.87306183036698	6	32670308	G	A	-0.0357	0.0019	1.7298163592151e-77	-18.7895	4.01838e-84	7.87927052601393e-75
rs1612904	6	32669018	A	C	8.81740579985428	13239	0.24096	0.149089835317471	0.0138306315415556	10.7796838394194	4.29358944303369e-27	6	32669018	A	C	-18.7368	450243	0.6196	-0.0412519	0.00249797241850303	-16.5142	2.90213834030859e-61	6	32669018	A	C	0.311019	0.0352733	1.1716556739113e-18	8.81740579985428	6	32669018	A	C	-0.0356	0.0019	1.30707347072169e-75	-18.7368	1.17291e-83	2.6715867863069e-73
rs2647003	6	32664880	G	T	6.95544314078626	13239	0.24096	0.124388956086314	0.0138306315415556	8.99372929663941	2.38980613164773e-19	6	32664880	G	T	-18.7368	450243	0.5957	-0.0406796	0.00247114327809659	-16.4619	6.89479936936236e-61	6	32664880	G	T	0.236355	0.0339813	3.513985782354e-12	6.95544314078626	6	32664880	G	T	-0.0356	0.0019	4.58775270547143e-77	-18.7368	1.17291e-83	2.30640693487776e-74
rs2858305	6	32670464	T	G	6.87263759971313	13239	0.24096	0.123200235737688	0.0138306315415556	8.90778091857333	5.2064152451154e-19	6	32670464	T	G	-18.6842	450243	0.5977	-0.0405936	0.0024731300433672	-16.4138	1.52256228188363e-60	6	32670464	T	G	0.233825	0.0340226	6.30231345990852e-12	6.87263759971313	6	32670464	T	G	-0.0355	0.0019	2.19280493535042e-76	-18.6842	3.41331e-83	5.41307684438963e-74
rs9275596	6	32681631	T	C	8.86061182653211	13239	0.24096	0.149572790016455	0.0138306315415556	10.8146030473769	2.93560778027599e-27	6	32681631	T	C	-18.6842	450243	0.6191	-0.0411304	0.00249734020575155	-16.4697	6.05976391141287e-61	6	32681631	T	C	0.312932	0.0353172	7.95792789897093e-19	8.86061182653211	6	32681631	T	C	-0.0355	0.0019	4.77419331137076e-75	-18.6842	3.41331e-83	7.34669980962035e-73
rs2518028	6	31436047	C	T	5.37147626943934	13239	0.24096	0.102969998652979	0.0138306315415556	7.44506845863071	9.68941598664155e-14	6	31436047	C	T	-18.5	450243	0.6463	-0.0411206	0.00253646567517972	-16.2118	4.16463160613811e-59	6	31436047	C	T	0.191766	0.0357008	7.80926211486518e-08	5.37147626943934	6	31436047	C	T	-0.037	0.002	8.01308961991319e-78	-18.5	1.40152e-81	2.15995827599653e-73
rs6936204	6	32217092	C	T	4.16216569078509	13239	0.24096	0.0865212482181165	0.0138306315415556	6.2557698799331	3.9555965133645e-10	6	32217092	C	T	-18.2632	450243	0.6328	-0.0401831	0.00251581687552712	-15.9722	1.99674314522456e-57	6	32217092	C	T	0.146646	0.0352331	3.1526081939744e-05	4.16216569078509	6	32217092	C	T	-0.0347	0.0019	3.27189983623175e-71	-18.2632	1.57595e-79	3.24531475032263e-72
rs9275245	6	32660943	G	A	5.30729163440874	13239	0.24096	0.101622321416055	0.0138306315415556	7.34762697644861	2.01756605279913e-13	6	32660943	G	A	-18.2105	450243	0.4837	-0.0387276	0.00242674694314629	-15.9586	2.48040131850217e-57	6	32660943	G	A	0.171382	0.0322918	1.11270489859636e-07	5.30729163440874	6	32660943	G	A	-0.0346	0.0019	2.11982495280646e-75	-18.2105	4.46398e-79	3.68533612834582e-71
rs592229	6	31930441	T	G	3.70693199572404	13239	0.24096	0.0803016610903866	0.0138306315415556	5.80607334156156	6.39549560191784e-09	6	31930441	T	G	-18.1579	450243	0.518	-0.0385121	0.00242703030108505	-15.868	1.05529000932953e-56	6	31930441	T	G	0.121716	0.0328347	0.000209787689559333	3.70693199572404	6	31930441	T	G	-0.0345	0.0019	3.90571005693759e-75	-18.1579	1.26066e-78	1.19522757600163e-71
rs9275224	6	32659878	G	A	5.29618515869108	13239	0.24096	0.101384764048978	0.0138306315415556	7.3304508000489	2.29379830169715e-13	6	32659878	G	A	-18.1579	450243	0.484	-0.0386152	0.00242669986412541	-15.9126	5.17787559366979e-57	6	32659878	G	A	0.171026	0.0322923	1.1824968703831e-07	5.29618515869108	6	32659878	G	A	-0.0345	0.0019	3.25836701002013e-75	-18.1579	1.26066e-78	9.30761022969554e-71
rs589428	6	31848220	G	T	6.01795780251443	13239	0.24096	0.110869613591973	0.0138306315415556	8.0162365152201	1.09034457728124e-15	6	31848220	G	T	-18.1053	450243	0.6373	-0.0400743	0.00252242266705467	-15.8872	7.76942771151509e-57	6	31848220	G	T	0.215547	0.0358173	1.76624115500878e-09	6.01795780251443	6	31848220	G	T	-0.0344	0.0019	1.33198704231316e-69	-18.1053	3.54955e-78	5.99777397497934e-70
rs535586	6	31860337	C	T	6.01011087910493	13239	0.24096	0.110675297590409	0.0138306315415556	8.00218683130071	1.22228736990944e-15	6	31860337	C	T	-18.0526	450243	0.6372	-0.0399561	0.00252227290559625	-15.8413	1.61422796785335e-56	6	31860337	C	T	0.215299	0.0358228	1.85383040149281e-09	6.01011087910493	6	31860337	C	T	-0.0343	0.0019	2.55387713577934e-69	-18.0526	9.96423e-78	1.50883579280571e-69
rs659445	6	31864304	A	G	6.01568826758857	13239	0.24096	0.110749287473444	0.0138306315415556	8.0075365423976	1.17028977291665e-15	6	31864304	A	G	-18.0526	450243	0.6369	-0.0399494	0.0025218244355072	-15.8415	1.61021175980599e-56	6	31864304	A	G	0.215423	0.0358102	1.79105944393464e-09	6.01568826758857	6	31864304	A	G	-0.0343	0.0019	3.28927360480647e-69	-18.0526	9.96423e-78	1.51961263702655e-69
rs486416	6	31856070	A	G	6.01446220422978	13239	0.24096	0.110642804095011	0.0138306315415556	7.99983744506332	1.24583572653645e-15	6	31856070	A	G	-18	450243	0.6362	-0.0398176	0.00252078274683923	-15.7957	3.32865983691e-56	6	31856070	A	G	0.215423	0.0358175	1.80472070130814e-09	6.01446220422978	6	31856070	A	G	-0.0342	0.0019	4.58352917438182e-69	-18	2.78876e-77	3.84467214333958e-69
rs605203	6	31847012	A	C	5.98237263939194	13239	0.24096	0.110217102504391	0.0138306315415556	7.9690578245275	1.59888638476719e-15	6	31847012	A	C	-18	450243	0.637	-0.0398342	0.00252197378988862	-15.7948	3.37657199817354e-56	6	31847012	A	C	0.214556	0.0358647	2.19917606416774e-09	5.98237263939194	6	31847012	A	C	-0.0342	0.0019	3.9282579671628e-69	-18	2.78876e-77	3.69085867870114e-69
rs6457617	6	32663851	T	C	5.31451575443214	13239	0.24096	0.100996409972524	0.0138306315415556	7.30237152721983	2.82739239404242e-13	6	32663851	T	C	-17.7895	450243	0.479	-0.0378543	0.00242759916309904	-15.5933	8.08310949702185e-55	6	32663851	T	C	0.171619	0.0322925	1.06944880615478e-07	5.31451575443214	6	32663851	T	C	-0.0338	0.0019	3.97283016733688e-72	-17.7895	1.66053e-75	6.38829251635858e-68
rs3130320	6	32223258	C	T	4.03647098281405	13239	0.24096	0.0835907195010171	0.0138306315415556	6.04388304683411	1.50448587017633e-09	6	32223258	C	T	-17.5263	450243	0.623	-0.0383585	0.00250235487045095	-15.329	4.89780943816605e-53	6	32223258	C	T	0.139607	0.0345864	5.42612757064713e-05	4.03647098281405	6	32223258	C	T	-0.0333	0.0019	4.53523713451443e-66	-17.5263	2.56724e-73	1.25041047227013e-66
rs2213586	6	32413094	G	A	5.05603607947363	13239	0.24096	0.0970260969332985	0.0138306315415556	7.01530487901244	2.29448069677204e-12	6	32413094	G	A	-17.4737	450243	0.6036	-0.0379622	0.00247926048739499	-15.3119	6.3677645755063e-53	6	32413094	G	A	0.171975	0.0340138	4.28055419586204e-07	5.05603607947363	6	32413094	G	A	-0.0332	0.0019	8.61390345772418e-67	-17.4737	6.9727e-73	1.10169740582142e-65
rs2213585	6	32413150	A	G	5.05619959603325	13239	0.24096	0.0969380477837044	0.0138306315415556	7.00893863685425	2.40132735437812e-12	6	32413150	A	G	-17.4211	450243	0.6037	-0.0378506	0.00247936789543953	-15.2662	1.28421980428122e-52	6	32413150	A	G	0.171975	0.0340127	4.27690890299395e-07	5.05619959603325	6	32413150	A	G	-0.0331	0.0019	1.25112297692161e-66	-17.4211	1.88813e-72	2.71849989164707e-65
rs2227139	6	32413459	A	G	5.05152730094531	13239	0.24096	0.0968760649098065	0.0138306315415556	7.00445707187932	2.47945429199716e-12	6	32413459	A	G	-17.4211	450243	0.6036	-0.0378486	0.00247926048739499	-15.2661	1.28680583781112e-52	6	32413459	A	G	0.171857	0.0340208	4.38308608097123e-07	5.05152730094531	6	32413459	A	G	-0.0331	0.0019	1.14788927979018e-66	-17.4211	1.88813e-72	2.70285105517063e-65
rs7192	6	32411646	G	T	5.05448385189804	13239	0.24096	0.0969152866458969	0.0138306315415556	7.00729293197527	2.42973222295443e-12	6	32411646	G	T	-17.4211	450243	0.6037	-0.0378504	0.00247936789543953	-15.2662	1.28516883681448e-52	6	32411646	G	T	0.171857	0.0340009	4.31598572900891e-07	5.05448385189804	6	32411646	G	T	-0.0331	0.0019	1.18385905420182e-66	-17.4211	1.88813e-72	2.71274291648607e-65
rs7194	6	32412480	A	G	5.05630365753264	13239	0.24096	0.0969394282681714	0.0138306315415556	7.00903845040672	2.3996150872946e-12	6	32412480	A	G	-17.4211	450243	0.6034	-0.0378456	0.0024790460239524	-15.2662	1.2841622670145e-52	6	32412480	A	G	0.171975	0.034012	4.274349203143e-07	5.05630365753264	6	32412480	A	G	-0.0331	0.0019	2.36210935708357e-66	-17.4211	1.88813e-72	2.71884944899203e-65
rs2072633	6	31919578	G	A	4.76380487716403	13239	0.24096	0.0929689081051385	0.0138306315415556	6.72195682646908	1.79300086088374e-11	6	31919578	G	A	-17.3684	450243	0.5281	-0.0369552	0.00242929650323155	-15.2123	2.9303326874858e-52	6	31919578	G	A	0.15759	0.0330807	1.89980925925721e-06	4.76380487716403	6	31919578	G	A	-0.033	0.0019	8.20162673151548e-69	-17.3684	5.09753e-72	4.66435858165696e-65
rs7754768	6	32420179	T	C	5.09541462369686	13239	0.24096	0.0973680577127262	0.0138306315415556	7.04002976438013	1.92198771520016e-12	6	32420179	T	C	-17.3684	450243	0.5978	-0.0376466	0.00247323058754208	-15.2216	2.5416059934172e-52	6	32420179	T	C	0.171263	0.0336112	3.47984580174699e-07	5.09541462369686	6	32420179	T	C	-0.033	0.0019	4.8618325846499e-66	-17.3684	5.09753e-72	7.0191567396158e-65
rs7195	6	32412539	G	A	5.05625905922269	13239	0.24096	0.0966681815224306	0.0138306315415556	6.98942642148918	2.76012320460611e-12	6	32412539	G	A	-17.2632	450243	0.6048	-0.0375287	0.00248055715556801	-15.1291	1.04054282340697e-51	6	32412539	G	A	0.171975	0.0340123	4.27562886151586e-07	5.05625905922269	6	32412539	G	A	-0.0328	0.0019	1.0759695972077e-65	-17.2632	3.68218e-71	4.01510645469316e-64
rs9268832	6	32427789	C	T	4.42354809370177	13239	0.24096	0.0876430812143176	0.0138306315415556	6.33688208314888	2.34461288891498e-10	6	32427789	C	T	-16.8947	450243	0.6035	-0.0366704	0.00247915319691373	-14.7915	1.6616205893412e-49	6	32427789	C	T	0.149312	0.0337539	9.70867582201864e-06	4.42354809370177	6	32427789	C	T	-0.0321	0.0019	9.25976574561246e-63	-16.8947	3.39361e-68	9.13236314277493e-62
rs3096700	6	32221782	C	A	4.12454503927029	13239	0.24096	0.0835862750630393	0.0138306315415556	6.04356169939856	1.50748689004781e-09	6	32221782	C	A	-16.8421	450243	0.5912	-0.0363549	0.00246683976864072	-14.7374	3.70627941977611e-49	6	32221782	C	A	0.139952	0.0339315	3.71466796081876e-05	4.12454503927029	6	32221782	C	A	-0.032	0.0019	3.93006741341853e-63	-16.8421	8.89114e-68	1.53121796146572e-61
rs3130316	6	32221228	C	T	4.14734561852932	13239	0.24096	0.0838887485589147	0.0138306315415556	6.06543152471829	1.31599830518415e-09	6	32221228	C	T	-16.8421	450243	0.5912	-0.0363565	0.00246683976864072	-14.7381	3.67130990581612e-49	6	32221228	C	T	0.140527	0.0338836	3.36341146309514e-05	4.14734561852932	6	32221228	C	T	-0.032	0.0019	4.79954424931941e-63	-16.8421	8.89114e-68	1.57364505475079e-61
rs11624512	14	93111120	T	C	-3.92632	13239	0.24096	-0.0799417	0.0138306315415556	-5.78005	7.46801071184678e-09	14	93111120	T	C	16.25	450243	0.1904	0.0439165220150944	0.00308883618057525	14.2178216803054	7.10296897249226e-46	14	93111120	T	C	-0.167354	0.0426236	8.6252164001146e-05	-3.92632	14	93111120	T	C	0.039	0.0024	1.44910548400122e-58	16.25	3.67267e-63	1.92101790945107e-57
rs10498635	14	93103309	T	C	-3.81036	13239	0.24096	-0.0777606	0.0138306315415556	-5.62234	1.88383922585658e-08	14	93103309	T	C	15.875	450243	0.1845	0.0434234773953703	0.00312646397986799	13.889006134401	7.38529639113485e-44	14	93103309	T	C	-0.163814	0.0429917	0.000138765019167318	-3.81036	14	93103309	T	C	0.0381	0.0024	6.19441075076784e-55	15.875	2.53022e-60	6.44418439981257e-55
rs9268557	6	32389305	C	T	4.01497034554291	13239	0.24096	0.0804185033323362	0.0138306315415556	5.81452141868649	6.08075999780628e-09	6	32389305	C	T	-15.8421	450243	0.4759	-0.033671	0.00242827945375738	-13.8662	1.01521919288194e-43	6	32389305	C	T	0.13045	0.0324909	5.94511144274195e-05	4.01497034554291	6	32389305	C	T	-0.0301	0.0019	7.07782792608999e-58	-15.8421	4.4562e-60	1.35878885852554e-54
rs7146689	14	93100024	C	T	-3.68523	13239	0.24096	-0.0760291	0.0138306315415556	-5.49715	3.85970162064679e-08	14	93100024	C	T	15.8333333333333	450243	0.1846	0.0432903208337325	0.00312580869962789	13.8493186863566	1.28424394210281e-43	14	93100024	C	T	-0.157824	0.0428261	0.00022849147436171	-3.68523	14	93100024	C	T	0.038	0.0024	1.2089267852133e-54	15.8333333333333	5.18116e-60	1.07448979029207e-54
rs7774434	6	32657578	C	T	15.817211392838	13239	0.24096	0.224086330052273	0.0138306315415556	16.2021762620876	4.86736144725517e-59	6	32657578	C	T	-8.31579	450243	0.3768	-0.0191791	0.00250261721729474	-7.66362	1.80765470335711e-14	6	32657578	C	T	0.51802	0.0327504	2.36755458151767e-56	15.817211392838	6	32657578	C	T	-0.0158	0.0019	4.27070919440745e-16	-8.31579	6.83355e-60	7.04924842070693e-13
rs2524089	6	31266522	T	G	3.90470203519122	13239	0.24096	0.078775242300695	0.0138306315415556	5.69570825916418	1.22860810683335e-08	6	31266522	T	G	-15.7368	450243	0.5735	-0.0337696	0.00245209543367978	-13.7717	3.77164176347739e-43	6	31266522	T	G	0.129198	0.0330878	9.43430690367383e-05	3.90470203519122	6	31266522	T	G	-0.0299	0.0019	1.21087691616688e-55	-15.7368	2.70474e-59	6.1902343523142e-54
rs2524066	6	31269154	C	T	3.88956362010417	13239	0.24096	0.0784841970470882	0.0138306315415556	5.67466473322451	1.38960538157037e-08	6	31269154	C	T	-15.6842	450243	0.5731	-0.0336524	0.00245180155316163	-13.7256	7.13409569574214e-43	6	31269154	C	T	0.128743	0.0330996	0.000100426886819173	3.88956362010417	6	31269154	C	T	-0.0298	0.0019	2.43724955630391e-55	-15.6842	6.63365e-59	1.37672186966007e-53
rs8084	6	32411035	C	A	5.68375607446955	13239	0.24096	0.1022860337364	0.0138306315415556	7.39561555298977	1.40754695020468e-13	6	32411035	C	A	-15.6842	450243	0.5628	-0.0336798	0.00244481767366023	-13.776	3.55512485085345e-43	6	32411035	C	A	0.189709	0.0333774	1.31774082182454e-08	5.68375607446955	6	32411035	C	A	-0.0298	0.0019	1.34493098768813e-55	-15.6842	6.63365e-59	1.01244023068405e-52
rs2853922	6	31266190	G	A	3.8901512633481	13239	0.24096	0.0784017743809022	0.0138306315415556	5.66870530426146	1.43880592662066e-08	6	31266190	G	A	-15.6316	450243	0.5731	-0.0335404	0.00245180155316163	-13.6799	1.3384150276626e-42	6	31266190	G	A	0.128743	0.0330946	0.000100184376572403	3.8901512633481	6	31266190	G	A	-0.0297	0.0019	4.60999017707589e-55	-15.6316	1.62209e-58	3.10768189282952e-53
rs9268644	6	32408044	C	A	6.17382514032697	13239	0.24096	0.108697093335816	0.0138306315415556	7.85915617874884	3.86729801449e-15	6	32408044	C	A	-15.6316	450243	0.5508	-0.033509	0.00243807329688754	-13.7441	5.52917016237349e-43	6	32408044	C	A	0.208871	0.0338317	6.66545805807103e-10	6.17382514032697	6	32408044	C	A	-0.0297	0.0019	9.8627948563121e-56	-15.6316	1.62209e-58	3.89354501249818e-52
rs2243868	6	31261276	G	A	3.94807726064876	13239	0.24096	0.0790800048631407	0.0138306315415556	5.71774359150096	1.07947865650325e-08	6	31261276	G	A	-15.5789	450243	0.5731	-0.0334324	0.00245180155316163	-13.6359	2.45106662534506e-42	6	31261276	G	A	0.13045	0.0330414	7.8778915889258e-05	3.94807726064876	6	31261276	G	A	-0.0296	0.0019	8.7902251683089e-55	-15.5789	3.95453e-58	7.45489288466106e-53
rs2524040	6	31257625	C	T	3.95464256964914	13239	0.24096	0.0791671005435744	0.0138306315415556	5.72404089471318	1.04019693659004e-08	6	31257625	C	T	-15.5789	450243	0.5728	-0.0334299	0.00245158226406648	-13.636	2.44487925337598e-42	6	31257625	C	T	0.130678	0.0330442	7.66478540162591e-05	3.95464256964914	6	31257625	C	T	-0.0296	0.0019	1.36615507569041e-54	-15.5789	3.95453e-58	7.50936062234733e-53
rs2524156	6	31260397	G	A	3.94875846432798	13239	0.24096	0.0790890417413672	0.0138306315415556	5.71839698742141	1.07533675901172e-08	6	31260397	G	A	-15.5789	450243	0.5729	-0.0334305	0.00245165525369751	-13.6359	2.45042391213804e-42	6	31260397	G	A	0.13045	0.0330357	7.85524979404758e-05	3.94875846432798	6	31260397	G	A	-0.0296	0.0019	1.55704082590185e-54	-15.5789	3.95453e-58	7.46052601008853e-53
rs2844603	6	31250854	G	A	3.96374483430445	13239	0.24096	0.0792878515902648	0.0138306315415556	5.7327715912347	9.88026470931007e-09	6	31250854	G	A	-15.5789	450243	0.5728	-0.0334305	0.00245158226406648	-13.6363	2.43632666139257e-42	6	31250854	G	A	0.13102	0.0330546	7.37802291934083e-05	3.96374483430445	6	31250854	G	A	-0.0296	0.0019	1.28410341217164e-54	-15.5789	3.95453e-58	7.58553184255489e-53
rs2853933	6	31254088	C	T	3.95981681014925	13239	0.24096	0.0792357422475762	0.0138306315415556	5.72900391493359	1.01022063671987e-08	6	31254088	C	T	-15.5789	450243	0.5732	-0.0334342	0.00245187486305048	-13.6362	2.44001382143924e-42	6	31254088	C	T	0.130906	0.0330586	7.50032357674216e-05	3.95981681014925	6	31254088	C	T	-0.0296	0.0019	1.51705036745933e-54	-15.5789	3.95453e-58	7.55256672307377e-53
rs2524163	6	31259579	T	C	3.95158727516502	13239	0.24096	0.0790363505038887	0.0138306315415556	5.71458723821942	1.09970622297575e-08	6	31259579	T	C	-15.5263	450243	0.5727	-0.0333166	0.00245150938113236	-13.5903	4.57455715335091e-42	6	31259579	T	C	0.130564	0.0330409	7.76318614922828e-05	3.95158727516502	6	31259579	T	C	-0.0295	0.0019	2.48313310529559e-54	-15.5263	9.61197e-58	1.67856305489192e-52
rs2853935	6	31253878	T	C	3.96047571937277	13239	0.24096	0.0791542649990368	0.0138306315415556	5.72311284276566	1.04589745360458e-08	6	31253878	T	C	-15.5263	450243	0.5732	-0.0333222	0.00245187486305048	-13.5905	4.55898169468338e-42	6	31253878	T	C	0.130906	0.0330531	7.47980024874495e-05	3.96047571937277	6	31253878	T	C	-0.0295	0.0019	2.46320183823516e-54	-15.5263	9.61197e-58	1.69513085633738e-52
rs2524119	6	31229404	C	T	5.37199364488029	13239	0.24096	0.0974284325755843	0.0138306315415556	7.04439506488551	1.86268959948069e-12	6	31229404	C	T	-15.2632	450243	0.5476	-0.0326535	0.00243652336051359	-13.4017	5.91039830240097e-41	6	31229404	C	T	0.176499	0.0328554	7.78789343041314e-08	5.37199364488029	6	31229404	C	T	-0.029	0.0019	2.31100029012061e-53	-15.2632	7.79564e-56	4.25312238654236e-50
rs2524095	6	31266117	C	A	3.89026881330529	13239	0.24096	0.0774109317610458	0.0138306315415556	5.59706413466777	2.18012074683313e-08	6	31266117	C	A	-15.0526	450243	0.5664	-0.0322466	0.00244713167442123	-13.1773	1.18550512014095e-39	6	31266117	C	A	0.128743	0.0330936	0.000100133639153032	3.89026881330529	6	31266117	C	A	-0.0286	0.0019	6.39734835482644e-53	-15.0526	2.48673e-54	1.9939250548377e-49
rs2239805	6	32411376	G	T	-5.08607	13239	0.24096	-0.0927557	0.0138306315415556	-6.70654	1.99289656718906e-11	6	32411376	G	T	14.75	450243	0.1841	0.0405159615750687	0.0031290913111652	12.9481557251142	2.40666571595125e-38	6	32411376	G	T	-0.228659	0.0449579	3.65577955738443e-07	-5.08607	6	32411376	G	T	0.0354	0.0024	2.23202985857428e-48	14.75	3.3173e-52	5.96437462689096e-47
rs3135351	6	32392945	A	C	-4.45749	13239	0.24096	-0.0842742	0.0138306315415556	-6.0933	1.10607254266387e-09	6	32392945	A	C	14.6666666666667	450243	0.1796	0.0406234043249816	0.00315934901600917	12.8581565756531	7.74005635745255e-38	6	32392945	A	C	-0.203954	0.0457553	8.29258630251688e-06	-4.45749	6	32392945	A	C	0.0352	0.0024	9.14323748057102e-47	14.6666666666667	1.25432e-51	1.03270007416015e-46
rs3135356	6	32391516	A	G	-4.45746	13239	0.24096	-0.0842022	0.0138306315415556	-6.0881	1.14260339834971e-09	6	32391516	A	G	14.625	450243	0.1801	0.0404651793429066	0.00315592226849366	12.8219822607421	1.23502190554228e-37	6	32391516	A	G	-0.203954	0.0457557	8.29411399406636e-06	-4.45746	6	32391516	A	G	0.0351	0.0024	7.44217708924848e-47	14.625	2.43218e-51	1.88220992551787e-46
rs9275219	6	32659077	T	C	14.5484716802985	13239	0.24096	0.209752581191467	0.0138306315415556	15.1657992305877	5.95693428135601e-52	6	32659077	T	C	-9.77273	450243	0.2453	-0.025065	0.00281856236282189	-8.89284	5.95668876964222e-19	6	32659077	T	C	0.511565	0.0351628	5.97035286583841e-48	14.5484716802985	6	32659077	T	C	-0.0215	0.0022	9.87870462171178e-23	-9.77273	8.1672e-51	2.59959598781346e-18
rs2213580	6	32388574	C	T	-4.41323	13239	0.24096	-0.0834727	0.0138306315415556	-6.03535	1.58622070699959e-09	6	32388574	C	T	14.5416666666667	450243	0.1811	0.0401461963767767	0.00314911801764921	12.7483937254106	3.18234830015037e-37	6	32388574	C	T	-0.201015	0.0455483	1.01840377386687e-05	-4.41323	6	32388574	C	T	0.0349	0.0024	2.61878593654757e-46	14.5416666666667	9.09326e-51	5.94318768437234e-46
rs3135376	6	32385470	G	A	-4.38545	13239	0.24096	-0.0831042	0.0138306315415556	-6.0087	1.87011849219723e-09	6	32385470	G	A	14.5416666666667	450243	0.1811	0.0401437399045645	0.00314911801764921	12.7476136745524	3.21434605876337e-37	6	32385470	G	A	-0.199549	0.0455025	1.15744403209224e-05	-4.38545	6	32385470	G	A	0.0349	0.0024	2.36319739915402e-46	14.5416666666667	9.09326e-51	5.7752547690549e-46
rs2001097	6	32383858	T	G	-4.38493	13239	0.24096	-0.0830258	0.0138306315415556	-6.00304	1.93655623129568e-09	6	32383858	T	G	14.5	450243	0.181	0.0400383919953265	0.00314979550681249	12.7114258397823	5.10942293553188e-37	6	32383858	T	G	-0.199549	0.0455079	1.16021907135265e-05	-4.38493	6	32383858	T	G	0.0348	0.0024	4.52584837368663e-46	14.5	1.7533e-50	1.04686412385892e-45
rs2395161	6	32387752	C	A	-4.38905	13239	0.24096	-0.0830805	0.0138306315415556	-6.00699	1.88998554250894e-09	6	32387752	C	A	14.5	450243	0.181	0.0400387562256366	0.00314979550681249	12.7115414759591	5.10187221976885e-37	6	32387752	C	A	-0.199793	0.0455208	1.13841340239613e-05	-4.38905	6	32387752	C	A	0.0348	0.0024	4.46477934112996e-46	14.5	1.7533e-50	1.05130913112078e-45
rs2395162	6	32387780	T	G	-4.38943	13239	0.24096	-0.0830856	0.0138306315415556	-6.00736	1.88567939724572e-09	6	32387780	T	G	14.5	450243	0.181	0.0400387903445618	0.00314979550681249	12.7115523080671	5.10116548207344e-37	6	32387780	T	G	-0.199793	0.0455168	1.13639679446566e-05	-4.38943	6	32387780	T	G	0.0348	0.0024	4.53837104763082e-46	14.5	1.7533e-50	1.05172647373507e-45
rs2395164	6	32387860	T	C	-4.40019	13239	0.24096	-0.0832282	0.0138306315415556	-6.01767	1.76940541427296e-09	6	32387860	T	C	14.5	450243	0.1811	0.0400311293848355	0.00314911801764921	12.7118542907828	5.08150183084913e-37	6	32387860	T	C	-0.200282	0.0455167	1.08160827190481e-05	-4.40019	6	32387860	T	C	0.0348	0.0024	5.03037081084624e-46	14.5	1.7533e-50	1.06342795075878e-45
rs3135366	6	32388709	C	T	-4.41602	13239	0.24096	-0.0834383	0.0138306315415556	-6.03286	1.61079973907188e-09	6	32388709	C	T	14.5	450243	0.1811	0.040032529806809	0.00314911801764921	12.7122989937014	5.05268201174171e-37	6	32388709	C	T	-0.201137	0.0455471	1.00528684617157e-05	-4.41602	6	32388709	C	T	0.0348	0.0024	4.64408328941046e-46	14.5	1.7533e-50	1.08089592839399e-45
rs3135378	6	32385099	A	G	-4.38472	13239	0.24096	-0.083023	0.0138306315415556	-6.00284	1.93898370892946e-09	6	32385099	A	G	14.5	450243	0.181	0.0400383732447621	0.00314979550681249	12.7114198868357	5.10981194660175e-37	6	32385099	A	G	-0.199549	0.0455101	1.16134164539592e-05	-4.38472	6	32385099	A	G	0.0348	0.0024	5.34810592074829e-46	14.5	1.7533e-50	1.04663580188026e-45
rs6930571	6	32383208	T	G	-4.37459	13239	0.24096	-0.0828887	0.0138306315415556	-5.99312	2.0584887071786e-09	6	32383208	T	G	14.5	450243	0.181	0.0400374773384842	0.00314979550681249	12.7111354536793	5.12843333101611e-37	6	32383208	T	G	-0.199183	0.0455318	1.21663414267298e-05	-4.37459	6	32383208	T	G	0.0348	0.0024	4.21890746567797e-46	14.5	1.7533e-50	1.03578407924106e-45
rs6930933	6	32383410	T	G	-4.37514	13239	0.24096	-0.0828959	0.0138306315415556	-5.99365	2.0518464390871e-09	6	32383410	T	G	14.5	450243	0.181	0.0400375257879004	0.00314979550681249	12.711150835445	5.12742458847439e-37	6	32383410	T	G	-0.199183	0.0455261	1.21355649791013e-05	-4.37514	6	32383410	T	G	0.0348	0.0024	4.98081028356723e-46	14.5	1.7533e-50	1.03636805172538e-45
rs9268530	6	32383223	C	T	-4.37516	13239	0.24096	-0.0828962	0.0138306315415556	-5.99367	2.05161372647712e-09	6	32383223	C	T	14.5	450243	0.1808	0.0400547756231172	0.00315115243621313	12.711151375226	5.12738919299419e-37	6	32383223	C	T	-0.199183	0.0455259	1.21347267129239e-05	-4.37516	6	32383223	C	T	0.0348	0.0024	4.24424064429569e-46	14.5	1.7533e-50	1.03638855059277e-45
rs9274741	6	32637994	C	T	4.65556375799866	13239	0.24096	0.0865709664027398	0.0138306315415556	6.25936466766742	3.86549013320396e-10	6	32637994	C	T	-14.4737	450243	0.4979	-0.0307943	0.00242547846837405	-12.6962	6.20870738660219e-37	6	32637994	C	T	0.151986	0.0326461	3.23087384070584e-06	4.65556375799866	6	32637994	C	T	-0.0275	0.0019	2.70022528688822e-48	-14.4737	2.65169e-50	2.01113388846579e-45
rs1265048	6	31081409	C	T	5.98154289920111	13239	0.24096	0.103949451346176	0.0138306315415556	7.51588609918852	5.65267514538431e-14	6	31081409	C	T	-14.35	450243	0.3134	-0.0330088	0.00261434080715386	-12.626	1.51721631148721e-36	6	31081409	C	T	0.200734	0.0335589	2.21009020597093e-09	5.98154289920111	6	31081409	C	T	-0.0287	0.002	1.70686824991566e-45	-14.35	1.8348e-49	4.44270043908374e-44
rs1051336	6	32412592	A	G	-4.63591	13239	0.24096	-0.0860697	0.0138306315415556	-6.22312	4.87370711683844e-10	6	32412592	A	G	14.3333333333333	450243	0.1866	0.0391400700209222	0.00311283208126134	12.5737813666654	2.94303447470773e-36	6	32412592	A	G	-0.206164	0.0444711	3.55385741986076e-06	-4.63591	6	32412592	A	G	0.0344	0.0024	4.79954424931941e-46	14.3333333333333	2.37815e-49	1.43673260513126e-44
rs2239806	6	32411307	T	C	-4.64686	13239	0.24096	-0.086215	0.0138306315415556	-6.23362	4.55766174423032e-10	6	32411307	T	C	14.3333333333333	450243	0.1867	0.0391329494042279	0.00311218963749295	12.5740889734958	2.93160246891293e-36	6	32411307	T	C	-0.206409	0.044419	3.37015596705416e-06	-4.64686	6	32411307	T	C	0.0344	0.0024	3.6846818914787e-46	14.3333333333333	2.37815e-49	1.45280615230395e-44
rs3129887	6	32410691	A	G	-5.07825	13239	0.24096	-0.0918663	0.0138306315415556	-6.64223	3.08966758969123e-11	6	32410691	A	G	14.2916666666667	450243	0.1878	0.0389698823362692	0.00310516234425944	12.5500305671017	3.97356611630563e-36	6	32410691	A	G	-0.227026	0.0447056	3.80934230647684e-07	-5.07825	6	32410691	A	G	0.0343	0.0024	3.2516216012048e-46	14.2916666666667	4.54249e-49	4.03814532064945e-44
rs9275408	6	32670110	C	T	14.1951588974336	13239	0.24096	0.205377181592618	0.0138306315415556	14.8494434961657	7.01485547933457e-50	6	32670110	C	T	-9.95455	450243	0.2476	-0.0254021	0.00280972544087654	-9.04076	1.55580837268619e-19	6	32670110	C	T	0.500412	0.0352523	9.81747943019978e-46	14.1951588974336	6	32670110	C	T	-0.0219	0.0022	1.07102596596608e-23	-9.95455	2.01898e-48	4.06893092298861e-19
rs9275375	6	32668632	A	G	14.1411135537811	13239	0.24096	0.204660213666293	0.0138306315415556	14.7976043647298	1.51793306549407e-49	6	32668632	A	G	-9.95455	450243	0.2476	-0.0253978	0.00280972544087654	-9.03925	1.5775612502864e-19	6	32668632	A	G	0.496585	0.0351164	2.11884896208663e-45	14.1411135537811	6	32668632	A	G	-0.0219	0.0022	1.17192548866257e-23	-9.95455	4.63464e-48	3.92788372735572e-19
rs9275418	6	32670244	G	A	14.1407108726728	13239	0.24096	0.204654871680847	0.0138306315415556	14.7972	1.52667298858203e-49	6	32670244	G	A	-9.95455	450243	0.2476	-0.0253978	0.00280972544087654	-9.03923	1.57772444941772e-19	6	32670244	G	A	0.496585	0.0351174	2.1315719667169e-45	14.1407108726728	6	32670244	G	A	-0.0219	0.0022	9.92887401325043e-24	-9.95455	4.66337e-48	3.92685115577192e-19
rs9275390	6	32669156	C	T	14.139612377711	13239	0.24096	0.204640298997955	0.0138306315415556	14.7961644689248	1.55077064456094e-49	6	32669156	C	T	-9.95455	450243	0.2474	-0.0254046	0.002810487401396	-9.0392	1.5781697337443e-19	6	32669156	C	T	0.496463	0.0351115	2.16520987930794e-45	14.139612377711	6	32669156	C	T	-0.0219	0.0022	8.97015608414814e-24	-9.95455	4.74264e-48	3.92403571286697e-19
rs9275374	6	32668526	T	C	14.1394512971386	13239	0.24096	0.204638162095937	0.0138306315415556	14.7960099639036	1.55433595553271e-49	6	32668526	T	C	-9.95455	450243	0.2475	-0.0254011	0.00281010626821752	-9.0392	1.57823503957152e-19	6	32668526	T	C	0.496463	0.0351119	2.16970155380084e-45	14.1394512971386	6	32668526	T	C	-0.0219	0.0022	1.15504791368285e-23	-9.95455	4.75438e-48	3.92362303100264e-19
rs9275393	6	32669439	A	G	14.1394512971386	13239	0.24096	0.204638162095937	0.0138306315415556	14.7960099639036	1.55433595553271e-49	6	32669439	A	G	-9.95455	450243	0.2476	-0.0253977	0.00280972544087654	-9.0392	1.57823503957152e-19	6	32669439	A	G	0.496463	0.0351119	2.16920201906873e-45	14.1394512971386	6	32669439	A	G	-0.0219	0.0022	1.03395110098238e-23	-9.95455	4.75438e-48	3.92362303100264e-19
rs9275406	6	32669955	T	G	14.1393707582286	13239	0.24096	0.204637093663184	0.0138306315415556	14.795932712713	1.55612163926398e-49	6	32669955	T	G	-9.95455	450243	0.2476	-0.0253977	0.00280972544087654	-9.0392	1.57826769292854e-19	6	32669955	T	G	0.496463	0.0351121	2.17270117886376e-45	14.1393707582286	6	32669955	T	G	-0.0219	0.0022	1.06905487922266e-23	-9.95455	4.76026e-48	3.92341670967532e-19
rs9275407	6	32670037	T	G	14.1390888792691	13239	0.24096	0.204633354244403	0.0138306315415556	14.7956623404766	1.5623874690516e-49	6	32670037	T	G	-9.95455	450243	0.2476	-0.0253976	0.00280972544087654	-9.03919	1.57838198200605e-19	6	32670037	T	G	0.496463	0.0351128	2.18072046882494e-45	14.1390888792691	6	32670037	T	G	-0.0219	0.0022	1.09294925908474e-23	-9.95455	4.78089e-48	3.92269468793796e-19
rs9275439	6	32671521	C	T	14.1390601198696	13239	0.24096	0.204555056858069	0.0138306315415556	14.7900011827704	1.69950819033943e-49	6	32671521	C	T	-9.90909	450243	0.2476	-0.0252868	0.00280972544087654	-8.99973	2.26280324717072e-19	6	32671521	C	T	0.496585	0.0351215	2.18222737756593e-45	14.1390601198696	6	32671521	C	T	-0.0218	0.0022	1.55991164440755e-23	-9.90909	4.783e-48	5.91343723307785e-19
rs9275427	6	32670915	T	C	14.138973842027	13239	0.24096	0.204553912292382	0.0138306315415556	14.7899184269191	1.70159902259488e-49	6	32670915	T	C	-9.90909	450243	0.2476	-0.0252868	0.00280972544087654	-8.99972	2.26285318621418e-19	6	32670915	T	C	0.496524	0.0351174	2.18474120647903e-45	14.138973842027	6	32670915	T	C	-0.0218	0.0022	1.42298394457933e-23	-9.90909	4.78933e-48	5.91310577514418e-19
rs9275424	6	32670576	G	A	14.1380822604392	13239	0.24096	0.204620000394352	0.0138306315415556	14.7946968133414	1.58496908764515e-49	6	32670576	G	A	-9.95455	450243	0.2476	-0.0253976	0.00280972544087654	-9.03916	1.57879018684189e-19	6	32670576	G	A	0.496463	0.0351153	2.21207577646412e-45	14.1380822604392	6	32670576	G	A	-0.0219	0.0022	1.26502759730727e-23	-9.95455	4.8553e-48	3.92011734511008e-19
rs9275425	6	32670874	A	C	14.1375588752898	13239	0.24096	0.204535141280879	0.0138306315415556	14.7885612212523	1.73625657124944e-49	6	32670874	A	C	-9.90909	450243	0.2476	-0.0252866	0.00280972544087654	-8.99968	2.26367234778104e-19	6	32670874	A	C	0.496463	0.0351166	2.22894832450507e-45	14.1375588752898	6	32670874	A	C	-0.0218	0.0022	1.35800071936321e-23	-9.90909	4.89445e-48	5.90767244396111e-19
rs9275428	6	32670978	G	A	14.1371160411986	13239	0.24096	0.204529266624181	0.0138306315415556	14.7881364643148	1.74724684752937e-49	6	32670978	G	A	-9.90909	450243	0.2476	-0.0252866	0.00280972544087654	-8.99967	2.26392877631175e-19	6	32670978	G	A	0.496463	0.0351177	2.24284881586928e-45	14.1371160411986	6	32670978	G	A	-0.0218	0.0022	1.46487308661344e-23	-9.90909	4.92781e-48	5.90597301865486e-19
rs9275388	6	32669084	C	T	14.1042728341827	13239	0.24096	0.204093567182995	0.0138306315415556	14.7566339664081	2.78855006056602e-49	6	32669084	C	T	-9.90909	450243	0.2476	-0.025284	0.00280972544087654	-8.99875	2.2830272590536e-19	6	32669084	C	T	0.496524	0.0352038	3.57519718745026e-45	14.1042728341827	6	32669084	C	T	-0.0218	0.0022	1.26911214444519e-23	-9.90909	8.15134e-48	5.78127041732714e-19
rs9275464	6	32672082	G	A	14.1031511137116	13239	0.24096	0.203455359486549	0.0138306315415556	14.710489457784	5.5206657302631e-49	6	32672082	G	A	-9.54545	450243	0.2429	-0.0245552	0.00282795970474982	-8.68302	3.85380820741441e-18	6	32672082	G	A	0.496524	0.0352066	3.63161666207504e-45	14.1031511137116	6	32672082	G	A	-0.021	0.0022	1.08993349702707e-21	-9.54545	8.29249e-48	1.43309586619174e-17
rs4248153	6	31002527	G	A	4.79199703194844	13239	0.24096	0.0875689309593382	0.0138306315415556	6.33152077663466	2.42756473337572e-10	6	31002527	G	A	-14	450243	0.3878	-0.0305859	0.00248893200585946	-12.2888	1.04065827649281e-34	6	31002527	G	A	0.160161	0.0334226	1.65131528172947e-06	4.79199703194844	6	31002527	G	A	-0.0266	0.0019	2.33776041227469e-42	-14	3.99772e-47	1.73509534033213e-42
rs11627032	14	93104072	C	T	-4.01131	13239	0.24096	-0.0771344	0.0138306315415556	-5.57707	2.44602661314184e-08	14	93104072	C	T	13.9545454545455	450243	0.2554	0.0340036472358765	0.00278094010359805	12.2273928848312	2.21948334077992e-34	14	93104072	C	T	-0.150358	0.0374835	6.03837388173513e-05	-4.01131	14	93104072	C	T	0.0307	0.0022	2.93426950395598e-45	13.9545454545455	7.96619e-47	1.49465571688199e-42
rs3135382	6	32383441	G	T	-4.37578	13239	0.24096	-0.0819046	0.0138306315415556	-5.92197	3.18110257161702e-09	6	32383441	G	T	13.9166666666667	450243	0.1861	0.038030633083664	0.00311605336450699	12.2047438329674	2.93229909533235e-34	6	32383441	G	T	-0.199183	0.0455194	1.20998503770368e-05	-4.37578	6	32383441	G	T	0.0334	0.0024	1.31492202534624e-45	13.9166666666667	1.41267e-46	3.60452927962878e-42
rs3117578	6	31636031	G	A	7.57810978441625	13239	0.24096	0.124331839903369	0.0138306315415556	8.98959960937432	2.4813271832832e-19	6	31636031	G	A	-13.8846	450243	0.8504	-0.041708	0.0034000568209732	-12.2669	1.36457085713298e-34	6	31636031	G	A	0.404665	0.0533992	3.50590383932613e-14	7.57810978441625	6	31636031	G	A	-0.0361	0.0026	9.33899192741434e-43	-13.8846	2.29101e-46	1.27445620909739e-40
rs3130050	6	31618761	A	G	7.56554700694314	13239	0.24096	0.12416518154013	0.0138306315415556	8.97754966337311	2.76863700054318e-19	6	31618761	A	G	-13.8846	450243	0.8498	-0.0416381	0.00339445665778178	-12.2665	1.37052815076005e-34	6	31618761	A	G	0.403168	0.05329	3.86278023011496e-14	7.56554700694314	6	31618761	A	G	-0.0361	0.0026	7.77678334455703e-43	-13.8846	2.29101e-46	1.25904666801403e-40
rs2857700	6	31572481	C	T	7.05710991612614	13239	0.24096	0.117067042501563	0.0138306315415556	8.46433094178114	2.5762732117589e-17	6	31572481	C	T	-13.6786	450243	0.8626	-0.0425298	0.00352261762889728	-12.0733	1.46080149877428e-33	6	31572481	C	T	0.400925	0.0568115	1.69980851320349e-12	7.05710991612614	6	31572481	C	T	-0.0383	0.0028	3.54486744473798e-42	-13.6786	4.99356e-45	1.2062454898606e-39
rs2857600	6	31582287	C	T	7.52242372269528	13239	0.24096	0.122965561567657	0.0138306315415556	8.8908132067718	6.0663284045842e-19	6	31582287	C	T	-13.5185	450243	0.8542	-0.0410564	0.00343641061520975	-11.9475	6.69416042537427e-33	6	31582287	C	T	0.410528	0.0545739	5.37774245963443e-14	7.52242372269528	6	31582287	C	T	-0.0365	0.0027	8.51334042543235e-43	-13.5185	5.29998e-44	1.54203189095212e-38
rs2857709	6	31532814	G	A	6.21392708588207	13239	0.24096	0.105509314832551	0.0138306315415556	7.62866934279445	2.37189129750441e-14	6	31532814	G	A	-13.4615	450243	0.8489	-0.0401637	0.00338612587551908	-11.8612	1.88161143861292e-32	6	31532814	G	A	0.317454	0.0510875	5.1673752410347e-10	6.21392708588207	6	31532814	G	A	-0.035	0.0026	1.53003018914347e-40	-13.4615	1.22062e-43	9.45400081038567e-39
rs2229094	6	31540556	C	T	4.35812947527727	13239	0.24096	0.0808782343519609	0.0138306315415556	5.84776147849456	4.98232276441095e-09	6	31540556	C	T	-13.4545	450243	0.2544	-0.032866	0.00278453123767416	-11.8031	3.76397588641127e-32	6	31540556	C	T	0.154351	0.0354168	1.31180716905081e-05	4.35812947527727	6	31540556	C	T	-0.0296	0.0022	1.38484127772197e-42	-13.4545	1.35189e-43	1.77956547167924e-39
rs9268831	6	32427748	T	C	6.43975222291356	13239	0.24096	0.108435722373677	0.0138306315415556	7.84025820136051	4.49620936339386e-15	6	32427748	T	C	-13.4211	450243	0.4788	-0.0287249	0.00242764021442688	-11.8324	2.65325566057262e-32	6	32427748	T	C	0.210104	0.0326261	1.19674053130724e-10	6.43975222291356	6	32427748	T	C	-0.0255	0.0019	6.22730303483123e-42	-13.4211	2.20335e-43	1.98594276745614e-38
rs9267576	6	31812038	G	T	7.23546306514102	13239	0.24096	0.118968267756962	0.0138306315415556	8.60179576033888	7.84783603073809e-18	6	31812038	G	T	-13.4074	450243	0.8542	-0.0406972	0.00343641061520975	-11.8429	2.34108227250754e-32	6	31812038	G	T	0.392746	0.0542807	4.63980789982125e-13	7.23546306514102	6	31812038	G	T	-0.0362	0.0027	5.33580561846038e-42	-13.4074	2.68757e-43	5.00419212432501e-38
rs3129891	6	32415080	A	G	-4.9447	13239	0.24096	-0.0885514	0.0138306315415556	-6.40255	1.527991971784e-10	6	32415080	A	G	13.3913043478261	450243	0.2091	0.0350835757090091	0.00298212465466328	11.7646241427726	5.93902463426446e-32	6	32415080	A	G	-0.204199	0.0412965	7.62570498940781e-07	-4.9447	6	32415080	A	G	0.0308	0.0023	2.29720630715834e-40	13.3913043478261	3.39675e-43	7.14945530300656e-39
rs2736177	6	31586094	T	C	7.54956503495731	13239	0.24096	0.1230960894993	0.0138306315415556	8.90025080412595	5.57206333449767e-19	6	31586094	T	C	-13.3846	450243	0.8523	-0.0404421	0.00341803972282981	-11.832	2.66801686990735e-32	6	31586094	T	C	0.410226	0.0543377	4.36716901504156e-14	7.54956503495731	6	31586094	T	C	-0.0348	0.0026	2.52580605483196e-40	-13.3846	3.74347e-43	9.01515883806306e-38
rs3129963	6	32380208	G	A	-4.66749	13239	0.24096	-0.0848458	0.0138306315415556	-6.13463	8.53567080270879e-10	6	32380208	G	A	13.375	450243	0.1908	0.0362421416088698	0.00308635924279618	11.7426841005181	7.70031431141458e-32	6	32380208	G	A	-0.207516	0.0444599	3.04901808250754e-06	-4.66749	6	32380208	G	A	0.0321	0.0024	6.45951632269629e-41	13.375	4.30443e-43	6.81146197882013e-39
rs3763317	6	32376788	T	C	10.8593245792583	13239	0.24096	0.166705091833398	0.0138306315415556	12.0533246318156	1.86281786865229e-33	6	32376788	T	C	-13.2105	450243	0.4484	-0.0287101	0.00243847701746752	-11.7738	5.32793597406878e-32	6	32376788	T	C	0.349983	0.0322288	1.80052849969888e-27	10.8593245792583	6	32376788	T	C	-0.0251	0.0019	2.93089324525031e-40	-13.2105	4.61811e-42	1.72246346500739e-35
rs2259435	6	31496915	A	G	4.38979324424465	13239	0.24096	0.0807828439151854	0.0138306315415556	5.84086443720698	5.1930649982682e-09	6	31496915	A	G	-13.1538	450243	0.1586	-0.03832	0.00331979106805328	-11.5429	8.01859285289235e-31	6	31496915	A	G	0.178899	0.0407534	1.13456661458953e-05	4.38979324424465	6	31496915	A	G	-0.0342	0.0026	6.27624661280023e-40	-13.1538	1.0391e-41	9.35622457807299e-38
rs3130287	6	32050544	T	C	7.83821423850246	13239	0.24096	0.126463820988624	0.0138306315415556	9.14374883089395	6.03240828481223e-20	6	32050544	T	C	-13.1154	450243	0.8504	-0.0394622	0.0034000568209732	-11.6063	3.82633284708167e-31	6	32050544	T	C	0.420985	0.0537093	4.56982953285961e-15	7.83821423850246	6	32050544	T	C	-0.0341	0.0026	2.93494522226977e-38	-13.1154	1.798e-41	3.67701196264104e-36
rs3134954	6	32071893	T	C	7.81094870766447	13239	0.24096	0.126102115247039	0.0138306315415556	9.11759632003437	7.68089178265921e-20	6	32071893	T	C	-13.1154	450243	0.8505	-0.0394705	0.00340099381514796	-11.6056	3.86073961525889e-31	6	32071893	T	C	0.418702	0.0536045	5.67544605408547e-15	7.81094870766447	6	32071893	T	C	-0.0341	0.0026	3.37364980873769e-38	-13.1154	1.798e-41	3.58672624854073e-36
rs12662501	6	31190850	T	C	4.59933349356604	13239	0.24096	0.0834825577492616	0.0138306315415556	6.03606259760657	1.57920013623626e-09	6	31190850	T	C	-13.1071	450243	0.1291	-0.0416222	0.00361673201942365	-11.5082	1.19917107697241e-30	6	31190850	T	C	0.199015	0.0432704	4.23857624689871e-06	4.59933349356604	6	31190850	T	C	-0.0367	0.0028	3.20110559153496e-39	-13.1071	2.02174e-41	2.07640395723027e-37
rs3130342	6	32080146	C	A	7.91800601313982	13239	0.24096	0.127456413403457	0.0138306315415556	9.21551651640062	3.09783216477202e-20	6	32080146	C	A	-13.0769	450243	0.8509	-0.0394107	0.00340475223704895	-11.5752	5.50472071393259e-31	6	32080146	C	A	0.426638	0.053882	2.41379286937296e-15	7.91800601313982	6	32080146	C	A	-0.034	0.0026	4.32016167618143e-38	-13.0769	3.10615e-41	6.42417305959483e-36
rs9267658	6	31845985	C	T	7.17976830362655	13239	0.24096	0.117658035585772	0.0138306315415556	8.50706167916161	1.78396641892001e-17	6	31845985	C	T	-13.0741	450243	0.854	-0.0396748	0.00343445819345019	-11.552	7.21330029500462e-31	6	31845985	C	T	0.389641	0.0542693	6.9823240407717e-13	7.17976830362655	6	31845985	C	T	-0.0353	0.0027	4.24619563946313e-40	-13.0741	3.23431e-41	3.40064863019123e-36
rs2857609	6	31577825	G	A	7.59504050906944	13239	0.24096	0.122974152278714	0.0138306315415556	8.89143434334321	6.03250742262891e-19	6	31577825	G	A	-12.9615	450243	0.8411	-0.0380354	0.00331724717081001	-11.466	1.955990295324e-30	6	31577825	G	A	0.393635	0.0518279	3.07680519375975e-14	7.59504050906944	6	31577825	G	A	-0.0337	0.0026	3.93912715446864e-39	-12.9615	1.58617e-40	2.04078314129234e-35
rs3130279	6	32112626	G	A	8.13557139177471	13239	0.24096	0.130144858946428	0.0138306315415556	9.40989994241358	4.96609430217115e-21	6	32112626	G	A	-12.9615	450243	0.85	-0.0389936	0.00339631923757095	-11.4811	1.64119288885152e-30	6	32112626	G	A	0.435873	0.0535762	4.10015240506613e-16	8.13557139177471	6	32112626	G	A	-0.0337	0.0026	1.91999456795428e-37	-12.9615	1.58617e-40	3.32047107794225e-35
rs5007259	6	32379101	C	T	11.6718928555104	13239	0.24096	0.176943348426216	0.0138306315415556	12.7935841465063	1.78068230566634e-37	6	32379101	C	T	-12.8947	450243	0.5278	-0.0279905	0.00242921477059113	-11.5224	1.01678383910234e-30	6	32379101	C	T	0.383019	0.0328155	1.77459805015171e-31	11.6718928555104	6	32379101	C	T	-0.0245	0.0019	1.84501541917947e-38	-12.8947	4.05002e-40	1.74348612604873e-33
rs5007265	6	32378866	G	T	11.6739178122258	13239	0.24096	0.176970211591828	0.0138306315415556	12.7955264414428	1.73671570331564e-37	6	32378866	G	T	-12.8947	450243	0.5279	-0.027991	0.0024292419164148	-11.5225	1.01611285390536e-30	6	32378866	G	T	0.383166	0.0328224	1.73260674194744e-31	11.6739178122258	6	32378866	G	T	-0.0245	0.0019	1.71988734123825e-38	-12.8947	4.05002e-40	1.74658177213024e-33
rs6932542	6	32380262	G	A	11.6587687835025	13239	0.24096	0.17676924390478	0.0138306315415556	12.7809958188574	2.09371490952675e-37	6	32380262	G	A	-12.8947	450243	0.5278	-0.0279896	0.00242921477059113	-11.5221	1.02114327795115e-30	6	32380262	G	A	0.382579	0.0328147	2.07014134879104e-31	11.6587687835025	6	32380262	G	A	-0.0245	0.0019	1.66993666441551e-38	-12.8947	4.05002e-40	1.72355444345692e-33
rs3130283	6	32138545	C	A	8.19746051897662	13239	0.24096	0.130834025239188	0.0138306315415556	9.45972892460354	3.08742548881131e-21	6	32138545	C	A	-12.8846	450243	0.8521	-0.0389988	0.0034161287296571	-11.4161	3.47528311596026e-30	6	32138545	C	A	0.436491	0.0532471	2.45470891568503e-16	8.19746051897662	6	32138545	C	A	-0.0335	0.0026	9.66941054609118e-37	-12.8846	4.66613e-40	9.12876152739902e-35
rs3130683	6	31888367	T	C	7.14480227216578	13239	0.24096	0.116813252665106	0.0138306315415556	8.44598110463197	3.01502462116679e-17	6	31888367	T	C	-12.8519	450243	0.8527	-0.0388659	0.00342187461932446	-11.3581	6.76132270288587e-30	6	31888367	T	C	0.384634	0.0538341	9.01363567078142e-13	7.14480227216578	6	31888367	T	C	-0.0347	0.0027	6.00620290919469e-39	-12.8519	7.37401e-40	5.34388223694696e-35
rs5007263	6	32378982	G	A	11.6737044145873	13239	0.24096	0.176877162281762	0.0138306315415556	12.788798671291	1.89378641925956e-37	6	32378982	G	A	-12.8421	450243	0.5278	-0.0278796	0.00242921477059113	-11.4768	1.7253281518808e-30	6	32378982	G	A	0.383166	0.032823	1.73700072613737e-31	11.6737044145873	6	32378982	G	A	-0.0244	0.0019	2.46717525185162e-38	-12.8421	8.44753e-40	3.30481326389457e-33
rs6926737	6	32375745	A	G	11.6638786594492	13239	0.24096	0.176746813378233	0.0138306315415556	12.7793740182564	2.13783206044411e-37	6	32375745	A	G	-12.8421	450243	0.5279	-0.0278793	0.0024292419164148	-11.4765	1.73084178406261e-30	6	32375745	A	G	0.384193	0.0329387	1.94984459975804e-31	11.6638786594492	6	32375745	A	G	-0.0244	0.0019	2.4271689070387e-38	-12.8421	8.44753e-40	3.27660864794886e-33
rs2516478	6	31498737	A	G	4.39278141014314	13239	0.24096	0.0802291257931943	0.0138306315415556	5.80082880178951	6.5987944914136e-09	6	31498737	A	G	-12.8077	450243	0.1584	-0.0373417	0.00332149150033365	-11.2425	2.52261888465466e-29	6	31498737	A	G	0.178983	0.0407448	1.11915438326362e-05	4.39278141014314	6	31498737	A	G	-0.0333	0.0026	4.57720116705089e-38	-12.8077	1.3639e-39	7.75708541901343e-36
rs9275312	6	32665728	G	A	12.6938536006104	13239	0.24096	0.182171636430979	0.0138306315415556	13.1716065086128	1.27847963062885e-39	6	32665728	G	A	-8.03571	450243	0.128	-0.0266175	0.00362994771976036	-7.33275	2.25470004612784e-13	6	32665728	G	A	0.547312	0.0431163	6.39734835482644e-37	12.6938536006104	6	32665728	G	A	-0.0225	0.0028	1.3399851948998e-15	-8.03571	6.59251e-39	1.05109424011085e-12
rs3094606	6	31173678	G	A	4.31272519348645	13239	0.24096	0.078969310050645	0.0138306315415556	5.70973999367803	1.13148898841072e-08	6	31173678	G	A	-12.6923	450243	0.8433	-0.0371642	0.00333609223283354	-11.14	8.00862736670257e-29	6	31173678	G	A	0.212698	0.0493187	1.61253815697349e-05	4.31272519348645	6	31173678	G	A	-0.033	0.0026	3.63580012300144e-37	-12.6923	6.73443e-39	3.06233460610911e-35
rs3095238	6	31161210	G	T	4.13524639368047	13239	0.24096	0.0766148684195263	0.0138306315415556	5.53950614542283	3.0332580254051e-08	6	31161210	G	T	-12.6923	450243	0.8429	-0.037109	0.00333263290479709	-11.1351	8.46950778314413e-29	6	31161210	G	T	0.203218	0.0491429	3.54560213316523e-05	4.13524639368047	6	31161210	G	T	-0.033	0.0026	3.08673964568386e-37	-12.6923	6.73443e-39	2.61021808821378e-35
rs7382297	6	31247067	G	T	4.51014563651002	13239	0.24096	0.0815882984052921	0.0138306315415556	5.8991014372808	3.65486500174012e-09	6	31247067	G	T	-12.6923	450243	0.8424	-0.0370962	0.00332832948077651	-11.1456	7.52514806368043e-29	6	31247067	G	T	0.22127	0.0490605	6.47828425317922e-06	4.51014563651002	6	31247067	G	T	-0.033	0.0026	2.02395102798875e-37	-12.6923	6.73443e-39	3.65713042067638e-35
rs2523512	6	31506801	A	G	4.39488475223019	13239	0.24096	0.0799933135944672	0.0138306315415556	5.78377880678251	7.30409710668429e-09	6	31506801	A	G	-12.6538	450243	0.1588	-0.0368606	0.00331809423827318	-11.109	1.13481681256613e-28	6	31506801	A	G	0.178983	0.0407253	1.10835784607549e-05	4.39488475223019	6	31506801	A	G	-0.0329	0.0026	1.97514962206076e-37	-12.6538	1.1431e-38	5.32196653157307e-35
rs2596540	6	31367882	G	A	6.16382662267556	13239	0.24096	0.103460174917389	0.0138306315415556	7.48050980944234	7.40348415425119e-14	6	31367882	G	A	-12.6538	450243	0.8503	-0.0379295	0.00339912086785218	-11.1586	6.49838862181091e-29	6	31367882	G	A	0.326562	0.0529804	7.10149850571272e-10	6.16382662267556	6	31367882	G	A	-0.0329	0.0026	9.00741142186955e-36	-12.6538	1.1431e-38	2.57769000507273e-34
rs3094609	6	31165566	C	T	4.14041721017405	13239	0.24096	0.0766175358934663	0.0138306315415556	5.5396990125332	3.02991947335097e-08	6	31165566	C	T	-12.6538	450243	0.8432	-0.037027	0.00333522601259801	-11.1018	1.22932850714846e-28	6	31165566	C	T	0.203463	0.0491407	3.46657020533339e-05	4.14041721017405	6	31165566	C	T	-0.0329	0.0026	3.94184914714298e-37	-12.6538	1.1431e-38	4.23576214351536e-35
rs3132499	6	31207920	T	C	4.2512009530373	13239	0.24096	0.0780871979406152	0.0138306315415556	5.64596039638492	1.64261658572751e-08	6	31207920	T	C	-12.6538	450243	0.843	-0.0370182	0.00333349635004088	-11.1049	1.18725899183592e-28	6	31207920	T	C	0.209117	0.0491901	2.12617985986252e-05	4.2512009530373	6	31207920	T	C	-0.0329	0.0026	5.00380065925268e-37	-12.6538	1.1431e-38	4.67854492515043e-35
rs3130952	6	31177915	A	G	4.30922854117733	13239	0.24096	0.0787910656919233	0.0138306315415556	5.69685234222219	1.2203953392325e-08	6	31177915	A	G	-12.6154	450243	0.8432	-0.0369315	0.00333522601259801	-11.0732	1.69327749195709e-28	6	31177915	A	G	0.212451	0.0493014	1.63824933372156e-05	4.30922854117733	6	31177915	A	G	-0.0328	0.0026	7.70371131697605e-37	-12.6154	1.93718e-38	7.94525658714086e-35
rs9264731	6	31244068	A	G	4.5046754496095	13239	0.24096	0.0813838730491356	0.0138306315415556	5.88432081388394	3.99691893933334e-09	6	31244068	A	G	-12.6154	450243	0.8425	-0.0368829	0.00332918833011432	-11.0786	1.59262561328876e-28	6	31244068	A	G	0.221021	0.0490648	6.64752531683554e-06	4.5046754496095	6	31244068	A	G	-0.0328	0.0026	7.72680585095699e-37	-12.6154	1.93718e-38	9.46147138640298e-35
rs6928399	6	31195218	T	C	4.3456650158124	13239	0.24096	0.0792480620579247	0.0138306315415556	5.72989467760856	1.00493010592996e-08	6	31195218	T	C	-12.6	450243	0.3293	-0.0285424	0.00258049830968743	-11.0608	1.94303665497062e-28	6	31195218	T	C	0.145658	0.033518	1.38860907761622e-05	4.3456650158124	6	31195218	T	C	-0.0252	0.002	1.88018247349027e-36	-12.6	2.39117e-38	9.9315063466204e-35
rs3130528	6	31199460	C	T	4.24959891987954	13239	0.24096	0.0779340876836	0.0138306315415556	5.63489002287702	1.75170088263295e-08	6	31199460	C	T	-12.5769	450243	0.8431	-0.036805	0.00333436071882137	-11.0381	2.50291599609437e-28	6	31199460	C	T	0.208994	0.0491797	2.14150947376362e-05	4.24959891987954	6	31199460	C	T	-0.0327	0.0026	1.18004888806896e-36	-12.5769	3.27764e-38	1.21275457113074e-34
rs1964995	6	32449411	C	T	7.80681755502032	13239	0.24096	0.125037559463939	0.0138306315415556	9.04062544709186	1.55777928634298e-19	6	32449411	C	T	-12.5263	450243	0.4739	-0.0269449	0.00242876833531696	-11.0941	1.34066819660408e-28	6	32449411	C	T	0.254763	0.0326334	5.86408153276476e-15	7.80681755502032	6	32449411	C	T	-0.0238	0.0019	1.34586035405594e-36	-12.5263	6.53154e-38	5.15971262543516e-33
rs9378264	6	32443451	A	G	7.78435703192249	13239	0.24096	0.124739597168183	0.0138306315415556	9.01908179632936	1.89672343097e-19	6	32443451	A	G	-12.5263	450243	0.4737	-0.0269439	0.00242881938300299	-11.0934	1.35015819112237e-28	6	32443451	A	G	0.254118	0.0326447	7.00648182865411e-15	7.78435703192249	6	32443451	A	G	-0.0238	0.0019	1.74984668862467e-36	-12.5263	6.53154e-38	5.059902429915e-33
rs3130933	6	31132085	C	T	5.9875591392188	13239	0.24096	0.10082634393485	0.0138306315415556	7.29007519518586	3.09782076270359e-13	6	31132085	C	T	-12.4815	450243	0.8548	-0.0378792	0.00344229457590217	-11.004	3.65378645032629e-28	6	31132085	C	T	0.318416	0.0531796	2.13010003741125e-09	5.9875591392188	6	31132085	C	T	-0.0337	0.0027	2.03798038628704e-36	-12.4815	1.20034e-37	1.81424771088599e-33
rs1694112	6	32649664	C	T	-8.46926	13239	0.24096	-0.0920175	0.0138306315415556	-6.65317	2.86849561941426e-11	6	32649664	C	T	-11.8636	450243	0.2443	-0.0283986	0.00282245582153313	-10.0617	8.16152106537537e-24	6	32649664	C	T	-0.332819	0.0392973	2.46944865101259e-17	-8.46926	6	32649664	C	T	-0.0261	0.0022	1.92220631633009e-32	-11.8636	1.21552e-37	9.53214758764049e-36
rs2523612	6	31321123	T	G	6.19503328620952	13239	0.24096	0.103515218172932	0.0138306315415556	7.48448961726076	7.18257119166548e-14	6	31321123	T	G	-12.4444	450243	0.8491	-0.0371922	0.00338797000833064	-10.9777	4.89141578046352e-28	6	31321123	T	G	0.334354	0.0539713	5.82679850331539e-10	6.19503328620952	6	31321123	T	G	-0.0336	0.0027	2.67793480625969e-36	-12.4444	1.98115e-37	3.40685007655773e-33
rs17212090	6	32650809	T	C	-8.46692	13239	0.24096	-0.0920644	0.0138306315415556	-6.65656	2.80311939047435e-11	6	32650809	T	C	-11.8182	450243	0.2405	-0.0284386	0.00283754114750762	-10.0223	1.2169012145587e-23	6	32650809	T	C	-0.33254	0.0392752	2.51999686210923e-17	-8.46692	6	32650809	T	C	-0.026	0.0022	2.69898207347202e-32	-11.8182	2.25342e-37	1.68934582566753e-35
rs9271588	6	32590953	C	T	8.96264115481197	13239	0.24096	0.140190329875619	0.0138306315415556	10.1362204216345	3.81578584204892e-24	6	32590953	C	T	-12.4211	450243	0.5053	-0.0267667	0.00242559334922201	-11.0351	2.58672658669834e-28	6	32590953	C	T	0.290887	0.0324555	3.1695674630435e-19	8.96264115481197	6	32590953	C	T	-0.0236	0.0019	4.20532921218045e-36	-12.4211	2.71659e-37	4.92806726817062e-32
rs3134943	6	32147761	C	T	8.21044432837599	13239	0.24096	0.130149194539125	0.0138306315415556	9.41021341997852	4.95130528085736e-21	6	32147761	C	T	-12.3846	450243	0.852	-0.0375067	0.00341517484051625	-10.9824	4.64553423789718e-28	6	32147761	C	T	0.448007	0.0545655	2.20394118181011e-16	8.21044432837599	6	32147761	C	T	-0.0322	0.0026	4.90907876152606e-34	-12.3846	4.43693e-37	3.98817265881738e-32
rs3131283	6	32119898	C	T	8.21864551604529	13239	0.24096	0.130233573781866	0.0138306315415556	9.41631431584056	4.67200184709431e-21	6	32119898	C	T	-12.3704	450243	0.857	-0.0380033	0.00346421763155699	-10.9702	5.31328031985985e-28	6	32119898	C	T	0.453029	0.0551221	2.05825889054205e-16	8.21864551604529	6	32119898	C	T	-0.0334	0.0027	1.56711186941094e-35	-12.3704	5.37289e-37	4.75688816410913e-32
rs3131294	6	32180146	G	A	7.37570565235518	13239	0.24096	0.118987609158288	0.0138306315415556	8.60319420705963	7.75276270600827e-18	6	32180146	G	A	-12.3333	450243	0.8561	-0.0377113	0.00345518218618266	-10.9144	9.83654842278023e-28	6	32180146	G	A	0.392746	0.0532486	1.63455673719756e-13	7.37570565235518	6	32180146	G	A	-0.0333	0.0027	2.01279710907301e-35	-12.3333	8.82847e-37	3.58665678675039e-32
rs3132940	6	32161396	G	T	7.75400862901668	13239	0.24096	0.124006193228056	0.0138306315415556	8.96605428721504	3.07326537857417e-19	6	32161396	G	T	-12.3333	450243	0.8564	-0.0377808	0.0034581836104674	-10.925	8.7507103460283e-28	6	32161396	G	T	0.421442	0.0543515	8.90430443593742e-15	7.75400862901668	6	32161396	G	T	-0.0333	0.0027	2.0067810900182e-35	-12.3333	8.82847e-37	4.96018632794479e-32
rs3132946	6	32190028	G	A	7.9375226842319	13239	0.24096	0.126313724826413	0.0138306315415556	9.1328963863212	6.66906823364788e-20	6	32190028	G	A	-12.2593	450243	0.8558	-0.0375111	0.00345219108101198	-10.8659	1.67598862252171e-27	6	32190028	G	A	0.441766	0.0556554	2.06252869784657e-15	7.9375226842319	6	32190028	G	A	-0.0331	0.0027	5.37774245963445e-35	-12.2593	2.37305e-36	1.39288549569153e-31
rs1044506	6	32172065	G	T	7.60039455118875	13239	0.24096	0.121777881059215	0.0138306315415556	8.8049400125598	1.30922584668449e-18	6	32172065	G	T	-12.2222	450243	0.856	-0.037389	0.00345418400719781	-10.8243	2.64208799010572e-27	6	32172065	G	T	0.409925	0.0539347	2.95256862172897e-14	7.60039455118875	6	32172065	G	T	-0.033	0.0027	8.09841447325789e-35	-12.2222	3.88194e-36	1.61800265011657e-31
rs9295947	6	31019460	A	G	6.24349408636866	13239	0.24096	0.103455365890713	0.0138306315415556	7.48016210104868	7.42309918455678e-14	6	31019460	A	G	-12.0345	450243	0.1194	-0.0397307	0.00374000423088095	-10.6232	2.32541909359947e-26	6	31019460	A	G	0.271705	0.0435181	4.27897747187818e-10	6.24349408636866	6	31019460	A	G	-0.0349	0.0029	6.10660740478832e-33	-12.0345	4.59817e-35	4.64123630031173e-31
rs9357152	6	32664960	G	A	-8.35913	13239	0.24096	-0.0913357	0.0138306315415556	-6.60387	4.00555898812493e-11	6	32664960	G	A	-11.4091	450243	0.2367	-0.0275898	0.00285309897206962	-9.67013	4.03864110597355e-22	6	32664960	G	A	-0.32781	0.0392158	6.31829646691897e-17	-8.35913	6	32664960	G	A	-0.0251	0.0022	8.83079900418566e-30	-11.4091	5.71416e-35	2.86359300838441e-33
rs2844670	6	31005726	A	G	5.06183704858535	13239	0.24096	0.0877203426239977	0.0138306315415556	6.34246833634693	2.26112693117027e-10	6	31005726	A	G	-12	450243	0.8326	-0.0343031	0.00324838627873289	-10.56	4.56454463870942e-26	6	31005726	A	G	0.241562	0.0477222	4.15221659652625e-07	5.06183704858535	6	31005726	A	G	-0.03	0.0025	1.13710350971065e-32	-12	7.21047e-35	2.56251159987138e-31
rs35366052	6	32531923	A	G	7.24517788653523	13239	0.24096	0.116684639032417	0.0138306315415556	8.43668191736762	3.2647336914973e-17	6	32531923	A	G	-12	450243	0.6025	-0.0263206	0.00247808674856931	-10.6214	2.37084289146537e-26	6	32531923	A	G	0.390084	0.0538405	4.31916703671044e-13	7.24517788653523	6	32531923	A	G	-0.0264	0.0022	5.73323838653843e-32	-12	7.21047e-35	1.60541905613888e-30
rs2254556	6	31342631	C	T	5.67109659024435	13239	0.24096	0.0955171152329987	0.0138306315415556	6.90620055534031	4.97806087320714e-12	6	31342631	C	T	-11.8333	450243	0.8187	-0.0328389	0.00314776498598928	-10.4325	1.76264733071512e-25	6	31342631	C	T	0.261754	0.0461558	1.41876347709537e-08	5.67109659024435	6	31342631	C	T	-0.0284	0.0024	2.57691444517387e-31	-11.8333	6.22893e-34	2.96540606028448e-30
rs2523537	6	31335707	G	A	5.66759391047411	13239	0.24096	0.0954706485277892	0.0138306315415556	6.90284086022661	5.09727232733278e-12	6	31335707	G	A	-11.8333	450243	0.8187	-0.0328386	0.00314776498598928	-10.4324	1.76447346358714e-25	6	31335707	G	A	0.262014	0.0462302	1.44817151227851e-08	5.66759391047411	6	31335707	G	A	-0.0284	0.0024	3.2173625326956e-31	-11.8333	6.22893e-34	2.9567870785112e-30
rs2394427	6	31019562	A	G	6.24518308305663	13239	0.24096	0.10312312068197	0.0138306315415556	7.45613968329105	8.90942903595325e-14	6	31019562	A	G	-11.8276	450243	0.1218	-0.0387252	0.00370802998082947	-10.4436	1.56762507455103e-25	6	31019562	A	G	0.271781	0.0435185	4.23291940925165e-10	6.24518308305663	6	31019562	A	G	-0.0343	0.0029	7.36715827029878e-33	-11.8276	6.70613e-34	5.09973752519166e-30
rs3132538	6	31113842	G	A	4.49033521035967	13239	0.24096	0.079840661019877	0.0138306315415556	5.77274152521431	7.79920335389413e-09	6	31113842	G	A	-11.8261	450243	0.7829	-0.0305719	0.00294157915417098	-10.393	2.66801034459568e-25	6	31113842	G	A	0.189467	0.0421944	7.11115262662355e-06	4.49033521035967	6	31113842	G	A	-0.0272	0.0023	7.15484121416895e-33	-11.8261	6.83648e-34	1.20476091883195e-30
rs2596548	6	31330546	G	T	5.67249184215765	13239	0.24096	0.0953927789581881	0.0138306315415556	6.89721063507261	5.30335205056621e-12	6	31330546	G	T	-11.75	450243	0.8187	-0.0326113	0.00314776498598928	-10.3602	3.76360487185855e-25	6	31330546	G	T	0.262144	0.0462132	1.40731073341812e-08	5.67249184215765	6	31330546	G	T	-0.0282	0.0024	6.02698346521186e-31	-11.75	1.81026e-33	7.72803980644697e-30
rs3099849	6	31351415	A	G	5.63069649611851	13239	0.24096	0.0948383200436071	0.0138306315415556	6.85712143792242	7.0261901821679e-12	6	31351415	A	G	-11.75	450243	0.818	-0.0325588	0.00314304972316332	-10.359	3.81007262552831e-25	6	31351415	A	G	0.259159	0.0460261	1.79469230203935e-08	5.63069649611851	6	31351415	A	G	-0.0282	0.0024	5.35796657513341e-31	-11.75	1.81026e-33	7.46607105509582e-30
rs3130503	6	31137165	G	A	4.42032481106287	13239	0.24096	0.0787628435238644	0.0138306315415556	5.69481178695369	1.23508090886025e-08	6	31137165	G	A	-11.7391	450243	0.7817	-0.0302837	0.00293573380399141	-10.3156	5.99366509752746e-25	6	31137165	G	A	0.186932	0.0422892	9.8553034278093e-06	4.42032481106287	6	31137165	G	A	-0.027	0.0023	1.69316779751001e-32	-11.7391	2.07938e-33	3.10494668518382e-30
rs760293	6	31611777	C	T	5.28155914155191	13239	0.24096	0.0900638026617401	0.0138306315415556	6.51190817940118	7.42020752469599e-11	6	31611777	C	T	-11.6667	450243	0.8186	-0.0323421	0.00314708944173482	-10.2768	8.96294316862133e-25	6	31611777	C	T	0.241053	0.0456405	1.28085509453628e-07	5.28155914155191	6	31611777	C	T	-0.028	0.0024	1.84119590368765e-30	-11.6667	5.22161e-33	1.4498586348745e-29
rs3132517	6	31141836	T	C	4.28353658536585	13239	0.24096	0.0767991484205873	0.0138306315415556	5.55283019360584	2.81081091410497e-08	6	31141836	T	C	-11.6522	450243	0.7829	-0.0301106	0.00294157915417098	-10.2362	1.36468012054306e-24	6	31141836	T	C	0.180683	0.0421808	1.83950088029815e-05	4.28353658536585	6	31141836	T	C	-0.0268	0.0023	8.69560893254594e-32	-11.6522	6.2731e-33	7.5229123656071e-30
rs2905722	6	31449327	G	A	6.0678906044774	13239	0.24096	0.100275548040145	0.0138306315415556	7.25025084638084	4.1600045984226e-13	6	31449327	G	A	-11.5385	450243	0.845	-0.0341383	0.00335096115852972	-10.1876	2.2523708925989e-24	6	31449327	G	A	0.311838	0.0513915	1.29601491625784e-09	6.0678906044774	6	31449327	G	A	-0.03	0.0026	7.63835783577689e-31	-11.5385	2.62555e-32	1.17001144785509e-28
rs2523485	6	31351035	C	T	6.1231884057971	13239	0.24096	0.100877273511363	0.0138306315415556	7.29375757052501	3.01427620770722e-13	6	31351035	C	T	-11.4615	450243	0.8382	-0.0333337	0.00329306657316472	-10.1224	4.39594009540702e-24	6	31351035	C	T	0.307749	0.0502596	9.17212574401365e-10	6.1231884057971	6	31351035	C	T	-0.0298	0.0026	1.97287695552572e-31	-11.4615	6.86056e-32	2.88635832687938e-28
rs9267992	6	32220397	A	G	7.83991532322529	13239	0.24096	0.123651448951324	0.0138306315415556	8.9404051130854	3.87746269698261e-19	6	32220397	A	G	-11.4615	450243	0.8512	-0.0346571	0.00340758206972532	-10.1706	2.6827304107834e-24	6	32220397	A	G	0.426638	0.0544187	4.5081670454146e-15	7.83991532322529	6	32220397	A	G	-0.0298	0.0026	1.75186243420857e-29	-11.4615	6.86056e-32	1.13501861248475e-27
rs660895	6	32577380	G	A	11.2248363988587	13239	0.24096	0.164411046660632	0.0138306315415556	11.8874576454909	1.37529409503639e-32	6	32577380	G	A	-9.04348	450243	0.2126	-0.0242055	0.00296404137824719	-8.1664	3.17737624168771e-16	6	32577380	G	A	0.427618	0.0380957	3.0789313097416e-29	11.2248363988587	6	32577380	G	A	-0.0208	0.0023	1.47197352897794e-19	-9.04348	1.26621e-30	1.75254076586512e-16
rs2294878	6	32367795	T	G	11.1795015695441	13239	0.24096	0.166080782142972	0.0138306315415556	12.0081849945872	3.21830916129737e-33	6	32367795	T	G	-10.3684	450243	0.4693	-0.0226368	0.00243004198140204	-9.31538	1.21514331933482e-20	6	32367795	T	G	0.362549	0.0324298	5.13806980232343e-29	11.1795015695441	6	32367795	T	G	-0.0197	0.0019	1.13187899365541e-25	-10.3684	2.19787e-30	1.10304886448973e-21
rs3129868	6	32404377	C	A	8.0336945403875	13239	0.24096	0.125496915764738	0.0138306315415556	9.07383841350041	1.14896451326586e-19	6	32404377	C	A	-11.0385	450243	0.8496	-0.0332771	0.00339259820102777	-9.80874	1.03253005041942e-22	6	32404377	C	A	0.433556	0.0539672	9.45801503371012e-16	8.0336945403875	6	32404377	C	A	-0.0287	0.0026	9.49510999202196e-28	-11.0385	1.2048e-29	1.26230299584371e-25
rs3134603	6	32126002	G	A	7.83545337760422	13239	0.24096	0.122801110898312	0.0138306315415556	8.87892288427633	6.75108897519547e-19	6	32126002	G	A	-11	450243	0.8569	-0.0338348	0.00346320906165854	-9.76978	1.51783169906023e-22	6	32126002	G	A	0.428785	0.0547237	4.67196951171879e-15	7.83545337760422	6	32126002	G	A	-0.0297	0.0027	1.67417171390712e-28	-11	1.90894e-29	1.62887766267658e-25
rs9271366	6	32586854	A	G	7.58093781229239	13239	0.24096	0.119424696118671	0.0138306315415556	8.63479702715286	5.88314038524638e-18	6	32586854	A	G	-11	450243	0.8505	-0.0332026	0.00340099381514796	-9.76263	1.62873944814351e-22	6	32586854	A	G	0.407367	0.0537357	3.4308363277495e-14	7.58093781229239	6	32586854	A	G	-0.0286	0.0026	2.04314881451718e-27	-11	1.90894e-29	1.34213044278493e-25
rs9263911	6	31175667	G	A	4.27432724039676	13239	0.24096	0.0754904876325853	0.0138306315415556	5.45820972858441	4.80959350151141e-08	6	31175667	G	A	-10.96	450243	0.1904	-0.0297611	0.00308883618057525	-9.63504	5.68682633572849e-22	6	31175667	G	A	0.138457	0.0323927	1.91721138807392e-05	4.27432724039676	6	31175667	G	A	-0.0274	0.0025	3.16009399044795e-27	-10.96	3.07558e-29	1.61895550500415e-26
rs9268402	6	32341353	A	G	5.65709548478956	13239	0.24096	0.0938127000935712	0.0138306315415556	6.78296575334978	1.17733553552535e-11	6	32341353	A	G	-10.9474	450243	0.5013	-0.0234371	0.0024254652736461	-9.66291	4.33375629398508e-22	6	32341353	A	G	0.183562	0.0324481	1.53943019240247e-08	5.65709548478956	6	32341353	A	G	-0.0208	0.0019	1.86594999050225e-28	-10.9474	3.57423e-29	5.38658435509264e-26
rs3117116	6	32367017	A	G	7.98635708211632	13239	0.24096	0.124605219715283	0.0138306315415556	9.00936586596883	2.07251381221735e-19	6	32367017	A	G	-10.8846	450243	0.8489	-0.0327569	0.00338612587551908	-9.67384	3.89465506472523e-22	6	32367017	A	G	0.432014	0.054094	1.3896326196366e-15	7.98635708211632	6	32367017	A	G	-0.0283	0.0026	6.76394394809604e-27	-10.8846	7.52065e-29	6.11502565837204e-25
rs2523887	6	31040725	G	A	6.04273856739171	13239	0.24096	0.0986292973875571	0.0138306315415556	7.13122152746349	9.94820557565827e-13	6	31040725	G	A	-10.7727	450243	0.2274	-0.0275502	0.0028932836669125	-9.52212	1.69674675264151e-21	6	31040725	G	A	0.218332	0.0361313	1.5151652453956e-09	6.04273856739171	6	31040725	G	A	-0.0237	0.0022	3.30902463192214e-26	-10.7727	2.80349e-28	4.55259344129618e-25
rs3129889	6	32413545	A	G	8.03009993783084	13239	0.24096	0.124811917806386	0.0138306315415556	9.02431081555275	1.80829985653419e-19	6	32413545	A	G	-10.6667	450243	0.8544	-0.0326159	0.00343836747607757	-9.48586	2.40393975433922e-21	6	32413545	A	G	0.446912	0.0556546	9.73867785328634e-16	8.03009993783084	6	32413545	A	G	-0.0288	0.0027	3.91020926126812e-27	-10.6667	9.63712e-28	5.96835585634449e-24
rs7381988	6	31246703	A	G	5.00684963461547	13239	0.24096	0.0846596345341403	0.0138306315415556	6.12116910784379	9.28912534259248e-10	6	31246703	A	G	-10.64	450243	0.8238	-0.0298505	0.00318309610820646	-9.3778	6.73607299042289e-21	6	31246703	A	G	0.236102	0.0471558	5.53260926903287e-07	5.00684963461547	6	31246703	A	G	-0.0266	0.0025	2.75296062615515e-27	-10.64	1.31203e-27	8.32957289550484e-25
rs3135350	6	32392981	T	C	8.04176376661488	13239	0.24096	0.124903163677066	0.0138306315415556	9.03090819112498	1.70252882754252e-19	6	32392981	T	C	-10.6296	450243	0.8544	-0.0325064	0.00343836747607757	-9.45403	3.26021468665883e-21	6	32392981	T	C	0.447225	0.0556128	8.85523314502856e-16	8.04176376661488	6	32392981	T	C	-0.0287	0.0027	5.77032135332928e-27	-10.6296	1.47898e-27	8.7750656028589e-24
rs3135388	6	32413051	G	A	8.04630681001524	13239	0.24096	0.124963431892343	0.0138306315415556	9.03526578066063	1.63604371978696e-19	6	32413051	G	A	-10.6296	450243	0.8544	-0.0325069	0.00343836747607757	-9.45416	3.25624155722577e-21	6	32413051	G	A	0.447851	0.0556592	8.53296570195113e-16	8.04630681001524	6	32413051	G	A	-0.0287	0.0027	6.18728327553233e-27	-10.6296	1.47898e-27	8.80431811203865e-24
rs2256962	6	31065620	G	A	5.90576743881418	13239	0.24096	0.0965054386098301	0.0138306315415556	6.97765957540472	3.0013782982196e-12	6	31065620	G	A	-10.5938	450243	0.9045	-0.0386338	0.00412626984512821	-9.3629	7.75796966325778e-21	6	31065620	G	A	0.396753	0.0671806	3.50994248467012e-09	5.90576743881418	6	31065620	G	A	-0.0339	0.0032	4.48848729274599e-26	-10.5938	2.23641e-27	2.6238704627313e-24
rs3135352	6	32392906	A	C	8.04060689119339	13239	0.24096	0.124824329517035	0.0138306315415556	9.02520822292076	1.79353956532538e-19	6	32392906	A	C	-10.5926	450243	0.8544	-0.0323958	0.00343836747607757	-9.42185	4.43223814364276e-21	6	32392906	A	C	0.447069	0.0556014	8.93922770479138e-16	8.04060689119339	6	32392906	A	C	-0.0286	0.0027	7.27779804536821e-27	-10.5926	2.26639e-27	1.27633335302046e-23
rs4413654	6	31441349	A	G	7.02380720043048	13239	0.24096	0.111332533941825	0.0138306315415556	8.04970717405885	8.29923613386926e-16	6	31441349	A	G	-10.5909	450243	0.2253	-0.0272625	0.00290279404594994	-9.39183	5.89669935008964e-21	6	31441349	A	G	0.251925	0.0358673	2.15873831601281e-12	7.02380720043048	6	31441349	A	G	-0.0233	0.0022	3.21366053864033e-25	-10.5909	2.31071e-27	6.16493521332522e-24
rs1265097	6	31106459	A	C	5.02097653496325	13239	0.24096	0.0847583102028731	0.0138306315415556	6.12830368217153	8.88209340581028e-10	6	31106459	A	C	-10.5882	450243	0.0825	-0.0411403	0.00440791881125993	-9.33326	1.02662347290119e-20	6	31106459	A	C	0.248577	0.0495077	5.14079161686366e-07	5.02097653496325	6	31106459	A	C	-0.036	0.0034	4.70868892344272e-26	-10.5882	2.38287e-27	1.43903498713229e-24
rs6920338	6	32288089	T	C	7.66819340336885	13239	0.24096	0.119857015783084	0.0138306315415556	8.66605515611924	4.47350301930407e-18	6	32288089	T	C	-10.5769	450243	0.8468	-0.0316424	0.00336700522341611	-9.39778	5.57241978623425e-21	6	32288089	T	C	0.407668	0.0531635	1.74461659813301e-14	7.66819340336885	6	32288089	T	C	-0.0275	0.0026	6.56901116476265e-26	-10.5769	2.71373e-27	1.13959833052077e-23
rs3117119	6	32318610	A	G	6.96514192362671	13239	0.24096	0.110501294990629	0.0138306315415556	7.98960587292167	1.35370828338024e-15	6	32318610	A	G	-10.56	450243	0.8325	-0.0304085	0.00324761150058859	-9.36335	7.72492575508221e-21	6	32318610	A	G	0.341083	0.04897	3.28095293113119e-12	6.96514192362671	6	32318610	A	G	-0.0264	0.0025	9.79941161095592e-26	-10.56	3.29555e-27	8.08824016734399e-24
rs3132963	6	32320153	A	G	6.94397505019518	13239	0.24096	0.110220494308731	0.0138306315415556	7.96930306310034	1.59571698269189e-15	6	32320153	A	G	-10.56	450243	0.8327	-0.0304211	0.0032491618448864	-9.36275	7.76852363944921e-21	6	32320153	A	G	0.340661	0.0490585	3.812413511043e-12	6.94397505019518	6	32320153	A	G	-0.0264	0.0025	1.43615065290748e-25	-10.56	3.29555e-27	7.9636834023498e-24
rs3828796	6	32635974	G	A	10.5540941386325	13239	0.24096	0.155369855906624	0.0138306315415556	11.2337499151646	2.78406527907165e-29	6	32635974	G	A	-8.96	450243	0.1756	-0.0257383	0.00318736904178012	-8.07509	6.74283504647153e-16	6	32635974	G	A	0.421273	0.0399156	4.86295219186786e-26	10.5540941386325	6	32635974	G	A	-0.0224	0.0025	1.48115326414855e-19	-8.96	3.52645e-27	2.34880418892983e-16
rs2647025	6	32635949	A	G	10.5279219766831	13239	0.24096	0.15296894111127	0.0138306315415556	11.060155904787	1.95756965261052e-28	6	32635949	A	G	-7.7619	450243	0.2825	-0.0189478	0.00269366397872305	-7.03422	2.00382723131037e-12	6	32635949	A	G	0.364643	0.0346358	6.42391816824387e-26	10.5279219766831	6	32635949	A	G	-0.0163	0.0021	5.65067071335312e-15	-7.7619	4.75847e-27	2.45236593332572e-12
rs3129934	6	32336187	C	T	6.87756584997373	13239	0.24096	0.109270940953386	0.0138306315415556	7.90064724268514	2.77458861211195e-15	6	32336187	C	T	-10.52	450243	0.8327	-0.0303022	0.0032491618448864	-9.32616	1.09773818421653e-20	6	32336187	C	T	0.335053	0.0487168	6.08835545761395e-12	6.87756584997373	6	32336187	C	T	-0.0263	0.0025	1.72186857498601e-25	-10.52	5.20946e-27	1.13843836965247e-23
rs9268199	6	32278635	A	G	7.96966837646629	13239	0.24096	0.123758821515092	0.0138306315415556	8.94816850143431	3.61429027023232e-19	6	32278635	A	G	-10.52	450243	0.8206	-0.0295744	0.00316072434679717	-9.35683	8.21628904786638e-21	6	32278635	A	G	0.383459	0.0481148	1.59110924801754e-15	7.96966837646629	6	32278635	A	G	-0.0263	0.0025	8.67760744991149e-27	-10.52	5.20946e-27	2.52091083865587e-23
rs3135391	6	32410987	G	A	8.06270978540603	13239	0.24096	0.124990573493393	0.0138306315415556	9.0372282073921	1.60694656710694e-19	6	32410987	G	A	-10.5185	450243	0.8539	-0.0321311	0.00343348364251455	-9.35816	8.11378541208805e-21	6	32410987	G	A	0.448947	0.0556819	7.46276902018144e-16	8.06270978540603	6	32410987	G	A	-0.0284	0.0027	1.3270888490465e-26	-10.5185	5.29839e-27	2.73722795756307e-23
rs9271055	6	32575369	T	G	7.20559583121811	13239	0.24096	0.113588318256199	0.0138306315415556	8.21280777489523	2.16075312238558e-16	6	32575369	T	G	-10.5	450243	0.8436	-0.03111	0.00333869646697017	-9.31801	1.18541165679784e-20	6	32575369	T	G	0.359106	0.0498371	5.7782988562822e-13	7.20559583121811	6	32575369	T	G	-0.0273	0.0026	4.47301134824449e-26	-10.5	6.5455e-27	1.77012068976198e-23
rs10947129	6	31011662	A	G	5.39535990073395	13239	0.24096	0.089541904601328	0.0138306315415556	6.47417323874833	9.53324754767918e-11	6	31011662	A	G	-10.4815	450243	0.1475	-0.0316383	0.00341995501455357	-9.2511	2.22201835984354e-20	6	31011662	A	G	0.220019	0.0407793	6.83911647281429e-08	5.39535990073395	6	31011662	A	G	-0.0283	0.0027	1.48388416376901e-26	-10.4815	8.08316e-27	5.68071292389052e-24
rs1475865	6	31657413	C	T	7.62301431092939	13239	0.24096	0.119084997253551	0.0138306315415556	8.61023568560462	7.29105206782624e-18	6	31657413	C	T	-10.4762	450243	0.7227	-0.0252183	0.00270900393146397	-9.30906	1.28964259249658e-20	6	31657413	C	T	0.30016	0.0393755	2.47856321539419e-14	7.62301431092939	6	31657413	C	T	-0.022	0.0021	1.20586863727985e-25	-10.4762	8.58487e-27	3.04507013774333e-23
rs3115667	6	31643399	C	T	7.60123910038886	13239	0.24096	0.11879612634458	0.0138306315415556	8.58934937191006	8.74631863143849e-18	6	31643399	C	T	-10.4762	450243	0.7213	-0.0251776	0.00270481238911368	-9.30845	1.29708825553323e-20	6	31643399	C	T	0.300835	0.0395771	2.93359394121412e-14	7.60123910038886	6	31643399	C	T	-0.022	0.0021	9.39074396851364e-26	-10.4762	8.58487e-27	2.9974523748722e-23
rs3130617	6	31627523	T	C	7.60435276093916	13239	0.24096	0.118837432303561	0.0138306315415556	8.59233592815349	8.52188060340349e-18	6	31627523	T	C	-10.4762	450243	0.7222	-0.0252029	0.00270750167957827	-9.30854	1.29602099348177e-20	6	31627523	T	C	0.29881	0.0392946	2.86285927087212e-14	7.60435276093916	6	31627523	T	C	-0.022	0.0021	9.48636869866469e-26	-10.4762	8.58487e-27	3.00421584028673e-23
rs9270986	6	32574060	C	A	7.21482043134989	13239	0.24096	0.113644763403708	0.0138306315415556	8.21688894409847	2.08850307330089e-16	6	32574060	C	A	-10.4615	450243	0.8432	-0.0309672	0.00333522601259801	-9.28488	1.61889845913616e-20	6	32574060	C	A	0.359679	0.0498528	5.40007759066593e-13	7.21482043134989	6	32574060	C	A	-0.0272	0.0026	7.18952171866639e-26	-10.4615	1.01412e-26	2.62482063747621e-23
rs3117572	6	31717692	G	A	8.24061735807061	13239	0.24096	0.127247536870296	0.0138306315415556	9.2004140583145	3.56573085073864e-20	6	31717692	G	A	-10.4583	450243	0.8088	-0.0287138	0.00308389144497058	-9.31091	1.26747250323225e-20	6	31717692	G	A	0.393932	0.0478037	1.71316818271581e-16	8.24061735807061	6	31717692	G	A	-0.0251	0.0024	1.03992016582906e-25	-10.4583	1.05173e-26	5.68472646818176e-23
rs9267577	6	31813774	C	T	8.15846323413636	13239	0.24096	0.126157676617859	0.0138306315415556	9.1216135892858	7.40140056365287e-20	6	31813774	C	T	-10.4583	450243	0.8116	-0.0288693	0.00310135962723808	-9.3086	1.29530547664939e-20	6	31813774	C	T	0.388608	0.0476325	3.39312610162932e-16	8.15846323413636	6	31813774	C	T	-0.0251	0.0024	1.72107580775885e-25	-10.4583	1.05173e-26	5.35843746544175e-23
rs9267649	6	31824828	G	A	8.21724398773765	13239	0.24096	0.126937464702625	0.0138306315415556	9.17799	4.39193133571834e-20	6	31824828	G	A	-10.4583	450243	0.8115	-0.0288685	0.00310072790780181	-9.31025	1.27533040592717e-20	6	31824828	G	A	0.392154	0.0477233	2.08209240522012e-16	8.21724398773765	6	31824828	G	A	-0.0251	0.0024	1.67301563639865e-25	-10.4583	1.05173e-26	5.58994368795971e-23
rs12528584	6	31011845	T	C	5.39362490006719	13239	0.24096	0.0894554010061474	0.0138306315415556	6.46791874524088	9.93618983486872e-11	6	31011845	T	C	-10.4444	450243	0.1474	-0.031537	0.00342091427689941	-9.21889	3.00181586624619e-20	6	31011845	T	C	0.219938	0.0407774	6.90478245397707e-08	5.39362490006719	6	31011845	T	C	-0.0282	0.0027	1.77214804513512e-26	-10.4444	1.23133e-26	8.27203662662188e-24
rs3104404	6	32682174	A	C	-7.00485	13239	0.24096	-0.0759171	0.0138306315415556	-5.48905	4.04096853417113e-08	6	32682174	A	C	-9.92308	450243	0.1522	-0.0284199	0.00337605540368913	-8.41807	3.82738990552346e-17	6	32682174	A	C	-0.315259	0.0450058	2.47229334606234e-12	-7.00485	6	32682174	A	C	-0.0258	0.0026	5.66761054941849e-23	-9.92308	1.39594e-26	1.74569541841837e-25
rs2242656	6	31614102	T	C	5.44690173169205	13239	0.24096	0.0901145585682946	0.0138306315415556	6.51557799783298	7.24102847332572e-11	6	31614102	T	C	-10.4167	450243	0.8007	-0.0279182	0.0030358131221469	-9.19627	3.70575867473833e-20	6	31614102	T	C	0.234963	0.043137	5.12530836604988e-08	5.44690173169205	6	31614102	T	C	-0.025	0.0024	2.98126100817224e-26	-10.4167	1.68673e-26	1.14014025277368e-23
rs2272593	6	31601344	C	T	7.44141548067024	13239	0.24096	0.11651264683158	0.0138306315415556	8.42424631742269	3.63079740659912e-17	6	31601344	C	T	-10.381	450243	0.7216	-0.0249501	0.0027057067165176	-9.22128	2.9356899181548e-20	6	31601344	C	T	0.291289	0.0391443	9.96322641954418e-14	7.44141548067024	6	31601344	C	T	-0.0218	0.0021	2.83726564866257e-25	-10.381	2.52484e-26	6.9202105308925e-23
rs2523882	6	31042217	T	C	6.1225684618961	13239	0.24096	0.0988312498177646	0.0138306315415556	7.1458233502075	8.94580427693053e-13	6	31042217	T	C	-10.2727	450243	0.2546	-0.0253056	0.00278381072439323	-9.09029	9.87775282520847e-20	6	31042217	T	C	0.213336	0.0348442	9.20831145245499e-10	6.1225684618961	6	31042217	T	C	-0.0226	0.0022	1.45713570473042e-25	-10.2727	8.50052e-26	7.88364558950097e-23
rs3130542	6	31232111	G	A	5.05416149540887	13239	0.24096	0.0846373897289459	0.0138306315415556	6.11956073550537	9.38336610571379e-10	6	31232111	G	A	-10.2609	450243	0.7929	-0.027084	0.00299270796211816	-9.04999	1.42983652625114e-19	6	31232111	G	A	0.212575	0.0420594	4.32304742611721e-07	5.05416149540887	6	31232111	G	A	-0.0236	0.0023	2.63208554434411e-24	-10.2609	9.7023e-26	4.11468076080734e-23
rs9264508	6	31233214	C	T	5.07325571998346	13239	0.24096	0.084890694559165	0.0138306315415556	6.13787550511354	8.3632360298444e-10	6	31233214	C	T	-10.2609	450243	0.793	-0.0270904	0.00299324200429923	-9.05052	1.42283186583801e-19	6	31233214	C	T	0.213441	0.0420718	3.91065946666132e-07	5.07325571998346	6	31233214	C	T	-0.0236	0.0023	2.53512863049791e-24	-10.2609	9.7023e-26	4.17176371628994e-23
rs2227956	6	31778272	A	G	8.1512861404845	13239	0.24096	0.125705350603637	0.0138306315415556	9.08890893564342	1.00037864471147e-19	6	31778272	A	G	-10.25	450243	0.8088	-0.0281483	0.00308389144497058	-9.12753	7.00795486736972e-20	6	31778272	A	G	0.387429	0.0475298	3.60080829173483e-16	8.1512861404845	6	31778272	A	G	-0.0246	0.0024	8.87769049411735e-25	-10.25	1.09512e-25	4.17222439530128e-22
rs3763313	6	32376471	C	A	10.2442225647446	13239	0.24096	0.149470657089353	0.0138306315415556	10.8072185019355	3.18171391972588e-27	6	32376471	C	A	-7.91667	450243	0.1918	-0.0220562	0.00308020678361936	-7.16061	8.03202670207213e-13	6	32376471	C	A	0.389471	0.0380186	1.25602996369488e-24	10.2442225647446	6	32376471	C	A	-0.019	0.0024	2.12422247738869e-15	-7.91667	1.16785e-25	6.90496352381964e-13
rs3828886	6	31440552	G	T	6.87382491636886	13239	0.24096	0.108702597174331	0.0138306315415556	7.85955412431616	3.85503222928412e-15	6	31440552	G	T	-10.2174	450243	0.2248	-0.0263298	0.00290508311386512	-9.06335	1.26509869582495e-19	6	31440552	G	T	0.246782	0.0359017	6.2502875801513e-12	6.87382491636886	6	31440552	G	T	-0.0235	0.0023	1.83315842867086e-25	-10.2174	1.57356e-25	2.32783142882024e-22
rs2071473	6	32782605	T	C	8.06309272123226	13239	0.24096	0.124278250444156	0.0138306315415556	8.98572491579641	2.57034223082177e-19	6	32782605	T	C	-10.1	450243	0.3298	-0.0232022	0.00257950313512762	-8.99483	2.36597782170677e-19	6	32782605	T	C	0.266969	0.03311	7.43875062907566e-16	8.06309272123226	6	32782605	T	C	-0.0202	0.002	4.454510633599e-24	-10.1	5.74743e-25	1.68104162951178e-21
rs2857204	6	32744347	T	G	7.34154807880145	13239	0.24096	0.114706207210221	0.0138306315415556	8.29363481093207	1.09839323500047e-16	6	32744347	T	G	-10.1	450243	0.3287	-0.0231696	0.00258169790194832	-8.97457	2.84469759025362e-19	6	32744347	T	G	0.244279	0.0332735	2.11154334065884e-13	7.34154807880145	6	32744347	T	G	-0.0202	0.002	7.63659924136157e-24	-10.1	5.74743e-25	1.01702978157667e-21
rs2394953	6	31233353	A	G	4.49652718626645	13239	0.24096	0.0769416753808022	0.0138306315415556	5.56313536006093	2.6497019801844e-08	6	31233353	A	G	-10.087	450243	0.7872	-0.0263216	0.00296302450299508	-8.88334	6.48799431871673e-19	6	31233353	A	G	0.184765	0.0410906	6.90780389619431e-06	4.49652718626645	6	31233353	A	G	-0.0232	0.0023	5.65978586242697e-24	-10.087	6.63108e-25	1.55384811119943e-22
rs9275522	6	32674970	T	C	8.91182095625636	13239	0.24096	0.135444017823812	0.0138306315415556	9.79304650093932	1.2060612423545e-22	6	32674970	T	C	-10.0455	450243	0.2271	-0.0259686	0.00289463211861329	-8.97131	2.93004443810468e-19	6	32674970	T	C	0.328512	0.0368625	5.01995703378949e-19	8.91182095625636	6	32674970	T	C	-0.0221	0.0022	6.534313996496e-23	-10.0455	1.04394e-24	5.09168833129749e-21
rs9275523	6	32674994	A	C	8.91288482043296	13239	0.24096	0.135458131093172	0.0138306315415556	9.7940669365801	1.19394632122156e-22	6	32674994	A	C	-10.0455	450243	0.2271	-0.0259687	0.00289463211861329	-8.97134	2.92924965192156e-19	6	32674994	A	C	0.328512	0.0368581	4.97164373725243e-19	8.91288482043296	6	32674994	A	C	-0.0221	0.0022	6.534313996496e-23	-10.0455	1.04394e-24	5.09540743903683e-21
rs1049225	6	32627747	G	A	10.0432331437102	13239	0.24096	0.148817148971434	0.0138306315415556	10.7599677226811	5.31887928826105e-27	6	32627747	G	A	-9.09091	450243	0.765	-0.0233805	0.00286021677047555	-8.17439	2.97366037994354e-16	6	32627747	G	A	0.433247	0.0431382	9.83784554914415e-24	10.0432331437102	6	32627747	G	A	-0.02	0.0022	2.50495541277256e-19	-9.09091	1.06955e-24	5.73150298036289e-17
rs7453967	6	31314243	T	G	5.19230648104019	13239	0.24096	0.0860914238957922	0.0138306315415556	6.22469217237992	4.8250240542501e-10	6	31314243	T	G	-10.04	450243	0.8334	-0.0288428	0.00325461297029859	-8.86212	7.85081526070774e-19	6	31314243	T	G	0.247308	0.0476297	2.07696893075311e-07	5.19230648104019	6	31314243	T	G	-0.0251	0.0025	2.71894235440222e-23	-10.04	1.10795e-24	4.03525966964631e-22
rs4294047	6	31101583	A	G	5.26465587200989	13239	0.24096	0.086982648166467	0.0138306315415556	6.28913060875913	3.19248793692511e-10	6	31101583	A	G	-10	450243	0.0709	-0.0417197	0.00472508091291148	-8.82942	1.05216195633393e-18	6	31101583	A	G	0.272467	0.051754	1.4045267014944e-07	5.26465587200989	6	31101583	A	G	-0.037	0.0037	4.96821063331393e-24	-10	1.71242e-24	6.27217534363951e-22
rs9275555	6	32677088	T	C	8.92288662478435	13239	0.24096	0.135512899610509	0.0138306315415556	9.7980268799256	1.1480628502216e-22	6	32677088	T	C	-10	450243	0.2272	-0.0258513	0.00289418226041163	-8.93216	4.17768405062125e-19	6	32677088	T	C	0.328944	0.0368652	4.54359904929339e-19	8.92288662478435	6	32677088	T	C	-0.022	0.0022	1.3589391171008e-22	-10	1.71242e-24	7.89861326366343e-21
rs3135006	6	32667119	C	T	9.9762937345735	13239	0.24096	0.147695380211826	0.0138306315415556	10.6788601639816	1.27831546146864e-26	6	32667119	C	T	-8.95455	450243	0.7636	-0.0229893	0.00285434787263008	-8.05413	8.0049256129918e-16	6	32667119	C	T	0.429246	0.0430266	1.93597613764143e-23	9.9762937345735	6	32667119	C	T	-0.0197	0.0022	8.37336456083653e-19	-8.95455	2.21473e-24	1.73624063466707e-16
rs2621323	6	32788707	G	A	6.91113048876014	13239	0.24096	0.108653438570966	0.0138306315415556	7.85599979614128	3.96595716345865e-15	6	32788707	G	A	-9.9	450243	0.3004	-0.0232499	0.00264538406333951	-8.78885	1.51102249992018e-18	6	32788707	G	A	0.233807	0.0338305	4.80839348449729e-12	6.91113048876014	6	32788707	G	A	-0.0198	0.002	3.74369103989045e-22	-9.9	5.04715e-24	5.14799530329815e-21
rs2073724	6	31129707	T	C	5.63814078691181	13239	0.24096	0.0917568788801506	0.0138306315415556	6.63432314023096	3.25994959942944e-11	6	31129707	T	C	-9.89474	450243	0.0655	-0.0428833	0.00490177412076556	-8.74853	2.16154101694378e-18	6	31129707	T	C	0.302029	0.0535689	1.7189767393851e-08	5.63814078691181	6	31129707	T	C	-0.0376	0.0038	3.98107170553499e-23	-9.89474	5.34101e-24	2.25102963962354e-21
rs17190776	6	31130865	A	G	5.63704061949728	13239	0.24096	0.0916971748266627	0.0138306315415556	6.63000634144208	3.35672449117061e-11	6	31130865	A	G	-9.86842	450243	0.0655	-0.0427712	0.00490177412076556	-8.72565	2.64654476161081e-18	6	31130865	A	G	0.301881	0.0535531	1.72997568852687e-08	5.63704061949728	6	31130865	A	G	-0.0375	0.0038	5.58470194736831e-23	-9.86842	7.08457e-24	2.89484060341974e-21
rs9262651	6	31029455	T	C	5.09192572245299	13239	0.24096	0.0844574547516068	0.0138306315415556	6.1065508467813	1.01807212969794e-09	6	31029455	T	C	-9.86364	450243	0.2385	-0.0247749	0.00284566945293312	-8.70619	3.14265522110827e-18	6	31029455	T	C	0.182405	0.0358224	3.5443777370305e-07	5.09192572245299	6	31029455	T	C	-0.0217	0.0022	8.53886210214843e-23	-9.86364	7.45737e-24	2.07864756543646e-21
rs3873380	6	31262438	T	C	4.61022563102691	13239	0.24096	0.078056069133162	0.0138306315415556	5.64370968155966	1.66424617958802e-08	6	31262438	T	C	-9.85714	450243	0.2892	-0.023236	0.00267479648354234	-8.68702	3.72061942603075e-18	6	31262438	T	C	0.157004	0.0340556	4.02253655998683e-06	4.61022563102691	6	31262438	T	C	-0.0207	0.0021	1.86982085773664e-23	-9.85714	7.99458e-24	1.58389444987188e-21
rs130072	6	31112484	T	C	5.61204398751524	13239	0.24096	0.0912753500304203	0.0138306315415556	6.59950702584864	4.12527203197793e-11	6	31112484	T	C	-9.81579	450243	0.0654	-0.042574	0.00490525777646899	-8.67926	3.98365481132428e-18	6	31112484	T	C	0.300993	0.0536334	1.99953955595982e-08	5.61204398751524	6	31112484	T	C	-0.0373	0.0038	9.37993869618491e-23	-9.81579	1.24371e-23	4.70352051807278e-21
rs2856997	6	32781776	A	C	5.41806945533367	13239	0.24096	0.0885667477305712	0.0138306315415556	6.40366620023553	1.51689560776563e-10	6	32781776	A	C	-9.73684	450243	0.3883	-0.0214129	0.00248834539182926	-8.60527	7.61373733101811e-18	6	32781776	A	C	0.17622	0.0325245	6.02517964170327e-08	5.41806945533367	6	32781776	A	C	-0.0185	0.0019	7.35190692071564e-22	-9.73684	2.87663e-23	8.71359728700997e-21
rs13501	6	32793523	A	G	6.88400591217708	13239	0.24096	0.107975260780789	0.0138306315415556	7.80696531871057	5.85813812939585e-15	6	32793523	A	G	-9.71429	450243	0.2958	-0.0229229	0.00265715263452932	-8.62686	6.30612977811765e-18	6	32793523	A	G	0.233807	0.0339638	5.81969198981766e-12	6.88400591217708	6	32793523	A	G	-0.0204	0.0021	4.68381787850244e-23	-9.71429	3.65084e-23	2.90874383000286e-20
rs2857103	6	32791299	A	C	6.8892192214291	13239	0.24096	0.107962794630538	0.0138306315415556	7.80606397518092	5.90016389037007e-15	6	32791299	A	C	-9.66667	450243	0.2944	-0.0228449	0.00266081946272505	-8.58566	9.03148875927358e-18	6	32791299	A	C	0.234044	0.0339725	5.61047976032471e-12	6.8892192214291	6	32791299	A	C	-0.0203	0.0021	7.33668714418361e-23	-9.66667	6.02738e-23	4.54719758887741e-20
rs3094738	6	31407913	A	G	5.18599468240974	13239	0.24096	0.0852963194672169	0.0138306315415556	6.16720351568436	6.95082735703795e-10	6	31407913	A	G	-9.625	450243	0.9128	-0.0365444	0.00429850601985448	-8.50166	1.869051983684e-17	6	31407913	A	G	0.38581	0.0743946	2.14872085987256e-07	5.18599468240974	6	31407913	A	G	-0.0308	0.0032	1.43086941274934e-21	-9.625	9.32766e-23	2.13291580075927e-20
rs3135365	6	32389255	A	C	5.76281405609386	13239	0.24096	0.0928899939688517	0.0138306315415556	6.7162510757194	1.86459406609249e-11	6	32389255	A	C	-9.59091	450243	0.7716	-0.024521	0.00288881305575786	-8.48826	2.09756008595262e-17	6	32389255	A	C	0.243729	0.0422934	8.27256141461797e-09	5.76281405609386	6	32389255	A	C	-0.0211	0.0022	4.32314696910883e-21	-9.59091	1.33146e-22	4.32139116554128e-20
rs13195441	6	32743298	A	G	7.81433644811281	13239	0.24096	0.120072188513478	0.0138306315415556	8.68161284990553	3.90195642638946e-18	6	32743298	A	G	-9.57143	450243	0.2634	-0.023482	0.00275321327490332	-8.52896	1.4766794981591e-17	6	32743298	A	G	0.270866	0.0346627	5.52458932613277e-15	7.81433644811281	6	32743298	A	G	-0.0201	0.0021	4.33610709449186e-21	-9.57143	1.63081e-22	2.01942306762329e-19
rs241451	6	32796480	C	T	6.61178916702886	13239	0.24096	0.104119142938075	0.0138306315415556	7.52815535756538	5.14621408727994e-14	6	32796480	C	T	-9.57143	450243	0.2952	-0.0225863	0.00265871920816035	-8.49519	1.97611044453997e-17	6	32796480	C	T	0.225142	0.0340516	3.79751938971332e-11	6.61178916702886	6	32796480	C	T	-0.0201	0.0021	2.14980961038936e-22	-9.57143	1.63081e-22	9.11783462351413e-20
rs9268103	6	32245370	G	A	7.02443344318462	13239	0.24096	0.10957370993621	0.0138306315415556	7.92253843267993	2.3271012737603e-15	6	32245370	G	A	-9.56	450243	0.828	-0.027305	0.00321354366658444	-8.49686	1.94795167058191e-17	6	32245370	G	A	0.338695	0.0482167	2.14931465541918e-12	7.02443344318462	6	32245370	G	A	-0.0239	0.0025	1.02093948370768e-21	-9.56	1.83649e-22	1.33136702698339e-19
rs9268148	6	32259527	A	G	7.02156462754269	13239	0.24096	0.109535652100644	0.0138306315415556	7.91978672640744	2.37918316954306e-15	6	32259527	A	G	-9.56	450243	0.828	-0.0273048	0.00321354366658444	-8.49678	1.94930362541368e-17	6	32259527	A	G	0.338695	0.0482364	2.19381499189791e-12	7.02156462754269	6	32259527	A	G	-0.0239	0.0025	1.04111810762334e-21	-9.56	1.83649e-22	1.32884325461541e-19
rs2395185	6	32433167	T	G	4.68350641344809	13239	0.24096	0.0784160191781036	0.0138306315415556	5.66973524979638	1.43018349258904e-08	6	32433167	T	G	-9.5	450243	0.3569	-0.0212102	0.00253134342035606	-8.37902	5.33681761371428e-17	6	32433167	T	G	0.158029	0.0337416	2.82020059577399e-06	4.68350641344809	6	32433167	T	G	-0.019	0.002	5.3938640990449e-22	-9.5	3.41832e-22	4.87867112763645e-20
rs35464393	6	32530198	C	T	7.26065282965203	13239	0.24096	0.112570274877047	0.0138306315415556	8.13919990123501	3.97898548804797e-16	6	32530198	C	T	-9.48	450243	0.8301	-0.0272356	0.00322925024418958	-8.43404	3.33940662882209e-17	6	32530198	C	T	0.388018	0.0534412	3.85212170598102e-13	7.26065282965203	6	32530198	C	T	-0.0237	0.0025	1.31613367118573e-20	-9.48	4.20124e-22	3.2264699444147e-19
rs3130575	6	31113106	G	A	4.51116272384079	13239	0.24096	0.0760517842838074	0.0138306315415556	5.4987933165092	3.82399031052316e-08	6	31113106	G	A	-9.45455	450243	0.751	-0.0233741	0.00280442581000016	-8.33472	7.76800113089756e-17	6	31113106	G	A	0.178887	0.0396543	6.44688613851572e-06	4.51116272384079	6	31113106	G	A	-0.0208	0.0022	1.37911346902361e-21	-9.45455	5.45881e-22	6.62418357366987e-20
rs2256436	6	31031381	G	A	6.05419799019863	13239	0.24096	0.0965139669894863	0.0138306315415556	6.97827620521157	2.98823744221665e-12	6	31031381	G	A	-9.45	450243	0.3581	-0.021182	0.00252945961029485	-8.37411	5.56424354196821e-17	6	31031381	G	A	0.198031	0.0327097	1.41123714841185e-09	6.05419799019863	6	31031381	G	A	-0.0189	0.002	5.19756584658364e-22	-9.45	5.7197e-22	1.92018623599635e-19
rs2517500	6	31033509	T	C	6.04594481362442	13239	0.24096	0.0964044799829451	0.0138306315415556	6.97035993571858	3.16131121823665e-12	6	31033509	T	C	-9.45	450243	0.3581	-0.0211814	0.00252945961029485	-8.37388	5.57520398879276e-17	6	31033509	T	C	0.197703	0.0327001	1.48549091472815e-09	6.04594481362442	6	31033509	T	C	-0.0189	0.002	4.70218812091843e-22	-9.45	5.7197e-22	1.90977802778179e-19
rs2517502	6	31032937	T	C	6.04625914417831	13239	0.24096	0.0964086499060165	0.0138306315415556	6.97066143482648	3.15454303893111e-12	6	31032937	T	C	-9.45	450243	0.3581	-0.0211814	0.00252945961029485	-8.37389	5.57478615932602e-17	6	31032937	T	C	0.197703	0.0326984	1.48258635919887e-09	6.04625914417831	6	31032937	T	C	-0.0189	0.002	4.77089655425648e-22	-9.45	5.7197e-22	1.91017341178512e-19
rs2523881	6	31042608	G	T	6.0420751271644	13239	0.24096	0.0963531445507086	0.0138306315415556	6.96664821568019	3.24580922362122e-12	6	31042608	G	T	-9.45	450243	0.3582	-0.0211798	0.00252930353103599	-8.37377	5.5803503696315e-17	6	31042608	G	T	0.197539	0.0326939	1.52163328611689e-09	6.0420751271644	6	31042608	G	T	-0.0189	0.002	5.9593651925594e-22	-9.45	5.7197e-22	1.90491712274085e-19
rs2523884	6	31041155	T	C	6.04369592674938	13239	0.24096	0.096374646149901	0.0138306315415556	6.96820285178829	3.21015146446406e-12	6	31041155	T	C	-9.45	450243	0.3581	-0.0211812	0.00252945961029485	-8.37382	5.5781942627297e-17	6	31041155	T	C	0.197621	0.0326987	1.50629488034797e-09	6.04369592674938	6	31041155	T	C	-0.0189	0.002	5.95662143529009e-22	-9.45	5.7197e-22	1.90695159974229e-19
rs2523891	6	31038976	T	C	6.04430592682763	13239	0.24096	0.0963827384379984	0.0138306315415556	6.96878795074585	3.19683112599841e-12	6	31038976	T	C	-9.45	450243	0.3581	-0.0211813	0.00252945961029485	-8.37383	5.5773830085572e-17	6	31038976	T	C	0.197621	0.0326954	1.50058292381183e-09	6.04430592682763	6	31038976	T	C	-0.0189	0.002	5.37526648786744e-22	-9.45	5.7197e-22	1.90771784638282e-19
rs9268853	6	32429643	C	T	4.67058840961963	13239	0.24096	0.0781589409171263	0.0138306315415556	5.65114764877434	1.59380113281847e-08	6	32429643	C	T	-9.45	450243	0.3577	-0.0210889	0.00253008531762714	-8.33525	7.73321132595008e-17	6	32429643	C	T	0.157602	0.0337435	3.00344718934633e-06	4.67058840961963	6	32429643	C	T	-0.0189	0.002	8.83486667395859e-22	-9.45	5.7197e-22	7.68237074626435e-20
rs9268858	6	32429758	C	T	4.67555905903829	13239	0.24096	0.0782248817728104	0.0138306315415556	5.65591538880747	1.55017825187989e-08	6	32429758	C	T	-9.45	450243	0.3575	-0.0210919	0.00253039900645495	-8.33539	7.72409260180288e-17	6	32429758	C	T	0.157773	0.0337442	2.93163568869153e-06	4.67555905903829	6	32429758	C	T	-0.0189	0.002	6.67421203858478e-22	-9.45	5.7197e-22	7.70783130762998e-20
rs3817973	6	32361111	T	C	6.37837201958975	13239	0.24096	0.100764853941486	0.0138306315415556	7.28562926708932	3.20172309517376e-13	6	32361111	T	C	-9.42105	450243	0.4486	-0.0203801	0.00243837547705984	-8.35808	6.37451387606324e-17	6	32361111	T	C	0.206038	0.0323026	1.78969901882554e-10	6.37837201958975	6	32361111	T	C	-0.0179	0.0019	3.6399884030888e-21	-9.42105	7.69602e-22	3.09210023081191e-19
rs653178	12	112007756	T	C	-5.16157	13239	0.24096	-0.0846227	0.0138306315415556	-6.1185	9.4460838307108e-10	12	112007756	T	C	9.42105263157895	450243	0.5163	0.0202000268884089	0.00242674694314629	8.32391154152213	8.51071293561113e-17	12	112007756	T	C	-0.166616	0.0322801	2.44911963425911e-07	-5.16157	12	112007756	T	C	0.0179	0.0019	1.81008929527076e-21	9.42105263157895	7.69602e-22	1.38857847849126e-19
rs2073721	6	31129616	G	A	4.79327155387235	13239	0.24096	0.0797163366743827	0.0138306315415556	5.76375246747528	8.2264042830037e-09	6	31129616	G	A	-9.40909	450243	0.7486	-0.0232114	0.0027954778108618	-8.30318	1.01357975604866e-16	6	31129616	G	A	0.189467	0.0395277	1.64081644471042e-06	4.79327155387235	6	31129616	G	A	-0.0207	0.0022	2.13993213245595e-21	-9.40909	8.69787e-22	1.2145128281869e-19
rs2199874	6	32769926	G	A	6.64627792259165	13239	0.24096	0.104282818187903	0.0138306315415556	7.53998961468783	4.70008886535191e-14	6	32769926	G	A	-9.4	450243	0.3024	-0.0220403	0.00264039844357685	-8.34733	6.98230508388379e-17	6	32769926	G	A	0.225142	0.0338749	3.00607630262823e-11	6.64627792259165	6	32769926	G	A	-0.0188	0.002	3.95457667078465e-20	-9.4	9.54464e-22	4.45755095779529e-19
rs2219893	6	32769663	C	T	6.89434889434889	13239	0.24096	0.10757373870357	0.0138306315415556	7.77793395625881	7.3718534790677e-15	6	32769663	C	T	-9.4	450243	0.3024	-0.0220587	0.00264039844357685	-8.3543	6.58233255396242e-17	6	32769663	C	T	0.235704	0.034188	5.41127991844283e-12	6.89434889434889	6	32769663	C	T	-0.0188	0.002	4.40453433678405e-20	-9.4	9.54464e-22	5.23916905912795e-19
rs2517477	6	31044863	A	G	6.04014609704319	13239	0.24096	0.0962418465023984	0.0138306315415556	6.95860100193034	3.43668313471305e-12	6	31044863	A	G	-9.4	450243	0.3582	-0.0210699	0.00252930353103599	-8.33031	8.06321603170586e-17	6	31044863	A	G	0.197456	0.0326906	1.53964288723534e-09	6.04014609704319	6	31044863	A	G	-0.0188	0.002	9.6917008394729e-22	-9.4	9.54464e-22	2.99968217517292e-19
rs2517478	6	31044802	T	G	6.04051565377532	13239	0.24096	0.0962467490584002	0.0138306315415556	6.95895547280082	3.42804830814999e-12	6	31044802	T	G	-9.4	450243	0.3582	-0.0210699	0.00252930353103599	-8.33032	8.0625091715106e-17	6	31044802	T	G	0.197456	0.0326886	1.53606643721463e-09	6.04051565377532	6	31044802	T	G	-0.0188	0.002	9.78813611335182e-22	-9.4	9.54464e-22	3.00040840468521e-19
rs2517489	6	31042306	A	G	6.04238931610598	13239	0.24096	0.0962716051459937	0.0138306315415556	6.96075	3.38459579202928e-12	6	31042306	A	G	-9.4	450243	0.3582	-0.02107	0.00252930353103599	-8.33037	8.05892631199622e-17	6	31042306	A	G	0.197539	0.0326922	1.5186580620136e-09	6.04238931610598	6	31042306	A	G	-0.0188	0.002	7.27444726711483e-22	-9.4	9.54464e-22	3.00409308124289e-19
rs2517504	6	31032370	G	T	6.01685398415579	13239	0.24096	0.0959328522996048	0.0138306315415556	6.93625970812426	4.02617151030282e-12	6	31032370	G	T	-9.4	450243	0.3609	-0.0210336	0.00252514166389143	-8.32965	8.10789095649877e-17	6	31032370	G	T	0.196635	0.0326807	1.77832035690695e-09	6.01685398415579	6	31032370	G	T	-0.0188	0.002	8.95364765549597e-22	-9.4	9.54464e-22	2.95425870417751e-19
rs2523843	6	31046528	G	A	6.03997981126593	13239	0.24096	0.0962396405479009	0.0138306315415556	6.95844150418862	3.44057541541131e-12	6	31046528	G	A	-9.4	450243	0.3582	-0.0210699	0.00252930353103599	-8.3303	8.06353411051307e-17	6	31046528	G	A	0.197456	0.0326915	1.54116806042366e-09	6.03997981126593	6	31046528	G	A	-0.0188	0.002	9.2087355206331e-22	-9.4	9.54464e-22	2.99935545753856e-19
rs2523883	6	31042070	T	C	6.04306757058415	13239	0.24096	0.0962806028999883	0.0138306315415556	6.96140321652723	3.3689997559185e-12	6	31042070	T	C	-9.4	450243	0.3581	-0.0210714	0.00252945961029485	-8.33039	8.05762972553949e-17	6	31042070	T	C	0.197621	0.0327021	1.51230713101172e-09	6.04306757058415	6	31042070	T	C	-0.0188	0.002	6.07435262863583e-22	-9.4	9.54464e-22	3.00542801377357e-19
rs9368726	6	32438542	C	T	4.68626881765023	13239	0.24096	0.0782812504564861	0.0138306315415556	5.65999102942491	1.5138090782231e-08	6	32438542	C	T	-9.4	450243	0.3572	-0.0209867	0.00253087058523427	-8.29229	1.11092114992624e-16	6	32438542	C	T	0.1582	0.0337582	2.78253092644261e-06	4.68626881765023	6	32438542	C	T	-0.0188	0.002	1.34989503505597e-21	-9.4	9.54464e-22	1.22992090908754e-19
rs9405108	6	32438648	T	C	4.68642672730287	13239	0.24096	0.0782833452929428	0.0138306315415556	5.66014249296802	1.5124735842672e-08	6	32438648	T	C	-9.4	450243	0.3572	-0.0209867	0.00253087058523427	-8.29229	1.11087972003564e-16	6	32438648	T	C	0.158285	0.0337752	2.78022535702965e-06	4.68642672730287	6	32438648	T	C	-0.0188	0.002	1.37404197501252e-21	-9.4	9.54464e-22	1.2300494880265e-19
rs12665745	6	31441901	A	G	4.82289846084456	13239	0.24096	0.0800815414426342	0.0138306315415556	5.79015796943332	7.03202561976622e-09	6	31441901	A	G	-9.39286	450243	0.129	-0.0299923	0.00361792587603379	-8.28992	1.13322501799061e-16	6	31441901	A	G	0.205305	0.0425688	1.41478354500126e-06	4.82289846084456	6	31441901	A	G	-0.0263	0.0028	5.36908154464722e-21	-9.39286	1.02668e-21	1.4373746366041e-19
rs9268472	6	32355605	A	G	6.37379954303689	13239	0.24096	0.100613976897175	0.0138306315415556	7.27472036218084	3.47138782405959e-13	6	32355605	A	G	-9.36842	450243	0.4484	-0.0202693	0.00243847701746752	-8.31226	9.38940910305546e-17	6	32355605	A	G	0.205875	0.0323002	1.84391119044779e-10	6.37379954303689	6	32355605	A	G	-0.0178	0.0019	5.48024532176852e-21	-9.36842	1.31707e-21	4.96459122388627e-19
rs2395165	6	32388144	T	C	5.65171678046998	13239	0.24096	0.0910265932678685	0.0138306315415556	6.58152109644229	4.65659418504e-11	6	32388144	T	C	-9.36364	450243	0.7665	-0.0237577	0.00286658005885335	-8.28783	1.15332949770488e-16	6	32388144	T	C	0.23813	0.0421341	1.58847359500096e-08	5.65171678046998	6	32388144	T	C	-0.0206	0.0022	1.80094313444193e-20	-9.36364	1.38279e-21	3.23585143020613e-19
rs2894249	6	32325835	T	C	4.78567514892531	13239	0.24096	0.0795376465665169	0.0138306315415556	5.75083258689507	8.88050195684297e-09	6	32325835	T	C	-9.36364	450243	0.7539	-0.0232657	0.00281547009616345	-8.26351	1.41451925494947e-16	6	32325835	T	C	0.191282	0.0399697	1.7041977987174e-06	4.78567514892531	6	32325835	T	C	-0.0206	0.0022	4.04482745379999e-21	-9.36364	1.38279e-21	1.83233089454174e-19
rs3129907	6	32323745	A	G	4.9318744230807	13239	0.24096	0.0814771326228069	0.0138306315415556	5.89106378678371	3.83717392875056e-09	6	32323745	A	G	-9.36364	450243	0.7542	-0.0232868	0.00281662736356405	-8.26761	1.36665983352019e-16	6	32323745	A	G	0.200893	0.0407336	8.14441696715644e-07	4.9318744230807	6	32323745	A	G	-0.0206	0.0022	5.72268709222843e-21	-9.36364	1.38279e-21	2.01751050276838e-19
rs3129941	6	32337686	G	A	4.78380880880881	13239	0.24096	0.0795128876157412	0.0138306315415556	5.74904243358925	8.97502931921131e-09	6	32337686	G	A	-9.36364	450243	0.7539	-0.0232655	0.00281547009616345	-8.26346	1.41514077468305e-16	6	32337686	G	A	0.191161	0.03996	1.72016457666693e-06	4.78380880880881	6	32337686	G	A	-0.0206	0.0022	3.86722998119376e-21	-9.36364	1.38279e-21	1.8300789934791e-19
rs3132958	6	32297901	G	A	4.89934731546587	13239	0.24096	0.0810456265702984	0.0138306315415556	5.85986448462516	4.63245048585131e-09	6	32297901	G	A	-9.36364	450243	0.7539	-0.0232746	0.00281547009616345	-8.2667	1.37716778016943e-16	6	32297901	G	A	0.194192	0.0396363	9.61590136697607e-07	4.89934731546587	6	32297901	G	A	-0.0206	0.0022	3.78181256110951e-21	-9.36364	1.38279e-21	1.97477412065262e-19
rs3132959	6	32298942	A	G	4.8967776262006	13239	0.24096	0.0810115369585149	0.0138306315415556	5.85739969394072	4.70170614273949e-09	6	32298942	A	G	-9.36364	450243	0.7538	-0.0232713	0.00281508496061164	-8.26663	1.37800131045732e-16	6	32298942	A	G	0.194192	0.0396571	9.7422663757881e-07	4.8967776262006	6	32298942	A	G	-0.0206	0.0022	4.28153994337416e-21	-9.36364	1.38279e-21	1.9714362635921e-19
rs3135377	6	32385399	G	A	5.66460438660033	13239	0.24096	0.0911975608224831	0.0138306315415556	6.59388261110638	4.28470544192789e-11	6	32385399	G	A	-9.36364	450243	0.7663	-0.0237517	0.00286572708568042	-8.28819	1.14982619864133e-16	6	32385399	G	A	0.238511	0.0421055	1.47363524494056e-08	5.66460438660033	6	32385399	G	A	-0.0206	0.0022	1.65882281537504e-20	-9.36364	1.38279e-21	3.26325719489051e-19
rs2106067	6	31048263	C	T	6.03833963557155	13239	0.24096	0.0961321744552305	0.0138306315415556	6.95067135339344	3.63551914022634e-12	6	31048263	C	T	-9.35	450243	0.3583	-0.0209587	0.00252914759066664	-8.28685	1.16287519547859e-16	6	31048263	C	T	0.197374	0.0326868	1.55700497412465e-09	6.03833963557155	6	31048263	C	T	-0.0187	0.002	1.20309521637573e-21	-9.35	1.58844e-21	4.71238591988629e-19
rs2523836	6	31047145	T	C	6.03944406381521	13239	0.24096	0.0961468258493029	0.0138306315415556	6.95173069721505	3.60831732223482e-12	6	31047145	T	C	-9.35	450243	0.3582	-0.02096	0.00252930353103599	-8.28688	1.16257210829649e-16	6	31047145	T	C	0.197456	0.0326944	1.5463222322497e-09	6.03944406381521	6	31047145	T	C	-0.0187	0.002	1.30196707006414e-21	-9.35	1.58844e-21	4.71577773863021e-19
rs2535311	6	31052684	G	A	6.05654229198219	13239	0.24096	0.096373651702637	0.0138306315415556	6.96813094999111	3.21179212803294e-12	6	31052684	G	A	-9.35	450243	0.3582	-0.0209613	0.00252930353103599	-8.28736	1.15788978328823e-16	6	31052684	G	A	0.197949	0.0326835	1.39084905573384e-09	6.05654229198219	6	31052684	G	A	-0.0187	0.002	1.21087691616688e-21	-9.35	1.58844e-21	4.76859697726665e-19
rs2535315	6	31052127	T	C	6.03695759270762	13239	0.24096	0.0961138402132907	0.0138306315415556	6.94934572759793	3.66984189424666e-12	6	31052127	T	C	-9.35	450243	0.3582	-0.0209599	0.00252930353103599	-8.28681	1.1632545779267e-16	6	31052127	T	C	0.197292	0.0326807	1.57047128489981e-09	6.03695759270762	6	31052127	T	C	-0.0187	0.002	1.31008658625703e-21	-9.35	1.58844e-21	4.70814491120656e-19
rs2844641	6	31037794	C	T	6.0165041948927	13239	0.24096	0.095842504530573	0.0138306315415556	6.9297272682454	4.21652724483845e-12	6	31037794	C	T	-9.35	450243	0.3609	-0.0209239	0.00252514166389143	-8.28624	1.1688834973923e-16	6	31037794	C	T	0.196635	0.0326826	1.78217357532112e-09	6.0165041948927	6	31037794	C	T	-0.0187	0.002	8.54673030766976e-22	-9.35	1.58844e-21	4.64581959223873e-19
rs2905759	6	31044468	T	C	6.04113275635341	13239	0.24096	0.0961692281194244	0.0138306315415556	6.9533504547839	3.56711060853938e-12	6	31044468	T	C	-9.35	450243	0.3582	-0.0209602	0.00252930353103599	-8.28693	1.16210883262016e-16	6	31044468	T	C	0.197539	0.032699	1.5305587341205e-09	6.04113275635341	6	31044468	T	C	-0.0187	0.002	9.9609325659808e-22	-9.35	1.58844e-21	4.72096855979461e-19
rs9271574	6	32590590	G	T	4.97790266657709	13239	0.24096	0.0820643705839661	0.0138306315415556	5.9335230164577	2.96502411429964e-09	6	32590590	G	T	-9.35	450243	0.3492	-0.0210053	0.00254391565427545	-8.25707	1.49293605213553e-16	6	32590590	G	T	0.170418	0.0342349	6.42806115674165e-07	4.97790266657709	6	32590590	G	T	-0.0187	0.002	3.00815354394422e-21	-9.35	1.58844e-21	2.35478424823916e-19
rs2076529	6	32363955	C	T	6.36007664234706	13239	0.24096	0.100341709920354	0.0138306315415556	7.25503456721164	4.01559270304179e-13	6	32363955	C	T	-9.31579	450243	0.4488	-0.0201552	0.00243827434359371	-8.26619	1.38313791207576e-16	6	32363955	C	T	0.205468	0.0323059	2.01636894474903e-10	6.36007664234706	6	32363955	C	T	-0.0177	0.0019	7.93048960128198e-21	-9.31579	2.24725e-21	7.90252033033851e-19
rs2076533	6	32363527	T	C	6.08724347863633	13239	0.24096	0.096722293067791	0.0138306315415556	6.99333886360709	2.68420120935451e-12	6	32363527	T	C	-9.31579	450243	0.4488	-0.0201365	0.00243827434359371	-8.25852	1.47486177761807e-16	6	32363527	T	C	0.197374	0.0324242	1.14860314211146e-09	6.08724347863633	6	32363527	T	C	-0.0177	0.0019	8.1865326831557e-21	-9.31579	2.24725e-21	6.62177165533694e-19
rs4424066	6	32354428	G	A	6.3670930365774	13239	0.24096	0.100434789717458	0.0138306315415556	7.26176454167627	3.8207287388135e-13	6	32354428	G	A	-9.31579	450243	0.4488	-0.0201557	0.00243827434359371	-8.26638	1.38085481790858e-16	6	32354428	G	A	0.205631	0.0322959	1.92646001782794e-10	6.3670930365774	6	32354428	G	A	-0.0177	0.0019	6.79047258205189e-21	-9.31579	2.24725e-21	7.93849648979092e-19
rs9268460	6	32351283	C	T	6.37050290674278	13239	0.24096	0.100480025206333	0.0138306315415556	7.26503521581277	3.72941099201339e-13	6	32351283	C	T	-9.31579	450243	0.4488	-0.0201559	0.00243827434359371	-8.26648	1.3797466079377e-16	6	32351283	C	T	0.205794	0.0323042	1.88403948354786e-10	6.37050290674278	6	32351283	C	T	-0.0177	0.0019	6.62369002243109e-21	-9.31579	2.24725e-21	7.95603876879324e-19
rs2517497	6	31036783	G	A	6.01668828943503	13239	0.24096	0.0957592392877867	0.0138306315415556	6.92370691823202	4.39975707448985e-12	6	31036783	G	A	-9.3	450243	0.3613	-0.0208093	0.00252453361934396	-8.24283	1.68179252737833e-16	6	31036783	G	A	0.196635	0.0326816	1.78016394214465e-09	6.01668828943503	6	31036783	G	A	-0.0186	0.002	1.47706633533782e-21	-9.3	2.63639e-21	7.29043469779235e-19
rs2517510	6	31030122	G	T	6.01821979346008	13239	0.24096	0.09577955628812	0.0138306315415556	6.92517590395926	4.35434119838557e-12	6	31030122	G	T	-9.3	450243	0.3613	-0.0208094	0.00252453361934396	-8.24288	1.68118785982253e-16	6	31030122	G	T	0.1968	0.0327007	1.76359963389799e-09	6.01821979346008	6	31030122	G	T	-0.0186	0.002	1.56314764264095e-21	-9.3	2.63639e-21	7.29767362958386e-19
rs2517511	6	31029918	C	A	6.01125468307975	13239	0.24096	0.0956871568248449	0.0138306315415556	6.91849511986075	4.56466514337082e-12	6	31029918	C	A	-9.3	450243	0.3613	-0.0208089	0.00252453361934396	-8.24268	1.68393955107647e-16	6	31029918	C	A	0.196553	0.0326975	1.84077200146896e-09	6.01125468307975	6	31029918	C	A	-0.0186	0.002	1.42200132151888e-21	-9.3	2.63639e-21	7.26480894630433e-19
rs2517516	6	31028920	C	T	6.01108922760747	13239	0.24096	0.09568496188521	0.0138306315415556	6.91833641852971	4.56978056676213e-12	6	31028920	C	T	-9.3	450243	0.3613	-0.0208089	0.00252453361934396	-8.24268	1.68400497117878e-16	6	31028920	C	T	0.196553	0.0326984	1.84268033034496e-09	6.01108922760747	6	31028920	C	T	-0.0186	0.002	1.39894293717817e-21	-9.3	2.63639e-21	7.26403002944115e-19
rs2517523	6	31026434	G	A	6.02085626911315	13239	0.24096	0.0958145318910867	0.0138306315415556	6.9277047547107	4.27723224400704e-12	6	31026434	G	A	-9.3	450243	0.3612	-0.0208109	0.0025246854251716	-8.24295	1.68014743003057e-16	6	31026434	G	A	0.196882	0.0327	1.73496213144223e-09	6.02085626911315	6	31026434	G	A	-0.0186	0.002	1.41807760996892e-21	-9.3	2.63639e-21	7.31015204525894e-19
rs2535304	6	31054687	C	T	6.02065269620521	13239	0.24096	0.0958118312838595	0.0138306315415556	6.92750949195505	4.2831381357181e-12	6	31054687	C	T	-9.3	450243	0.3618	-0.0208034	0.00252377664026487	-8.24295	1.68022774318637e-16	6	31054687	C	T	0.196717	0.0326737	1.73696073067805e-09	6.02065269620521	6	31054687	C	T	-0.0186	0.002	2.02115676696075e-21	-9.3	2.63639e-21	7.30918778613264e-19
rs2621366	6	32768980	A	C	6.6455912912062	13239	0.24096	0.104102294407183	0.0138306315415556	7.52693715354909	5.19443557537197e-14	6	32768980	A	C	-9.3	450243	0.3041	-0.0217765	0.00263622193394532	-8.2605	1.45068842815052e-16	6	32768980	A	C	0.225142	0.0338784	3.02064717004684e-11	6.6455912912062	6	32768980	A	C	-0.0186	0.002	9.93116048420934e-20	-9.3	2.63639e-21	1.09472568346265e-18
rs3117111	6	32338400	T	C	4.77999019176108	13239	0.24096	0.0793063979468642	0.0138306315415556	5.73411255361547	9.80242237514218e-09	6	32338400	T	C	-9.27273	450243	0.7538	-0.0230399	0.00281508496061164	-8.18443	2.73605460473685e-16	6	32338400	T	C	0.191039	0.0399664	1.7529519021615e-06	4.77999019176108	6	32338400	T	C	-0.0204	0.0022	8.65964323360065e-21	-9.27273	3.47164e-21	4.17159302203046e-19
rs3129931	6	32335516	T	C	4.78257606272658	13239	0.24096	0.0793407022258008	0.0138306315415556	5.7365928654388	9.66000933113956e-09	6	32335516	T	C	-9.27273	450243	0.753	-0.0230149	0.00281201499827818	-8.1845	2.73440529305602e-16	6	32335516	T	C	0.191161	0.0399703	1.73077255524446e-06	4.78257606272658	6	32335516	T	C	-0.0204	0.0022	7.31139083483419e-21	-9.27273	3.47164e-21	4.17863689666309e-19
rs3130501	6	31136453	G	A	4.79640550407189	13239	0.24096	0.0795241642081565	0.0138306315415556	5.74985776818777	8.93185566550665e-09	6	31136453	G	A	-9.27273	450243	0.7476	-0.0228506	0.00279179982578252	-8.18489	2.72560126587937e-16	6	31136453	G	A	0.189588	0.0395271	1.61536251231858e-06	4.79640550407189	6	31136453	G	A	-0.0204	0.0022	4.12477249784665e-21	-9.27273	3.47164e-21	4.2165080218365e-19
rs3132528	6	31131569	T	C	4.78427076586788	13239	0.24096	0.0793631842328497	0.0138306315415556	5.7382183882489	9.56776915106391e-09	6	31131569	T	C	-9.27273	450243	0.7477	-0.0228526	0.00279216630510257	-8.18455	2.73332491472251e-16	6	31131569	T	C	0.189105	0.0395264	1.71616879122418e-06	4.78427076586788	6	31131569	T	C	-0.0204	0.0022	5.10975409054677e-21	-9.27273	3.47164e-21	4.18325961554716e-19
rs2246330	6	31041493	A	G	6.01541244196616	13239	0.24096	0.0956566063895174	0.0138306315415556	6.91628622323621	4.63637194192147e-12	6	31041493	A	G	-9.25	450243	0.3606	-0.0207084	0.00252559913588719	-8.19939	2.41609881635723e-16	6	31041493	A	G	0.196553	0.0326749	1.79423779211038e-09	6.01541244196616	6	31041493	A	G	-0.0185	0.002	2.90669859029883e-21	-9.25	4.36388e-21	1.14014840785496e-18
rs2249231	6	31043232	A	G	6.01482338324444	13239	0.24096	0.0956487919103846	0.0138306315415556	6.9157212107775	4.65489042247147e-12	6	31043232	A	G	-9.25	450243	0.3613	-0.0206996	0.00252453361934396	-8.19937	2.41643130300147e-16	6	31043232	A	G	0.196553	0.0326781	1.80081873399417e-09	6.01482338324444	6	31043232	A	G	-0.0185	0.002	2.55328915153389e-21	-9.25	4.36388e-21	1.13971565892541e-18
rs2523895	6	31047471	C	A	6.01352861056272	13239	0.24096	0.0956316153985533	0.0138306315415556	6.9144792926641	4.69584993487752e-12	6	31047471	C	A	-9.25	450243	0.3613	-0.0206995	0.00252453361934396	-8.19934	2.4171622793728e-16	6	31047471	C	A	0.196471	0.0326715	1.8153484553014e-09	6.01352861056272	6	31047471	C	A	-0.0185	0.002	3.50509666806692e-21	-9.25	4.36388e-21	1.13876503096561e-18
rs9263474	6	31050244	C	A	6.01271885395659	13239	0.24096	0.0956208731314959	0.0138306315415556	6.91370259154057	4.72164554958541e-12	6	31050244	C	A	-9.25	450243	0.3614	-0.0206982	0.00252438195027665	-8.19931	2.41761954603598e-16	6	31050244	C	A	0.196471	0.0326759	1.82439973295748e-09	6.01271885395659	6	31050244	C	A	-0.0185	0.002	3.34888319394221e-21	-9.25	4.36388e-21	1.13817090206617e-18
rs2596573	6	31347930	T	C	4.51372361951291	13239	0.24096	0.0757147293209908	0.0138306315415556	5.47442313776473	4.38939103726046e-08	6	31347930	T	C	-9.2381	450243	0.7312	-0.0222855	0.00273546318288316	-8.14688	3.73428311498689e-16	6	31347930	T	C	0.172213	0.0381532	6.37000832620799e-06	4.51372361951291	6	31347930	T	C	-0.0194	0.0021	6.86119875281708e-20	-9.2381	4.91824e-21	4.7957962231494e-19
rs2844533	6	31350802	A	G	4.49293219521403	13239	0.24096	0.0754389093639421	0.0138306315415556	5.45448045067774	4.91162380064451e-08	6	31350802	A	G	-9.2381	450243	0.7308	-0.0222734	0.00273417809959549	-8.1463	3.75235003247266e-16	6	31350802	A	G	0.171382	0.0381448	7.02538291133013e-06	4.49293219521403	6	31350802	A	G	-0.0194	0.0021	7.07619838359787e-20	-9.2381	4.91824e-21	4.73128272976293e-19
rs9275582	6	32680070	T	C	8.9385596093856	13239	0.24096	0.134379310219719	0.0138306315415556	9.71606465084129	2.57543320695104e-22	6	32680070	T	C	-9.21739	450243	0.2224	-0.0240679	0.00291620520004444	-8.25317	1.54243111830576e-16	6	32680070	T	C	0.32952	0.036865	3.94275689595591e-19	8.9385596093856	6	32680070	T	C	-0.0212	0.0023	7.16473282391109e-21	-9.21739	6.05309e-21	9.7482634163005e-18
rs9275595	6	32681355	C	T	9.03714785826946	13239	0.24096	0.13568718630275	0.0138306315415556	9.81062837912089	1.01335536294834e-22	6	32681355	C	T	-9.21739	450243	0.2224	-0.024076	0.00291620520004444	-8.25594	1.50708754750814e-16	6	32681355	C	T	0.334041	0.0369631	1.60805167218626e-19	9.03714785826946	6	32681355	C	T	-0.0212	0.0023	6.37529081034908e-21	-9.21739	6.05309e-21	1.03697108822109e-17
rs4394274	6	31318164	A	C	5.17586983022535	13239	0.24096	0.0844515330847246	0.0138306315415556	6.10612269085333	1.02080549226912e-09	6	31318164	A	C	-9.21053	450243	0.3978	-0.0201729	0.00247776909926199	-8.14154	3.902713248165e-16	6	31318164	A	C	0.168561	0.0325667	2.26855858864991e-07	5.17586983022535	6	31318164	A	C	-0.0175	0.0019	7.65067934129094e-20	-9.21053	6.48381e-21	9.44215440985696e-19
rs2535318	6	31051388	T	C	6.01281086076988	13239	0.24096	0.0955363862488112	0.0138306315415556	6.90759391295776	4.92942627249546e-12	6	31051388	T	C	-9.2	450243	0.3613	-0.0205899	0.00252453361934396	-8.15591	3.46563103420028e-16	6	31051388	T	C	0.196471	0.0326754	1.82343379656277e-09	6.01281086076988	6	31051388	T	C	-0.0184	0.002	3.91922322454976e-21	-9.2	7.2038e-21	1.77717619549668e-18
rs9263473	6	31050179	G	A	6.01281086076988	13239	0.24096	0.0955363862488112	0.0138306315415556	6.90759391295776	4.92942627249546e-12	6	31050179	G	A	-9.2	450243	0.3613	-0.0205899	0.00252453361934396	-8.15591	3.46563103420028e-16	6	31050179	G	A	0.196471	0.0326754	1.82343379656277e-09	6.01281086076988	6	31050179	G	A	-0.0184	0.002	3.63161666207504e-21	-9.2	7.2038e-21	1.77717619549668e-18
rs2240059	6	31120614	T	C	4.64533783438187	13239	0.24096	0.0773642620750144	0.0138306315415556	5.59368976337524	2.22294014349368e-08	6	31120614	T	C	-9.18182	450243	0.7435	-0.0224987	0.00277702267773355	-8.10172	5.41872354727828e-16	6	31120614	T	C	0.181642	0.039102	3.39531443623172e-06	4.64533783438187	6	31120614	T	C	-0.0202	0.0022	6.6788240136654e-21	-9.18182	8.63834e-21	8.66724627996737e-19
rs4540292	6	31317182	G	T	5.18553497815788	13239	0.24096	0.0844895329984123	0.0138306315415556	6.10887020918418	1.00338882672018e-09	6	31317182	G	T	-9.15789	450243	0.3981	-0.0200578	0.00247745250260687	-8.09612	5.67388672057763e-16	6	31317182	G	T	0.168561	0.032506	2.15412053089001e-07	5.18553497815788	6	31317182	G	T	-0.0174	0.0019	1.10103214872977e-19	-9.15789	1.0964e-20	1.52016420808633e-18
rs2894381	6	32682228	A	G	-9.11933	13239	0.24096	-0.106966	0.0138306315415556	-7.734	1.04218110103037e-14	6	32682228	A	G	-8.17391	450243	0.2092	-0.0203946	0.00298160032466925	-6.84014	7.91170857187542e-12	6	32682228	A	G	-0.38126	0.0418079	7.55788013680451e-20	-9.11933	6	32682228	A	G	-0.0188	0.0023	9.80844136030906e-16	-8.17391	1.60809e-20	9.92583897089913e-19
rs10774625	12	111910219	G	A	-5.32379	13239	0.24096	-0.0862335	0.0138306315415556	-6.23496	4.51887407147374e-10	12	111910219	G	A	9.10526315789474	450243	0.5035	0.0195358677576931	0.00242551650144188	8.0543124510098	7.99268077860628e-16	12	111910219	G	A	-0.174457	0.0327693	1.01622529314919e-07	-5.32379	12	111910219	G	A	0.0173	0.0019	4.88202501086707e-20	9.10526315789474	1.84844e-20	2.64923675147959e-18
rs9262638	6	31025989	T	C	5.66267548618416	13239	0.24096	0.0906977014743856	0.0138306315415556	6.55774114160113	5.46289290079659e-11	6	31025989	T	C	-9.08696	450243	0.2247	-0.0233836	0.00290554207797752	-8.04794	8.4201641125679e-16	6	31025989	T	C	0.205631	0.0363134	1.49028729836205e-08	5.66267548618416	6	31025989	T	C	-0.0209	0.0023	1.39411949403475e-20	-9.08696	2.21513e-20	3.86256766434723e-18
rs3130502	6	31136666	G	A	4.70335742906373	13239	0.24096	0.0779002050031972	0.0138306315415556	5.63244019400977	1.7767746950862e-08	6	31136666	G	A	-9.04545	450243	0.7458	-0.0222401	0.00278525289836091	-7.98497	1.40562164262804e-15	6	31136666	G	A	0.184524	0.0392324	2.55917509090989e-06	4.70335742906373	6	31136666	G	A	-0.0199	0.0022	3.047894989628e-20	-9.04545	3.33423e-20	3.02621856735831e-18
rs3132523	6	31136832	C	T	4.68740528687095	13239	0.24096	0.0776885831772368	0.0138306315415556	5.61713924225463	1.94144965499511e-08	6	31136832	C	T	-9.04545	450243	0.7458	-0.0222389	0.00278525289836091	-7.98452	1.41073557271929e-15	6	31136832	C	T	0.184043	0.0392633	2.76687793495915e-06	4.68740528687095	6	31136832	C	T	-0.0199	0.0022	3.36201773454378e-20	-9.04545	3.33423e-20	2.99563937146833e-18
rs3132524	6	31136714	C	T	4.69594577376857	13239	0.24096	0.0778018816552734	0.0138306315415556	5.6253310936315	1.85152497199173e-08	6	31136714	C	T	-9.04545	450243	0.7458	-0.0222396	0.00278525289836091	-7.98476	1.40799539242612e-15	6	31136714	C	T	0.184283	0.039243	2.65356664794167e-06	4.69594577376857	6	31136714	C	T	-0.0199	0.0022	2.90469140738191e-20	-9.04545	3.33423e-20	3.01197277624535e-18
rs9263804	6	31135706	T	C	4.70942828741111	13239	0.24096	0.0779807412793345	0.0138306315415556	5.63826323078834	1.71773793554137e-08	6	31135706	T	C	-9.04545	450243	0.7458	-0.0222406	0.00278525289836091	-7.98514	1.40368025040647e-15	6	31135706	T	C	0.184765	0.039233	2.4842768936968e-06	4.70942828741111	6	31135706	T	C	-0.0199	0.0022	3.97374505061463e-20	-9.04545	3.33423e-20	3.03793678388313e-18
rs2394423	6	31032042	A	G	5.64672475986342	13239	0.24096	0.0904115702147933	0.0138306315415556	6.53705291353774	6.27428558006446e-11	6	31032042	A	G	-9.04348	450243	0.2245	-0.02328	0.00290646115999882	-8.00974	1.14948834094991e-15	6	31032042	A	G	0.205224	0.0363439	1.63527199778183e-08	5.64672475986342	6	31032042	A	G	-0.0208	0.0023	2.61095868658592e-20	-9.04348	3.39963e-20	5.60076901636009e-18
rs9262636	6	31025848	G	A	5.66404453854859	13239	0.24096	0.0906413351671296	0.0138306315415556	6.55366567280661	5.61415830246563e-11	6	31025848	G	A	-9.04348	450243	0.2245	-0.0232814	0.00290646115999882	-8.01023	1.1449510364577e-15	6	31025848	G	A	0.205713	0.0363191	1.47852952007417e-08	5.66404453854859	6	31025848	G	A	-0.0208	0.0023	2.35396499330744e-20	-9.04348	3.39963e-20	5.66237174943351e-18
rs9262639	6	31026009	T	C	5.66657121143701	13239	0.24096	0.0906748541217496	0.0138306315415556	6.55608920310741	5.52371970797618e-11	6	31026009	T	C	-9.04348	450243	0.2245	-0.0232816	0.00290646115999882	-8.0103	1.14429059415866e-15	6	31026009	T	C	0.205794	0.0363172	1.4568673151346e-08	5.66657121143701	6	31026009	T	C	-0.0208	0.0023	2.35288120193817e-20	-9.04348	3.39963e-20	5.67141430757492e-18
rs9262648	6	31029173	A	C	5.67344242440924	13239	0.24096	0.0907660079378437	0.0138306315415556	6.56267992283124	5.28492114457925e-11	6	31029173	A	C	-9.04348	450243	0.2245	-0.0232822	0.00290646115999882	-8.01049	1.14249643805977e-15	6	31029173	A	C	0.206119	0.0363305	1.39952287067858e-08	5.67344242440924	6	31029173	A	C	-0.0208	0.0023	2.38396568586535e-20	-9.04348	3.39963e-20	5.69607743403893e-18
rs9262656	6	31034264	G	A	5.64435982236701	13239	0.24096	0.0903801968490582	0.0138306315415556	6.53478	6.37011889592698e-11	6	31034264	G	A	-9.04348	450243	0.2245	-0.0232798	0.00290646115999882	-8.00968	1.15010926219108e-15	6	31034264	G	A	0.205142	0.0363446	1.65783002160516e-08	5.64435982236701	6	31034264	G	A	-0.0208	0.0023	2.78804641783178e-20	-9.04348	3.39963e-20	5.59240893975653e-18
rs3131382	6	31707730	C	T	5.7554009396115	13239	0.24096	0.091829161166072	0.0138306315415556	6.63954938645869	3.14643568058175e-11	6	31707730	C	T	-9.02941	450243	0.9164	-0.0350542	0.00438145058996597	-8.00058	1.23831857308714e-15	6	31707730	C	T	0.441144	0.0766487	8.64350723786153e-09	5.7554009396115	6	31707730	C	T	-0.0307	0.0034	1.37784384335145e-19	-9.02941	3.90327e-20	6.78352833615391e-18
rs9262616	6	31022195	T	C	5.87070216739688	13239	0.24096	0.0933083362220322	0.0138306315415556	6.7465	1.51455536218119e-11	6	31022195	T	C	-9	450243	0.2244	-0.0231923	0.00290692127872744	-7.97829	1.4837845117928e-15	6	31022195	T	C	0.217206	0.0369983	4.33940315092653e-09	5.87070216739688	6	31022195	T	C	-0.0207	0.0023	3.41979442513708e-20	-9	5.20686e-20	9.42511988946416e-18
rs3135363	6	32389648	G	A	-8.98329	13239	0.24096	-0.129458	0.0138306315415556	-9.36021	7.95772129014848e-21	6	32389648	G	A	6	450243	0.2656	0.0149959340698673	0.0027458905851117	5.46122782574648	4.72852760862765e-08	6	32389648	G	A	-0.341083	0.0379686	2.62784654083849e-19	-8.98329	6	32389648	G	A	0.0126	0.0021	3.42097578428851e-09	6	6.13042e-20	8.57022960653299e-08
rs2233976	6	31079994	T	C	7.62864033954315	13239	0.24096	0.11658160674567	0.0138306315415556	8.42923234527565	3.47940132808389e-17	6	31079994	T	C	-8.97222	450243	0.0723	-0.0374777	0.00468263892045438	-8.00354	1.20891788432271e-15	6	31079994	T	C	0.389674	0.0510804	2.37246601510481e-14	7.62864033954315	6	31079994	T	C	-0.0323	0.0036	6.06038200527065e-19	-8.97222	6.82964e-20	3.57336855791038e-17
rs910049	6	32315727	C	T	4.83135813486812	13239	0.24096	0.0793645204558672	0.0138306315415556	5.73831500155346	9.5623138743372e-09	6	32315727	C	T	-8.90909	450243	0.7499	-0.0220389	0.00280030331674196	-7.87017	3.54146466460847e-15	6	32315727	C	T	0.191645	0.0396669	1.35609464184308e-06	4.83135813486812	6	32315727	C	T	-0.0196	0.0022	2.17520403401952e-19	-8.90909	1.26132e-19	1.08261915142801e-17
rs477515	6	32569691	A	G	4.59304797675572	13239	0.24096	0.0761875041544264	0.0138306315415556	5.50860630807153	3.61685789524567e-08	6	32569691	A	G	-8.9	450243	0.3455	-0.0200338	0.00255026168516551	-7.85559	3.97895629377391e-15	6	32569691	A	G	0.15555	0.0338664	4.3682752907468e-06	4.59304797675572	6	32569691	A	G	-0.0178	0.002	2.54097270554931e-19	-8.9	1.37733e-19	1.00908650876714e-17
rs2076530	6	32363816	C	T	5.74673186370753	13239	0.24096	0.0914833039389583	0.0138306315415556	6.61454277514999	3.72701880728454e-11	6	32363816	C	T	-8.89474	450243	0.4539	-0.0192027	0.00243583248364674	-7.88342	3.18539731073857e-15	6	32363816	C	T	0.184985	0.0321896	9.09850420220999e-09	5.74673186370753	6	32363816	C	T	-0.0169	0.0019	4.86295219186786e-19	-8.89474	1.44925e-19	2.16857534184323e-17
rs2621373	6	32765130	C	T	6.84526876683452	13239	0.24096	0.105992101535432	0.0138306315415556	7.66357640408304	1.80825613272339e-14	6	32765130	C	T	-8.85714	450243	0.2914	-0.0210346	0.00266881364704762	-7.88163	3.2312825049602e-15	6	32765130	C	T	0.233807	0.034156	7.63484105183096e-12	6.84526876683452	6	32765130	C	T	-0.0186	0.0021	2.42325992409255e-19	-8.85714	2.08284e-19	5.88508054733322e-17
rs2857118	6	32777900	A	G	6.94291682903176	13239	0.24096	0.107287505060172	0.0138306315415556	7.75723832551068	8.67987251106868e-15	6	32777900	A	G	-8.85714	450243	0.2917	-0.0210356	0.00266800575474205	-7.88438	3.1611121657087e-15	6	32777900	A	G	0.236968	0.0341309	3.84149259178759e-12	6.94291682903176	6	32777900	A	G	-0.0186	0.0021	2.64972009887897e-19	-8.85714	2.08284e-19	6.24746028191809e-17
rs532098	6	32578052	A	G	6.87828253667333	13239	0.24096	0.106404286994156	0.0138306315415556	7.69337876397421	1.43299488987776e-14	6	32578052	A	G	-8.84211	450243	0.4572	-0.0191575	0.00243439230798044	-7.86951	3.56044912925122e-15	6	32578052	A	G	0.222769	0.0323873	6.05759173874994e-12	6.87828253667333	6	32578052	A	G	-0.0168	0.0019	5.73191841158761e-19	-8.84211	2.407e-19	6.82177484347387e-17
rs6904320	6	32312082	G	A	4.83800778571141	13239	0.24096	0.0792969032932008	0.0138306315415556	5.73342605903025	9.8421983442965e-09	6	32312082	G	A	-8.81818	450243	0.7497	-0.0218126	0.00279955766339949	-7.79144	6.62508100081996e-15	6	32312082	G	A	0.191887	0.0396624	1.31144475340681e-06	4.83800778571141	6	32312082	G	A	-0.0194	0.0022	4.27562886151586e-19	-8.81818	3.02828e-19	2.38396759707762e-17
rs2621338	6	32776583	A	G	6.92884641302246	13239	0.24096	0.107019220155186	0.0138306315415556	7.73784044738918	1.01119631832711e-14	6	32776583	A	G	-8.80952	450243	0.2919	-0.02092	0.002667468212565	-7.84264	4.41171455589288e-15	6	32776583	A	G	0.236494	0.0341318	4.2422865492295e-12	6.92884641302246	6	32776583	A	G	-0.0185	0.0021	3.8592241159473e-19	-8.80952	3.29018e-19	9.26600913441136e-17
rs2621342	6	32775004	T	C	6.91928762004059	13239	0.24096	0.106892412783464	0.0138306315415556	7.72867185871404	1.08674399295655e-14	6	32775004	T	C	-8.80952	450243	0.2916	-0.0209256	0.00266827484148029	-7.84237	4.42115905427177e-15	6	32775004	T	C	0.236257	0.0341447	4.53837104763082e-12	6.91928762004059	6	32775004	T	C	-0.0185	0.0021	4.37723637934767e-19	-8.80952	3.29018e-19	9.21227909167288e-17
rs2621358	6	32770808	T	C	6.88318224646375	13239	0.24096	0.106413437295973	0.0138306315415556	7.69404036079206	1.4256005217224e-14	6	32770808	T	C	-8.80952	450243	0.2917	-0.0209208	0.00266800575474205	-7.84136	4.45701263802603e-15	6	32770808	T	C	0.23523	0.0341746	5.85328943832558e-12	6.88318224646375	6	32770808	T	C	-0.0185	0.0021	3.98474009717776e-19	-8.80952	3.29018e-19	9.0120882627373e-17
rs3906263	6	31031904	A	G	5.88581629814483	13239	0.24096	0.0930616716510725	0.0138306315415556	6.72866393493736	1.7122801128108e-11	6	31031904	A	G	-8.73913	450243	0.2165	-0.0228266	0.00294452432695785	-7.75224	9.02888680033081e-15	6	31031904	A	G	0.21793	0.0370263	3.96095583490633e-09	5.88581629814483	6	31031904	A	G	-0.0201	0.0023	1.13788926434664e-18	-8.73913	6.4387e-19	8.89564088343556e-17
rs4394275	6	31318177	A	G	5.37725901568063	13239	0.24096	0.0863151281824933	0.0138306315415556	6.2408667256553	4.35152898781157e-10	6	31318177	A	G	-8.73913	450243	0.2202	-0.0226459	0.00292659970652859	-7.73795	1.0103005577444e-14	6	31318177	A	G	0.197867	0.036797	7.56327688794224e-08	5.37725901568063	6	31318177	A	G	-0.0201	0.0023	9.68500836147543e-19	-8.73913	6.4387e-19	6.52298477187415e-17
rs17426593	6	32608077	C	T	4.70634049548751	13239	0.24096	0.0772447689979496	0.0138306315415556	5.58505002218151	2.33632957315835e-08	6	32608077	C	T	-8.64	450243	0.1916	-0.0235207	0.00308143274041506	-7.63305	2.29263075987698e-14	6	32608077	C	T	0.196389	0.0417286	2.52208663072146e-06	4.70634049548751	6	32608077	C	T	-0.0216	0.0025	1.40701912289033e-18	-8.64	1.64234e-18	1.00155417296079e-16
rs17425622	6	32571961	C	T	4.88982375640755	13239	0.24096	0.0796531538418177	0.0138306315415556	5.75918414155501	8.4521458386469e-09	6	32571961	C	T	-8.625	450243	0.1912	-0.0235152	0.00308389144497058	-7.62518	2.43692216114938e-14	6	32571961	C	T	0.203757	0.0416696	1.00925288607668e-06	4.88982375640755	6	32571961	C	T	-0.0207	0.0024	8.27179951864135e-18	-8.625	1.89058e-18	1.27004441896998e-16
rs9267659	6	31846234	G	A	7.32811947882328	13239	0.24096	0.111971744976018	0.0138306315415556	8.09592422729121	5.68311923821404e-16	6	31846234	G	A	-8.6087	450243	0.783	-0.0225936	0.00294206896973959	-7.6795	1.59707439821128e-14	6	31846234	G	A	0.327671	0.0447142	2.33399542271947e-13	7.32811947882328	6	31846234	G	A	-0.0198	0.0023	4.35311359229638e-18	-8.6087	2.20255e-18	6.26275522804369e-16
rs2246871	6	31481146	A	C	5.00798051672779	13239	0.24096	0.0810920654918886	0.0138306315415556	5.8632221708921	4.53970146094934e-09	6	31481146	A	C	-8.55	450243	0.6639	-0.0194175	0.00256730819378125	-7.56339	3.92705524493623e-14	6	31481146	A	C	0.176021	0.0351481	5.5000925826179e-07	5.00798051672779	6	31481146	A	C	-0.0171	0.002	2.58226019063459e-18	-8.55	3.80781e-18	2.55237244887254e-16
rs3094682	6	31264461	C	A	6.3953167188768	13239	0.24096	0.0994822445164493	0.0138306315415556	7.19289240101178	6.34329323515724e-13	6	31264461	C	A	-8.54167	450243	0.8161	-0.0237758	0.00313040871460956	-7.59511	3.07520700917898e-14	6	31264461	C	A	0.298676	0.0467023	1.60217518145401e-10	6.3953167188768	6	31264461	C	A	-0.0205	0.0024	3.25536732471636e-17	-8.54167	4.11433e-18	6.24997206754212e-16
rs3806157	6	32373801	G	T	8.52579437504337	13239	0.24096	0.125616853956419	0.0138306315415556	9.08251033794008	1.06099008042591e-19	6	32373801	G	T	-7.3	450243	0.3626	-0.0165909	0.00252257256433777	-6.57698	4.80086103105154e-11	6	32373801	G	T	0.282619	0.0331487	1.5173997214348e-17	8.52579437504337	6	32373801	G	T	-0.0146	0.002	8.94128627502953e-14	-7.3	4.76707e-18	2.25719304307008e-11
rs2073048	6	32335433	A	G	8.51717072111601	13239	0.24096	0.124376011420604	0.0138306315415556	8.99279335487342	2.41025140395698e-19	6	32335433	A	G	-6.64286	450243	0.1263	-0.0219272	0.00365073873945707	-6.00624	1.89876768078025e-09	6	32335433	A	G	0.376585	0.0442148	1.63493315112983e-17	8.51717072111601	6	32335433	A	G	-0.0186	0.0028	5.09565480608115e-11	-6.64286	5.16354e-18	1.62447407751707e-09
rs2857212	6	32740411	G	A	6.14822990067069	13239	0.24096	0.0961329569511564	0.0138306315415556	6.95072793041406	3.6340612874657e-12	6	32740411	G	A	-8.5	450243	0.3651	-0.0190225	0.00251886572835423	-7.552	4.28617774536135e-14	6	32740411	G	A	0.210018	0.0341591	7.83573969132102e-10	6.14822990067069	6	32740411	G	A	-0.017	0.002	4.01143722208768e-18	-8.5	6.05241e-18	7.5991303165666e-16
rs7770048	6	32334754	T	C	8.49706102697699	13239	0.24096	0.124170454932634	0.0138306315415556	8.97793094693835	2.75906154138238e-19	6	32334754	T	C	-6.67857	450243	0.1262	-0.0220458	0.00365197587413695	-6.03668	1.57317826296883e-09	6	32334754	T	C	0.375418	0.0441821	1.94446441644812e-17	8.49706102697699	6	32334754	T	C	-0.0187	0.0028	4.20823515424824e-11	-6.67857	6.21901e-18	1.28965720662e-09
rs6457553	6	32330695	G	A	8.49688794332662	13239	0.24096	0.124106939190714	0.0138306315415556	8.97333855058035	2.87660260231448e-19	6	32330695	G	A	-6.64286	450243	0.1262	-0.0219326	0.00365197587413695	-6.00567	1.90544649867476e-09	6	32330695	G	A	0.375418	0.044183	1.9471526498539e-17	8.49688794332662	6	32330695	G	A	-0.0186	0.0028	4.63233543677957e-11	-6.64286	6.22896e-18	1.60982348558514e-09
rs2022544	6	32321004	T	C	8.4889154396374	13239	0.24096	0.124001175603115	0.0138306315415556	8.96569149648303	3.08340000973294e-19	6	32321004	T	C	-6.64286	450243	0.1262	-0.0219317	0.00365197587413695	-6.00545	1.9080779877456e-09	6	32321004	T	C	0.375143	0.0441921	2.08593129583111e-17	8.4889154396374	6	32321004	T	C	-0.0186	0.0028	4.48538782620793e-11	-6.64286	6.70479e-18	1.60410013462826e-09
rs2076523	6	32370835	C	T	8.46098189014918	13239	0.24096	0.124414218860151	0.0138306315415556	8.99555587800418	2.35039749492687e-19	6	32370835	C	T	-7.1	450243	0.3675	-0.0161023	0.00251538612398326	-6.40153	1.53825097542948e-10	6	32370835	C	T	0.278313	0.0328937	2.65155109300921e-17	8.46098189014918	6	32370835	C	T	-0.0142	0.002	3.14123190598618e-13	-7.1	8.67287e-18	8.41898349102176e-11
rs3806156	6	32373698	T	G	8.43781263969007	13239	0.24096	0.124106854555781	0.0138306315415556	8.97333243119726	2.87676248043645e-19	6	32373698	T	G	-7.1	450243	0.3675	-0.0161007	0.00251538612398326	-6.40088	1.54482150230854e-10	6	32373698	T	G	0.27748	0.0328853	3.23295753368093e-17	8.43781263969007	6	32373698	T	G	-0.0142	0.002	3.5391583956695e-13	-7.1	1.073e-17	8.32602211537985e-11
rs3130201	6	33064916	A	G	8.34383893107699	13239	0.24096	0.124763802723513	0.0138306315415556	9.02083193733031	1.86666265833696e-19	6	33064916	A	G	-8.21053	450243	0.3953	-0.0182619	0.00248044845144842	-7.36235	1.80694774814146e-13	6	33064916	A	G	0.274141	0.0328555	7.19283337825269e-17	8.34383893107699	6	33064916	A	G	-0.0156	0.0019	5.44502652842422e-16	-8.21053	2.52887e-17	2.68973865360999e-14
rs2395163	6	32387809	C	T	5.71286579688007	13239	0.24096	0.08994749224609	0.0138306315415556	6.50349855506114	7.8473175976163e-11	6	32387809	C	T	-8.26087	450243	0.2219	-0.0213993	0.00291855067690929	-7.33217	2.26451227308195e-13	6	32387809	C	T	0.218412	0.0382316	1.1107849835771e-08	5.71286579688007	6	32387809	C	T	-0.019	0.0023	5.13452177502966e-17	-8.26087	5.34823e-17	4.07319558343115e-15
rs3900938	6	31257622	C	T	5.13005629548263	13239	0.24096	0.082215915547342	0.0138306315415556	5.94448021410413	2.77335464230913e-09	6	31257622	C	T	-8.26087	450243	0.2251	-0.021243	0.00290370852421632	-7.31581	2.558427236228e-13	6	31257622	C	T	0.186811	0.036415	2.89640974500546e-07	5.13005629548263	6	31257622	C	T	-0.019	0.0023	2.81968114347069e-17	-8.26087	5.34823e-17	2.90989303382378e-15
rs2229092	6	31540757	C	A	5.3512319535922	13239	0.24096	0.0851423977194356	0.0138306315415556	6.15607446873384	7.45701697293411e-10	6	31540757	C	A	-8.25641	450243	0.062	-0.0368017	0.005028822809334	-7.31815	2.51421788936109e-13	6	31540757	C	A	0.319544	0.0597141	8.73554489405124e-08	5.3512319535922	6	31540757	C	A	-0.0322	0.0039	1.61101654274191e-16	-8.25641	5.56675e-17	3.42685123169099e-15
rs2857115	6	32778281	A	G	8.13225406284164	13239	0.24096	0.121362287416974	0.0138306315415556	8.77489122982761	1.71069132227796e-18	6	32778281	A	G	-7.86364	450243	0.2573	-0.0195727	0.00277419504941384	-7.05526	1.72281947507064e-12	6	32778281	A	G	0.287132	0.0353078	4.21405306391287e-16	8.13225406284164	6	32778281	A	G	-0.0173	0.0022	1.04809343336287e-15	-7.86364	1.68292e-16	3.32223819770191e-13
rs9275383	6	32668846	T	G	6.15000020233658	13239	0.24096	0.0954707822583766	0.0138306315415556	6.90285052938648	5.09692525547362e-12	6	32668846	T	G	-8.1	450243	0.1075	-0.0282083	0.0039152117280009	-7.20479	5.81338682806636e-13	6	32668846	T	G	0.303949	0.0494226	7.74836373837056e-10	6.15000020233658	6	32668846	T	G	-0.0243	0.003	1.30106801363285e-15	-8.1	2.23715e-16	1.85695694893251e-14
rs3104402	6	32681676	G	T	6.68424314517338	13239	0.24096	0.102337682253333	0.0138306315415556	7.39934991007813	1.36852804167893e-13	6	32681676	G	T	-7.97143	450243	0.9201	-0.0317929	0.00447273010323684	-7.10817	1.17589847574237e-12	6	32681676	G	T	0.534948	0.0800312	2.32113286066398e-11	6.68424314517338	6	32681676	G	T	-0.0279	0.0035	9.62276766092399e-16	-7.97143	6.8813e-16	6.7327545071953e-14
rs2395175	6	32405026	A	G	4.65961959980202	13239	0.24096	0.0754593462148086	0.0138306315415556	5.45595810199142	4.87094784252425e-08	6	32405026	A	G	-7.96	450243	0.1813	-0.0221646	0.00314776498598928	-7.04139	1.90329509992931e-12	6	32405026	A	G	0.197703	0.042429	3.16810815932805e-06	4.65961959980202	6	32405026	A	G	-0.0199	0.0025	6.98554026032695e-16	-7.96	7.59749e-16	2.39087971837597e-14
rs2516398	6	31481526	T	G	4.99974384225237	13239	0.24096	0.0799543080131078	0.0138306315415556	5.78095857538221	7.42761800171128e-09	6	31481526	T	G	-7.95	450243	0.6511	-0.0179185	0.00254442272102652	-7.04226	1.89144023244909e-12	6	31481526	T	G	0.175664	0.0351346	5.74076805016828e-07	4.99974384225237	6	31481526	T	G	-0.0159	0.002	1.02494367564987e-15	-7.95	8.28409e-16	3.12358073403804e-14
rs2523557	6	31331257	A	G	4.68596441112737	13239	0.24096	0.0757871852422899	0.0138306315415556	5.4796619383995	4.26139265117218e-08	6	31331257	A	G	-7.94737	450243	0.6172	-0.0175425	0.00249496624432566	-7.03117	2.04816003952107e-12	6	31331257	A	G	0.162401	0.0346569	2.78624947720557e-06	4.68596441112737	6	31331257	A	G	-0.0151	0.0019	6.35769954527187e-15	-7.94737	8.47472e-16	2.6759363843314e-14
rs28366298	6	32560859	C	A	4.76222341706311	13239	0.24096	0.0767332272396523	0.0138306315415556	5.54806387612157	2.88850354819666e-08	6	32560859	C	A	-7.90909	450243	0.2591	-0.0193755	0.00276789807461328	-7.00008	2.55824042073913e-12	6	32560859	C	A	0.162969	0.0342212	1.91469674948664e-06	4.76222341706311	6	32560859	C	A	-0.0174	0.0022	3.42294562316041e-15	-7.90909	1.17888e-15	3.75230836319421e-14
rs3763295	6	31587938	G	A	7.9020320998365	13239	0.24096	0.115297261085345	0.0138306315415556	8.33636994369502	7.66059902293273e-17	6	31587938	G	A	-6.10714	450243	0.1266	-0.0201458	0.00364703684440536	-5.52388	3.31596032121879e-08	6	31587938	G	A	0.355224	0.0449535	2.74410041825657e-15	7.9020320998365	6	31587938	G	A	-0.0171	0.0028	1.67301563639864e-09	-6.10714	1.25265e-15	3.0262670279569e-08
rs2269475	6	31583931	T	C	7.87166001356566	13239	0.24096	0.115139222067728	0.0138306315415556	8.32494320463815	8.4369183850721e-17	6	31583931	T	C	-6.25	450243	0.1265	-0.020602	0.00364826922771782	-5.64705	1.63225866030061e-08	6	31583931	T	C	0.353961	0.0449665	3.49945167028358e-15	7.87166001356566	6	31583931	T	C	-0.0175	0.0028	6.25302262399814e-10	-6.25	1.62548e-15	1.30790756139206e-08
rs2071475	6	32782387	A	G	4.98691543817912	13239	0.24096	0.079497192201494	0.0138306315415556	5.7479076036865	9.03545876251988e-09	6	32782387	A	G	-7.78261	450243	0.2093	-0.0205592	0.00298107645128039	-6.89658	5.32695454990802e-12	6	32782387	A	G	0.186563	0.0374105	6.13550055882684e-07	4.98691543817912	6	32782387	A	G	-0.0179	0.0023	1.10407861990207e-14	-7.78261	3.46933e-15	1.11470228841657e-13
rs2269425	6	32123639	A	G	7.56818213330006	13239	0.24096	0.113717458924015	0.0138306315415556	8.22214506852695	1.99895184910576e-16	6	32123639	A	G	-7.76923	450243	0.1479	-0.0237676	0.00341612872965711	-6.95746	3.46469856970401e-12	6	32123639	A	G	0.327504	0.0432738	3.78529734375595e-14	7.56818213330006	6	32123639	A	G	-0.0202	0.0026	2.51072993137352e-14	-7.76923	3.88497e-15	4.94149959508148e-13
rs2844494	6	31483415	A	C	5.00005708251277	13239	0.24096	0.0796156336756927	0.0138306315415556	5.75647131054565	8.58903711736253e-09	6	31483415	A	C	-7.75	450243	0.6497	-0.0174605	0.00254206760031817	-6.86864	6.48172402674438e-12	6	31483415	A	C	0.175187	0.035037	5.7312585380793e-07	5.00005708251277	6	31483415	A	C	-0.0155	0.002	3.90211442114136e-15	-7.75	4.56966e-15	1.43581617865734e-13
rs14365	6	31635710	C	T	7.6923492418689	13239	0.24096	0.113634693397582	0.0138306315415556	8.2161608496441	2.10121583592307e-16	6	31635710	C	T	-6.76	450243	0.1785	-0.0192701	0.00316694632902854	-6.08477	1.16656518895261e-09	6	31635710	C	T	0.299067	0.0388785	1.4444416411067e-14	7.6923492418689	6	31635710	C	T	-0.0169	0.0025	6.69422029309728e-12	-6.76	7.41615e-15	5.35894468232571e-10
rs189865	6	32914330	T	C	5.94724213657437	13239	0.24096	0.0920096177213432	0.0138306315415556	6.65259698697708	2.87965931726064e-11	6	32914330	T	C	-7.65	450243	0.31	-0.0178527	0.00262215406522471	-6.80842	9.86737874549405e-12	6	32914330	T	C	0.204735	0.0344252	2.72684215967329e-09	5.94724213657437	6	32914330	T	C	-0.0153	0.002	5.91561634175474e-14	-7.65	1.056e-14	5.02668381102982e-13
rs9461684	6	31253444	T	C	5.9349585124195	13239	0.24096	0.0918416210037518	0.0138306315415556	6.64045027356876	3.12726327697672e-11	6	31253444	T	C	-7.64706	450243	0.0856	-0.0294999	0.00433469561466331	-6.80553	1.00681052328864e-11	6	31253444	T	C	0.288182	0.0485567	2.93913815036842e-09	5.9349585124195	6	31253444	T	C	-0.026	0.0034	1.08592542131263e-14	-7.64706	1.08216e-14	5.10330520253394e-13
rs5010528	6	31241032	G	A	6.01190378323277	13239	0.24096	0.0927615480865048	0.0138306315415556	6.70696401735472	1.9871523716761e-11	6	31241032	G	A	-7.58824	450243	0.0851	-0.0293658	0.00434622297877463	-6.75662	1.41249639685563e-11	6	31241032	G	A	0.29252	0.0486568	1.83345392271319e-09	6.01190378323277	6	31241032	G	A	-0.0258	0.0034	1.89103688536449e-14	-7.58824	1.76201e-14	8.17938920922793e-13
rs11065987	12	112072424	G	A	5.53023962781997	13239	0.24096	0.0863558491459711	0.0138306315415556	6.24381098480613	4.27035999416136e-10	12	112072424	G	A	-7.57895	450243	0.4164	-0.0165688	0.00246008773298346	-6.73503	1.63898340163813e-11	12	112072424	G	A	0.179735	0.0325004	3.19808498219074e-08	5.53023962781997	12	112072424	G	A	-0.0144	0.0019	3.67959483014784e-14	-7.57895	1.90234e-14	6.79096137608208e-13
rs209475	6	32925585	A	G	5.73505980832798	13239	0.24096	0.0890233826441962	0.0138306315415556	6.43668240143017	1.22113070762492e-10	6	32925585	A	G	-7.55	450243	0.3168	-0.0175059	0.00260673619448677	-6.71565	1.87230653659301e-11	6	32925585	A	G	0.192932	0.0336408	9.74854947225352e-09	5.73505980832798	6	32925585	A	G	-0.0151	0.002	8.78820137717167e-14	-7.55	2.41408e-14	9.34409152513507e-13
rs3998159	6	32682019	C	A	6.6303458348756	13239	0.24096	0.100897522030503	0.0138306315415556	7.29522160483746	2.98167901408867e-13	6	32682019	C	A	-7.54839	450243	0.1036	-0.0268197	0.00397953928055547	-6.73939	1.59050813052764e-11	6	32682019	C	A	0.331388	0.0499805	3.34888319394222e-11	6.6303458348756	6	32682019	C	A	-0.0234	0.0031	3.46896565446054e-14	-7.54839	2.44627e-14	1.50942273888351e-12
rs3129763	6	32590925	A	G	-7.52712	13239	0.24096	-0.110215	0.0138306315415556	-7.96887	1.60130141150774e-15	6	32590925	A	G	6.04347826086957	450243	0.2257	0.0158337219167353	0.00290096967040696	5.45807909619203	4.81313252604269e-08	6	32590925	A	G	-0.29962	0.0398054	5.18680594557442e-14	-7.52712	6	32590925	A	G	0.0139	0.0023	6.95792911515072e-10	6.04347826086957	2.91241e-14	3.72814627512675e-08
rs3957146	6	32681530	C	T	6.35624077480641	13239	0.24096	0.0970953467589742	0.0138306315415556	7.02031186842342	2.21373555497808e-12	6	32681530	C	T	-7.45161	450243	0.1028	-0.0265456	0.00399321236897124	-6.64768	2.97751079661578e-11	6	32681530	C	T	0.318236	0.0500667	2.06761655109483e-10	6.35624077480641	6	32681530	C	T	-0.0231	0.0031	8.60993752184602e-14	-7.45161	5.3885e-14	2.62288097623683e-12
rs129653	6	32931536	C	T	5.79338059492365	13239	0.24096	0.0896256538879601	0.0138306315415556	6.48022858671855	9.15837606633209e-11	6	32931536	C	T	-7.45	450243	0.3195	-0.0172448	0.00260084278833738	-6.63047	3.34616506384413e-11	6	32931536	C	T	0.194332	0.0335438	6.89810816515948e-09	5.79338059492365	6	32931536	C	T	-0.0149	0.002	1.43284759806459e-13	-7.45	5.45943e-14	1.98432434712247e-12
rs7454108	6	32681483	C	T	6.35610302799048	13239	0.24096	0.0970382242751191	0.0138306315415556	7.01618172558189	2.28013455535886e-12	6	32681483	C	T	-7.41935	450243	0.1027	-0.0264451	0.00399493338385039	-6.61967	3.60001844541295e-11	6	32681483	C	T	0.318163	0.0500563	2.06937882100486e-10	6.35610302799048	6	32681483	C	T	-0.023	0.0031	1.08592542131263e-13	-7.41935	6.99541e-14	3.30005336809938e-12
rs3957148	6	32682137	G	A	6.62709815818332	13239	0.24096	0.100412077179561	0.0138306315415556	7.26012235073008	3.86740343109305e-13	6	32682137	G	A	-7.29032	450243	0.104	-0.0258836	0.00397276542879537	-6.51526	7.25637814898262e-11	6	32682137	G	A	0.331172	0.0499724	3.42294562316041e-11	6.62709815818332	6	32682137	G	A	-0.0226	0.0031	2.45697082763684e-13	-7.29032	1.96476e-13	9.38286814974578e-12
rs2395045	6	31484517	T	C	5.42641446822632	13239	0.24096	0.0842977613818126	0.0138306315415556	6.09500449263874	1.0943437799104e-09	6	31484517	T	C	-7.18182	450243	0.7559	-0.018033	0.00282323828734057	-6.38734	1.68794265982167e-10	6	31484517	T	C	0.222394	0.0409836	5.74976374358488e-08	5.42641446822632	6	31484517	T	C	-0.0158	0.0022	6.39440294529284e-13	-7.18182	4.61754e-13	1.09256671690153e-11
rs17630235	12	112591686	A	G	5.39099298791534	13239	0.24096	0.0836064133687924	0.0138306315415556	6.04501776492186	1.49393540158221e-09	12	112591686	A	G	-7.05263	450243	0.4088	-0.0154774	0.00246683976864072	-6.27419	3.51453303300975e-10	12	112591686	A	G	0.177058	0.0328433	7.00712717919767e-08	5.39099298791534	12	112591686	A	G	-0.0134	0.0019	2.57217196267279e-12	-7.05263	1.25616e-12	2.60987094580965e-11
rs206786	6	32935179	C	A	5.09244329950528	13239	0.24096	0.079645839958793	0.0138306315415556	5.75865532383597	8.47866281466355e-09	6	32935179	C	A	-7.05263	450243	0.379	-0.015663	0.00249975929767667	-6.26581	3.70896646283261e-10	6	32935179	C	A	0.166446	0.0326849	3.53459777715719e-07	5.09244329950528	6	32935179	C	A	-0.0134	0.0019	4.37925263541927e-12	-7.05263	1.25616e-12	2.25318202006965e-11
rs11066188	12	112610714	A	G	5.3958349990467	13239	0.24096	0.0835804293357232	0.0138306315415556	6.04313903415016	1.51144298783731e-09	12	112610714	A	G	-7	450243	0.4089	-0.0153645	0.00246674673763123	-6.22864	4.7051334602812e-10	12	112610714	A	G	0.175465	0.0325186	6.82071652116537e-08	5.3958349990467	12	112610714	A	G	-0.0133	0.0019	3.86633962109362e-12	-7	1.87877e-12	3.73949118016494e-11
rs206783	6	32932150	A	C	5.09071436221484	13239	0.24096	0.0795326854324754	0.0138306315415556	5.75047388064029	8.89936523149219e-09	6	32932150	A	C	-7	450243	0.379	-0.0155487	0.00249975929767667	-6.22007	4.96942158158111e-10	6	32932150	A	C	0.166362	0.0326795	3.56746729187344e-07	5.09071436221484	6	32932150	A	C	-0.0133	0.0019	7.35021427646795e-12	-7	1.87877e-12	3.22165873340138e-11
rs209474	6	32924584	G	A	4.99439465317299	13239	0.24096	0.0782549038996203	0.0138306315415556	5.65808608699429	1.53070356206179e-08	6	32924584	G	A	-7	450243	0.3776	-0.0155532	0.00250157087926457	-6.21736	5.05582024379663e-10	6	32924584	G	A	0.163054	0.0326474	5.90228260561873e-07	4.99439465317299	6	32924584	G	A	-0.0133	0.0019	7.870457896951e-12	-7	1.87877e-12	3.0732787368574e-11
rs3130304	6	32207181	A	G	-5.01565	13239	0.24096	-0.0783879	0.0138306315415556	-5.6677	1.44727008955308e-08	6	32207181	A	G	6.91304347826087	450243	0.2231	0.0178926266463096	0.00291293807069411	6.14246723139091	8.12494430628371e-10	6	32207181	A	G	-0.195772	0.0390322	5.2856694480099e-07	-5.01565	6	32207181	A	G	0.0159	0.0023	1.91778536448265e-12	6.91304347826087	3.62975e-12	5.58348421811593e-11
rs3130931	6	31134888	C	T	5.71251920206565	13239	0.24096	0.0871816238769061	0.0138306315415556	6.30351720490561	2.90965896035365e-10	6	31134888	C	T	-6.65	450243	0.6919	-0.0155855	0.00262661296123882	-5.93367	2.96228516670661e-09	6	31134888	C	T	0.209734	0.0367148	1.11321743614592e-08	5.71251920206565	6	31134888	C	T	-0.0133	0.002	7.76783514384352e-11	-6.65	2.53192e-11	4.34709394518418e-10
rs17696736	12	112486818	G	A	5.2798335232132	13239	0.24096	0.0814100200388414	0.0138306315415556	5.88621132695468	3.95148999729445e-09	12	112486818	G	A	-6.63158	450243	0.4297	-0.0144673	0.00244979212825233	-5.90553	3.51512907072128e-09	12	112486818	G	A	0.171008	0.0323889	1.2930937124604e-07	5.2798335232132	12	112486818	G	A	-0.0126	0.0019	3.04579030537343e-11	-6.63158	2.89275e-11	4.00536194069015e-10
rs7767167	6	32765182	A	G	6.62517157520962	13239	0.24096	0.0984286619024686	0.0138306315415556	7.1167149241688	1.10529765767425e-12	6	32765182	A	G	-6.14815	450243	0.8568	-0.0191239	0.00346220165433281	-5.52362	3.32087207017315e-08	6	32765182	A	G	0.355247	0.0536208	3.46816698755359e-11	6.62517157520962	6	32765182	A	G	-0.0166	0.0027	6.01201423194484e-10	-6.14815	3.0297e-11	1.4025820873779e-08
rs9263957	6	31184175	A	G	5.26983570997514	13239	0.24096	0.0812661113089851	0.0138306315415556	5.87580625402479	4.20790244213997e-09	6	31184175	A	G	-6.625	450243	0.0926	-0.0246818	0.00418368248248892	-5.89954	3.64519591096391e-09	6	31184175	A	G	0.249747	0.0473918	1.3655575256321e-07	5.26983570997514	6	31184175	A	G	-0.0212	0.0032	5.7676646339225e-11	-6.625	3.03345e-11	4.15853731519171e-10
rs3763305	6	32369488	A	G	5.80156039913305	13239	0.24096	0.0882851136838525	0.0138306315415556	6.38330313540566	1.73308353022715e-10	6	32369488	A	G	-6.60465	450243	0.0512	-0.0324458	0.00550226216097835	-5.89681	3.70606587584002e-09	6	32369488	A	G	0.3892	0.0670854	6.56976749365881e-09	5.80156039913305	6	32369488	A	G	-0.0284	0.0043	3.05984903465499e-11	-6.60465	3.5124e-11	6.04587737338168e-10
rs9271348	6	32583742	A	G	4.91211810628694	13239	0.24096	0.076477759985664	0.0138306315415556	5.52959275618602	3.20975049349026e-08	6	32583742	A	G	-6.6	450243	0.6954	-0.0154616	0.00263500415752402	-5.86779	4.41645872086173e-09	6	32583742	A	G	0.180204	0.0366856	9.01010806851586e-07	4.91211810628694	6	32583742	A	G	-0.0132	0.002	1.08800276735613e-10	-6.6	3.63187e-11	4.13728098488733e-10
rs4446605	6	31173096	G	A	5.20618969536279	13239	0.24096	0.080368213300105	0.0138306315415556	5.81088528449551	6.21433371334156e-09	6	31173096	G	A	-6.59375	450243	0.0924	-0.0245847	0.00418774634484607	-5.87062	4.34165182724081e-09	6	31173096	G	A	0.247016	0.0474466	1.92752491319094e-07	5.20618969536279	6	31173096	G	A	-0.0211	0.0032	7.72680585095702e-11	-6.59375	3.79868e-11	4.93098438412021e-10
rs9263948	6	31181025	T	C	5.26362088715343	13239	0.24096	0.0811300980380257	0.0138306315415556	5.86597204865602	4.46509017089327e-09	6	31181025	T	C	-6.59375	450243	0.0927	-0.0245557	0.00418165572866828	-5.87223	4.29960985980467e-09	6	31181025	T	C	0.249513	0.0474033	1.41250502011827e-07	5.26362088715343	6	31181025	T	C	-0.0211	0.0032	7.71969247610253e-11	-6.59375	3.79868e-11	5.06294355302585e-10
rs9263870	6	31170514	G	A	5.21944425715538	13239	0.24096	0.0804904817490934	0.0138306315415556	5.81972569417752	5.89442822574366e-09	6	31170514	G	A	-6.5625	450243	0.0924	-0.0244726	0.00418774634484607	-5.84386	5.10038121274717e-09	6	31170514	G	A	0.247719	0.0474608	1.79456833336889e-07	5.21944425715538	6	31170514	G	A	-0.021	0.0032	1.0310031685754e-10	-6.5625	4.75194e-11	6.05226321193805e-10
rs9263916	6	31176928	C	T	5.19813367460747	13239	0.24096	0.0802077746156834	0.0138306315415556	5.79928504166209	6.65982468139848e-09	6	31176928	C	T	-6.5625	450243	0.0926	-0.0244464	0.00418368248248892	-5.84327	5.11874702555376e-09	6	31176928	C	T	0.246548	0.0474301	2.01307520647996e-07	5.19813367460747	6	31176928	C	T	-0.021	0.0032	8.54869849163667e-11	-6.5625	4.75194e-11	5.99350807585808e-10
rs11066320	12	112906415	G	A	-5.17361	13239	0.24096	-0.0797302	0.0138306315415556	-5.76476	8.17762492214492e-09	12	112906415	G	A	6.47368421052632	450243	0.5745	0.0141417624573325	0.0024528376214108	5.76547030014918	8.14304419222228e-09	12	112906415	G	A	-0.167208	0.0323194	2.29625439210016e-07	-5.17361	12	112906415	G	A	0.0123	0.0019	1.28300987783097e-10	6.47368421052632	8.92755e-11	1.03762811263664e-09
rs11066301	12	112871372	G	A	5.1766616150682	13239	0.24096	0.0796804634586127	0.0138306315415556	5.76115871637561	8.35384374150761e-09	12	112871372	G	A	-6.42105	450243	0.4267	-0.0140248	0.00245194827974779	-5.71986	1.06609673131177e-08	12	112871372	G	A	0.167377	0.032333	2.25891557580056e-07	5.1766616150682	12	112871372	G	A	-0.0122	0.0019	1.4089967780169e-10	-6.42105	1.29204e-10	1.44276370393351e-09
rs28362343	6	31165527	A	G	5.06464167630218	13239	0.24096	0.0780440380359012	0.0138306315415556	5.64283979378739	1.67267978533369e-08	6	31165527	A	G	-6.33333	450243	0.0922	-0.0236442	0.00419182407595786	-5.64056	1.69494640171432e-08	6	31165527	A	G	0.236968	0.0467887	4.09194700021281e-07	5.06464167630218	6	31165527	A	G	-0.0209	0.0033	1.38200622740431e-10	-6.33333	2.37664e-10	2.35867537383473e-09
rs28362332	6	31162154	A	G	5.21037293096488	13239	0.24096	0.0799253714162636	0.0138306315415556	5.77886636457049	7.52056297438093e-09	6	31162154	A	G	-6.30303	450243	0.0921	-0.0235626	0.00419386816585564	-5.61835	1.92791581358223e-08	6	31162154	A	G	0.247797	0.0475584	1.88456013482271e-07	5.21037293096488	6	31162154	A	G	-0.0208	0.0033	1.55700497412465e-10	-6.30303	2.92795e-10	3.02709362140553e-09
rs2076311	6	33145369	A	C	-6.21271	13239	0.24096	-0.0930458	0.0138306315415556	-6.72752	1.72583176459896e-11	6	33145369	A	C	6.2	450243	0.3129	0.0145343371818009	0.00261547661657466	5.55705108953937	2.74370473004352e-08	6	33145369	A	C	-0.222269	0.0357765	5.2077484700273e-10	-6.21271	6	33145369	A	C	0.0124	0.002	1.23500865169291e-09	6.2	5.42065e-10	8.67888692644021e-09
rs4148872	6	32802807	T	C	6.19267621838316	13239	0.24096	0.0926276723141067	0.0138306315415556	6.69728436013908	2.12328209638126e-11	6	32802807	T	C	-6.11111	450243	0.1484	-0.018692	0.00341136995837685	-5.47932	4.26966102855267e-08	6	32802807	T	C	0.275584	0.0445016	5.91493532045801e-10	6.19267621838316	6	32802807	T	C	-0.0165	0.0027	4.7940217494151e-10	-6.11111	6.20673e-10	1.4512712455087e-08

## Sheet: Supplementary Table S3
Supplementary Table S3 Using a combination of MTAG and CPASSOC methods to screen for shared SNPs between PBC and LFPL.
SNP	CHR_PBC	BP_PBC	A1_PBC	A2_PBC	Z_PBC	N_PBC	FRQ_PBC	mtag_beta_PBC	mtag_se_PBC	mtag_z_PBC	mtag_pval_PBC	CHR_LFPL	BP_LFPL	A1_LFPL	A2_LFPL	Z_LFPL	N_LFPL	FRQ_LFPL	mtag_beta_LFPL	mtag_se_LFPL	mtag_z_LFPL	mtag_pval_LFPL	CHR.x	BP.x	effect_allele.x	other_allele.x	beta.x	se.x	pval.x	Z.x	CHR.y	BP.y	effect_allele.y	other_allele.y	beta.y	se.y	pval.y	Z.y	p_Shet	p_Shom
rs2272593	6	31601344	C	T	7.44141548067024	13239	0.24096	0.117843668705094	0.0141834187220877	8.30855176838128	9.68771120472572e-17	6	31601344	C	T	10.0594788115649	454826	0.721914	0.0239566653078654	0.00247849761477386	9.66580123582295	4.21310033508816e-22	6	31601344	C	T	0.291289	0.0391443	9.96322641954418e-14	7.44141548067024	6	31601344	C	T	0.0141052	0.00140218	8.30041869715702e-24	10.0594788115649	1.60698e-25	6.81375442762837e-24
rs1475865	6	31657413	C	T	7.62301431092939	13239	0.24096	0.120369231237226	0.0141834187220877	8.48661620979828	2.12740910132462e-17	6	31657413	C	T	10.0544132415051	454826	0.723004	0.0239843426404925	0.0024814966951762	9.66527285211212	4.23489894190012e-22	6	31657413	C	T	0.30016	0.0393755	2.47856321539419e-14	7.62301431092939	6	31657413	C	T	0.0141171	0.00140407	8.80035111687326e-24	10.0544132415051	1.69148e-25	7.13732993366596e-24
rs3130617	6	31627523	T	C	7.60435276093916	13239	0.24096	0.120039777326136	0.0141834187220877	8.46338810678976	2.59719591453948e-17	6	31627523	T	C	10.0049182080616	454826	0.722516	0.0238544256100758	0.00248015082519817	9.61813506167302	6.70354914637255e-22	6	31627523	T	C	0.29881	0.0392946	2.86285927087212e-14	7.60435276093916	6	31627523	T	C	0.0140364	0.00140295	1.39990962656834e-23	10.0049182080616	2.9474e-25	1.17998568338338e-23
rs3115667	6	31643399	C	T	7.60123910038886	13239	0.24096	0.119855230895897	0.0141834187220877	8.45037668592887	2.90364455832015e-17	6	31643399	C	T	9.9039710058074	454826	0.721632	0.0235949217042465	0.00247772586090904	9.5228136722074	1.68552395719354e-21	6	31643399	C	T	0.300835	0.0395771	2.93359394121412e-14	7.60123910038886	6	31643399	C	T	0.013882	0.00140166	4.00036851046125e-23	9.9039710058074	9.06115e-25	3.26209125070017e-23
rs644045	6	31883957	G	A	5.63780886242451	13239	0.24096	0.0893278112380929	0.0141834187220877	6.29804513202331	3.01422759989659e-10	6	31883957	G	A	7.65451171890163	454826	0.616443	0.0167959786084381	0.00228380689999099	7.35437773154306	1.9181859297174e-13	6	31883957	G	A	0.199305	0.0353515	1.72234441059164e-08	5.63780886242451	6	31883957	G	A	0.0098597	0.00128809	1.90020300257723e-14	7.65451171890163	3.72494e-15	1.72525911057034e-14
rs2857609	6	31577825	G	A	7.59504050906944	13239	0.24096	0.113944560485942	0.0141834187220877	8.03364567588332	9.46181912260425e-16	6	31577825	G	A	5.73780097894455	454826	0.841307	0.0169944702988127	0.00303923767092927	5.59169	2.24871998767016e-08	6	31577825	G	A	0.393635	0.0518279	3.07680519375975e-14	7.59504050906944	6	31577825	G	A	0.00987028	0.00172022	9.59997274392481e-09	5.73780097894455	7.03417e-15	8.48708560970149e-09
rs9268644	6	32408044	C	A	6.17382514032697	13239	0.24096	0.0939850357853123	0.0141834187220877	6.62640211269729	3.43967383267099e-11	6	32408044	C	A	5.63856330002936	454826	0.551789	0.0122029799792045	0.00223302212087093	5.46478239742874	4.63474994267538e-08	6	32408044	C	A	0.208871	0.0338317	6.66545805807103e-10	6.17382514032697	6	32408044	C	A	0.00710521	0.00126011	1.70000422215637e-08	5.63856330002936	3.96274e-10	1.5557077232977e-08

## Sheet: Supplementary Table S4
Supplementary Table S4 Using a combination of MTAG and CPASSOC methods to screen for shared SNPs between PBC and LFPR.
SNP	CHR_PBC	BP_PBC	A1_PBC	A2_PBC	Z_PBC	N_PBC	FRQ_PBC	mtag_beta_PBC	mtag_se_PBC	mtag_z_PBC	mtag_pval_PBC	CHR_LFPR	BP_LFPR	A1_LFPR	A2_LFPR	Z_LFPR	N_LFPR	FRQ_LFPR	mtag_beta_LFPR	mtag_se_LFPR	mtag_z_LFPR	mtag_pval_LFPR	CHR.x	BP.x	effect_allele.x	other_allele.x	beta.x	se.x	pval.x	Z.x	CHR.y	BP.y	effect_allele.y	other_allele.y	beta.y	se.y	pval.y	Z.y	p_Shet	p_Shom
rs2272593	6	31601344	C	T	7.44141548067024	13239	0.24096	0.118017807058121	0.0141666816289416	8.33065993499977	8.03929478236384e-17	6	31601344	C	T	9.99267750021123	454854	0.721913	0.0238160451902277	0.00248021123950695	9.60242612035022	7.80844172572708e-22	6	31601344	C	T	0.291289	0.0391443	9.96322641954418e-14	7.44141548067024	6	31601344	C	T	0.0141924	0.00142028	1.5999263828686e-23	9.99267750021123	9.93536e-28	1.44495720642606e-23
rs1475865	6	31657413	C	T	7.62301431092939	13239	0.24096	0.120516257198218	0.0141666816289416	8.50702093509402	1.78459319514618e-17	6	31657413	C	T	9.97321033054655	454854	0.723004	0.0238102915606645	0.00248321513840257	9.58849323703039	8.93807209910275e-22	6	31657413	C	T	0.30016	0.0393755	2.47856321539419e-14	7.62301431092939	6	31657413	C	T	0.0141838	0.00142219	1.99986186963274e-23	9.97321033054655	1.2607e-27	1.75302692309507e-23
rs3130617	6	31627523	T	C	7.60435276093916	13239	0.24096	0.120215581841231	0.0141666816289416	8.48579681466395	2.14245518714291e-17	6	31627523	T	C	9.94490028570222	454854	0.722515	0.0237299798589155	0.0024818655818419	9.56134773475701	1.16233067618496e-21	6	31627523	T	C	0.29881	0.0392946	2.86285927087212e-14	7.60435276093916	6	31627523	T	C	0.0141323	0.00142106	2.70022528688824e-23	9.94490028570222	1.79204e-27	2.3320585314841e-23
rs3115667	6	31643399	C	T	7.60123910038886	13239	0.24096	0.119994263275439	0.0141666816289416	8.47017434416671	2.45026017448228e-17	6	31643399	C	T	9.82208260551079	454854	0.721632	0.0234195104338508	0.0024794416928224	9.4454773837379	3.53787906284497e-21	6	31643399	C	T	0.300835	0.0395771	2.93359394121412e-14	7.60123910038886	6	31643399	C	T	0.013945	0.00141976	8.99911910870052e-23	9.82208260551079	8.13193e-27	7.95948257991666e-23
rs644045	6	31883957	G	A	5.63780886242451	13239	0.24096	0.0896803392489485	0.0141666816289416	6.33037020227358	2.44573683608345e-10	6	31883957	G	A	7.75493780322366	454854	0.616439	0.0170232274505227	0.00228538394053328	7.44873854611515	9.42369146895262e-14	6	31883957	G	A	0.199305	0.0353515	1.72234441059164e-08	5.63780886242451	6	31883957	G	A	0.0101181	0.00130473	8.80035111687322e-15	7.75493780322366	5.68715e-17	8.19875194551092e-15
rs2857609	6	31577825	G	A	7.59504050906944	13239	0.24096	0.114064072018847	0.0141666816289416	8.05157305051748	8.17366063315582e-16	6	31577825	G	A	5.78976366203326	454854	0.841304	0.0171639553164435	0.00304131902678896	5.64358923390069	1.66541145774903e-08	6	31577825	G	A	0.393635	0.0518279	3.07680519375975e-14	7.59504050906944	6	31577825	G	A	0.0100882	0.00174242	7.00003159130898e-09	5.78976366203326	2.86944e-16	6.5202582643233e-09
rs3117578	6	31636031	G	A	7.57810978441625	13239	0.24096	0.113548895675723	0.0141666816289416	8.01520769999868	1.0995105246891e-15	6	31636031	G	A	5.59683174528487	454854	0.850659	0.0170274033249213	0.00311784246504541	5.46127763535778	4.72720089969982e-08	6	31636031	G	A	0.404665	0.0533992	3.50590383932613e-14	7.57810978441625	6	31636031	G	A	0.00999152	0.00178521	2.19998641983516e-08	5.59683174528487	3.36653e-16	2.02462487617476e-08
rs2857700	6	31572481	C	T	7.05710991612614	13239	0.24096	0.106408125594231	0.0141666816289416	7.51115387366693	5.86084534269714e-14	6	31572481	C	T	5.67143966910916	454854	0.862849	0.0178282969604841	0.00323038702090898	5.51893529942043	3.41059728142808e-08	6	31572481	C	T	0.400925	0.0568115	1.69980851320349e-12	7.05710991612614	6	31572481	C	T	0.010805	0.00190516	1.40000633223953e-08	5.67143966910916	3.85923e-14	1.31910464116656e-08
rs9268644	6	32408044	C	A	6.17382514032697	13239	0.24096	0.0943441022147825	0.0141666816289416	6.65957665216699	2.74617451366361e-11	6	32408044	C	A	5.82703562390805	454854	0.551788	0.0126121921470645	0.00223456802685753	5.64412987005863	1.66018723681456e-08	6	32408044	C	A	0.208871	0.0338317	6.66545805807103e-10	6.17382514032697	6	32408044	C	A	0.00743757	0.00127639	5.60002544078e-09	5.82703562390805	5.52134e-11	5.29561659656011e-09

## Sheet: Supplementary Table S5
Supplementary Table S5 Using a combination of MTAG and CPASSOC methods to screen for shared SNPs between PBC and HGSL.
SNP	CHR_PBC	BP_PBC	A1_PBC	A2_PBC	Z_PBC	N_PBC	FRQ_PBC	mtag_beta_PBC	mtag_se_PBC	mtag_z_PBC	mtag_pval_PBC	CHR_HGSL	BP_HGSL	A1_HGSL	A2_HGSL	Z_HGSL	N_HGSL	FRQ_HGSL	mtag_beta_HGSL	mtag_se_HGSL	mtag_z_HGSL	mtag_pval_HGSL	CHR.x	BP.x	effect_allele.x	other_allele.x	beta.x	se.x	pval.x	Z.x	CHR.y	BP.y	effect_allele.y	other_allele.y	beta.y	se.y	pval.y	Z.y	p_Shet	p_Shom
rs9275219	6	32659077	T	C	14.5484716802985	13239	0.24096	0.212790895435013	0.0141576343132282	15.0301166654794	4.66184006950961e-51	6	32659077	T	C	5.45815693610318	335821	0.753525	0.0174093095233031	0.002914177012304	5.97400550817571	2.31497979870961e-09	6	32659077	T	C	0.511565	0.0351628	5.97035286583841e-48	14.5484716802985	6	32659077	T	C	0.0110877	0.0020314	4.81504111655667e-08	5.45815693610318	1.90509e-52	1.68011802552836e-08
rs9275408	6	32670110	C	T	14.1951588974336	13239	0.24096	0.208026415736835	0.0141576343132282	14.6935858869067	7.08623900681894e-49	6	32670110	C	T	5.54437436982266	335821	0.75115	0.0175478085553908	0.00290481875668503	6.0409306140037	1.53227866334186e-09	6	32670110	C	T	0.500412	0.0352523	9.81747943019978e-46	14.1951588974336	6	32670110	C	T	0.0112176	0.00202324	2.95290856832221e-08	5.54437436982266	5.695e-50	1.0420754023344e-08
rs9275375	6	32668632	A	G	14.1411135537811	13239	0.24096	0.207185227582791	0.0141576343132282	14.6341700173176	1.70037994133264e-48	6	32668632	A	G	5.49658727530631	335821	0.751153	0.0174059704825189	0.00290483046553875	5.99207791608268	2.07176615220509e-09	6	32668632	A	G	0.496585	0.0351164	2.11884896208663e-45	14.1411135537811	6	32668632	A	G	0.0111213	0.00202331	3.87427103786558e-08	5.49658727530631	1.34529e-49	1.38465354811441e-08
rs9275418	6	32670244	G	A	14.1407108726728	13239	0.24096	0.207262717361205	0.0141576343132282	14.6396433737203	1.56888971920826e-48	6	32670244	G	A	5.54167737598608	335821	0.751143	0.0175326088165447	0.00290479143712085	6.03575478517746	1.5822136690441e-09	6	32670244	G	A	0.496585	0.0351174	2.1315719667169e-45	14.1407108726728	6	32670244	G	A	0.0112117	0.00202316	2.99854105896159e-08	5.54167737598608	1.35392e-49	1.06310021665945e-08
rs9275390	6	32669156	C	T	14.139612377711	13239	0.24096	0.207243551815312	0.0141576343132282	14.6382896485519	1.60043737601828e-48	6	32669156	C	T	5.53958398166398	335821	0.751218	0.0175283324137106	0.0029050842264957	6.03367442976152	1.60272811721009e-09	6	32669156	C	T	0.496463	0.0351115	2.16520987930794e-45	14.139612377711	6	32669156	C	T	0.0112145	0.00202443	3.03410076521129e-08	5.53958398166398	1.37773e-49	1.0763612038945e-08
rs9275374	6	32668526	T	C	14.1394512971386	13239	0.24096	0.207264134384646	0.0141576343132282	14.6397434627188	1.56658193924579e-48	6	32668526	T	C	5.55196987368296	335821	0.751159	0.017561787236045	0.00290485388409057	6.04566974340022	1.48790604179007e-09	6	32668526	T	C	0.496463	0.0351119	2.16970155380084e-45	14.1394512971386	6	32668526	T	C	0.0112343	0.00202348	2.82657165814211e-08	5.55196987368296	1.38126e-49	1.00067898294929e-08
rs9275393	6	32669439	A	G	14.1394512971386	13239	0.24096	0.207246826912649	0.0141576343132282	14.6385209793848	1.5950019815205e-48	6	32669439	A	G	5.54257895517224	335821	0.751157	0.017535304399088	0.00290484607778154	6.03656921212154	1.57425247433639e-09	6	32669439	A	G	0.496463	0.0351119	2.16920201906873e-45	14.1394512971386	6	32669439	A	G	0.0112143	0.0020233	2.98242821982017e-08	5.54257895517224	1.38126e-49	1.05757611189801e-08
rs9275406	6	32669955	T	G	14.1393707582286	13239	0.24096	0.207237862574258	0.0141576343132282	14.6378877988553	1.60992318276954e-48	6	32669955	T	G	5.53832391853357	335821	0.751151	0.017523174098937	0.002904822659605	6.03244196026747	1.61500356321936e-09	6	32669955	T	G	0.496463	0.0351121	2.17270117886376e-45	14.1393707582286	6	32669955	T	G	0.0112063	0.00202341	3.05618753448803e-08	5.53832391853357	1.38303e-49	1.08438640060447e-08
rs9275407	6	32670037	T	G	14.1390888792691	13239	0.24096	0.207270409061657	0.0141576343132282	14.6401866636712	1.55640347299658e-48	6	32670037	T	G	5.55811470710346	335821	0.751132	0.0175783978966	0.00290474850947282	6.05160751069299	1.43407526693695e-09	6	32670037	T	G	0.496463	0.0351128	2.18072046882494e-45	14.1390888792691	6	32670037	T	G	0.0112454	0.00202324	2.72897778280804e-08	5.55811470710346	1.38923e-49	9.65097872287998e-09
rs9275439	6	32671521	C	T	14.1390601198696	13239	0.24096	0.20730435337934	0.0141576343132282	14.6425842618103	1.50247128155221e-48	6	32671521	C	T	5.57675011613082	335821	0.751169	0.017631727799022	0.00290489291751227	6.06966531975359	1.28177085127864e-09	6	32671521	C	T	0.496585	0.0351215	2.18222737756593e-45	14.1390601198696	6	32671521	C	T	0.011285	0.00202358	2.45284440601967e-08	5.57675011613082	1.38986e-49	8.64478777615311e-09
rs9275427	6	32670915	T	C	14.138973842027	13239	0.24096	0.207242200308364	0.0141576343132282	14.6381941871974	1.60268572506697e-48	6	32670915	T	C	5.54367862102366	335821	0.751144	0.0175380283798172	0.00290479533982192	6.03761240573056	1.56411204680816e-09	6	32670915	T	C	0.496524	0.0351174	2.18474120647903e-45	14.138973842027	6	32670915	T	C	0.0112178	0.00202353	2.96346634854862e-08	5.54367862102366	1.39177e-49	1.05079220054969e-08
rs9275424	6	32670576	G	A	14.1380822604392	13239	0.24096	0.207247546229751	0.0141576343132282	14.6385717871035	1.59381065663897e-48	6	32670576	G	A	5.55332051617878	335821	0.751153	0.017565260580787	0.00290483046553875	6.04691419660156	1.47646336752303e-09	6	32670576	G	A	0.496463	0.0351153	2.21207577646412e-45	14.1380822604392	6	32670576	G	A	0.0112362	0.00202333	2.80562743713545e-08	5.55332051617878	1.4116e-49	9.92847132850753e-09
rs9275425	6	32670874	A	C	14.1375588752898	13239	0.24096	0.207222017596077	0.0141576343132282	14.6367686162411	1.63663789205003e-48	6	32670874	A	C	5.54342615700131	335821	0.751148	0.0175372185309378	0.00290481095093891	6.03730116249709	1.5671308240002e-09	6	32670874	A	C	0.496463	0.0351166	2.22894832450507e-45	14.1375588752898	6	32670874	A	C	0.0112174	0.00202355	2.96804171132377e-08	5.54342615700131	1.42338e-49	1.05246683488613e-08
rs9275428	6	32670978	G	A	14.1371160411986	13239	0.24096	0.207214532117298	0.0141576343132282	14.6362398924012	1.64941146184217e-48	6	32670978	G	A	5.54271284770437	335821	0.751141	0.0175349851260673	0.00290478363181252	6.03658907122314	1.57405883583245e-09	6	32670978	G	A	0.496463	0.0351177	2.24284881586928e-45	14.1371160411986	6	32670978	G	A	0.0112164	0.00202363	2.98023149489976e-08	5.54271284770437	1.43342e-49	1.05692919161257e-08
rs9275388	6	32669084	C	T	14.1042728341827	13239	0.24096	0.206737263141352	0.0141576343132282	14.6025288241968	2.70618102259306e-48	6	32669084	C	T	5.53207685197542	335821	0.751122	0.0175001090323147	0.00290470948762124	6.02473641749492	1.69385440812698e-09	6	32669084	C	T	0.496524	0.0352038	3.57519718745026e-45	14.1042728341827	6	32669084	C	T	0.011192	0.00202311	3.16759756177501e-08	5.53207685197542	2.41257e-49	1.12791225588802e-08
rs9275464	6	32672082	G	A	14.1031511137116	13239	0.24096	0.206692776793719	0.0141576343132282	14.5993866080151	2.8338352972552e-48	6	32672082	G	A	5.51642016773712	335821	0.755856	0.0175690297752117	0.00292353729388618	6.0095110850656	1.86083640956265e-09	6	32672082	G	A	0.496524	0.0352066	3.63161666207504e-45	14.1031511137116	6	32672082	G	A	0.0112343	0.00203652	3.46194369310348e-08	5.51642016773712	2.4558e-49	1.23651047514373e-08
rs660895	6	32577380	G	A	11.2248363988587	13239	0.24096	0.168430895964022	0.0141576343132282	11.8968248676015	1.22936078848299e-32	6	32577380	G	A	6.51867066199607	335821	0.784679	0.0209149014887207	0.00305535719183892	6.84532124250019	7.63044466984353e-12	6	32577380	G	A	0.427618	0.0380957	3.0789313097416e-29	11.2248363988587	6	32577380	G	A	0.013901	0.00213249	7.10231614300866e-11	6.51867066199607	1.4597e-31	2.74578403191338e-11
rs3763317	6	32376788	T	C	10.8593245792583	13239	0.24096	0.162865332041183	0.0141576343132282	11.5037108910922	1.26363283779467e-30	6	32376788	T	C	6.26246187463013	335821	0.550951	0.0166135644774113	0.0025249212877004	6.57983461042555	4.70971858130386e-11	6	32376788	T	C	0.349983	0.0322288	1.80052849969888e-27	10.8593245792583	6	32376788	T	C	0.0110054	0.00175736	3.7943728138867e-10	6.26246187463013	1.35748e-29	1.56583967558014e-10
rs1049225	6	32627747	G	A	10.0432331437102	13239	0.24096	0.149759863981664	0.0141576343132282	10.5780288336545	3.76801893020465e-26	6	32627747	G	A	5.32197674250074	335821	0.235235	0.0166704274378656	0.00296098513207012	5.63002740449789	1.80180990778176e-08	6	32627747	G	A	0.433247	0.0431382	9.83784554914415e-24	10.0432331437102	6	32627747	G	A	0.0110158	0.00206987	1.02706989602628e-07	5.32197674250074	1.96387e-25	5.08579583110688e-08
rs3135006	6	32667119	C	T	9.9762937345735	13239	0.24096	0.1486638727448	0.0141576343132282	10.5006153892459	8.58188144406929e-26	6	32667119	C	T	5.23342702074045	335821	0.236851	0.0163682489905009	0.00295398929710754	5.5410657738429	3.00636261260223e-08	6	32667119	C	T	0.429246	0.0430266	1.93597613764143e-23	9.9762937345735	6	32667119	C	T	0.0107997	0.0020636	1.66471541097411e-07	5.23342702074045	4.1685e-25	8.3723057827235e-08
rs6937545	6	32418031	C	A	9.62200730898092	13239	0.24096	0.146607552305757	0.0141576343132282	10.3553707534863	3.95650693347531e-25	6	32418031	C	A	6.79643524663434	335821	0.34083	0.0186508607247766	0.00264961988500245	7.03907033244482	1.93526673431949e-12	6	32418031	C	A	0.354392	0.0368314	6.45505578769005e-22	9.62200730898092	6	32418031	C	A	0.0125452	0.00184585	1.07423673601543e-11	6.79643524663434	2.059e-23	4.62194874105018e-12
rs7763262	6	32424882	C	T	9.61387006516011	13239	0.24096	0.146276344170537	0.0141576343132282	10.331976440009	5.05089758238611e-25	6	32424882	C	T	6.67824949741683	335821	0.339767	0.0183602607306315	0.00265162427937043	6.92415621378711	4.38581736400036e-12	6	32424882	C	T	0.354249	0.0368477	6.98714892561127e-22	9.61387006516011	6	32424882	C	T	0.0123577	0.00185044	2.42102904673618e-11	6.67824949741683	2.24822e-23	1.05722909611079e-11
rs9275595	6	32681355	C	T	9.03714785826946	13239	0.24096	0.13621322268036	0.0141576343132282	9.62118526773144	6.5076902498036e-22	6	32681355	C	T	5.57865438965223	335821	0.776042	0.0175670916703276	0.00301248778876351	5.8314233623958	5.49565515928373e-09	6	32681355	C	T	0.334041	0.0369631	1.60805167218626e-19	9.03714785826946	6	32681355	C	T	0.0117053	0.00209823	2.42582797447973e-08	5.57865438965223	9.46117e-21	1.25577999724269e-08
rs9271588	6	32590953	C	T	8.96264115481197	13239	0.24096	0.135296242465702	0.0141576343132282	9.55641595709868	1.21905344039917e-21	6	32590953	C	T	5.64445104094716	335821	0.490887	0.014801046986778	0.00251219495821149	5.89167928165708	3.82290596000942e-09	6	32590953	C	T	0.290887	0.0324555	3.1695674630435e-19	8.96264115481197	6	32590953	C	T	0.00988778	0.00175177	1.65844090127756e-08	5.64445104094716	2.00977e-20	8.57282189636864e-09
rs9275582	6	32680070	T	C	8.9385596093856	13239	0.24096	0.134938352983543	0.0141576343132282	9.53113705285235	1.55569817454318e-21	6	32680070	T	C	5.63234277816171	335821	0.776008	0.017708893736952	0.00301232513442591	5.87881219545943	4.13220865693589e-09	6	32680070	T	C	0.32952	0.036865	3.94275689595591e-19	8.9385596093856	6	32680070	T	C	0.0118175	0.00209815	1.7792214265823e-08	5.63234277816171	2.56051e-20	9.225891072197e-09
rs9275555	6	32677088	T	C	8.92288662478435	13239	0.24096	0.134888416681781	0.0141576343132282	9.52760988859193	1.60945964264374e-21	6	32677088	T	C	5.72375085820734	335821	0.771249	0.0178403514347006	0.00299000827949862	5.96665619858825	2.42164911823081e-09	6	32677088	T	C	0.328944	0.0368652	4.54359904929339e-19	8.92288662478435	6	32677088	T	C	0.0119216	0.00208283	1.04296563750254e-08	5.72375085820734	2.99659e-20	5.36141007599009e-09
rs9275523	6	32674994	A	C	8.91288482043296	13239	0.24096	0.134759572297818	0.0141576343132282	9.51850918849526	1.75681174068947e-21	6	32674994	A	C	5.72946423856004	335821	0.771237	0.0178551695295885	0.0029899531171762	5.97172224106691	2.34761977957344e-09	6	32674994	A	C	0.328512	0.0368581	4.97164373725243e-19	8.91288482043296	6	32674994	A	C	0.0119335	0.00208283	1.00816124827087e-08	5.72946423856004	3.31247e-20	5.18476730600433e-09
rs9275522	6	32674970	T	C	8.91182095625636	13239	0.24096	0.134744747456257	0.0141576343132282	9.51746206146587	1.77459975302718e-21	6	32674970	T	C	5.72946423856004	335821	0.771237	0.0178550198416352	0.0029899531171762	5.97167217742131	2.34834045280331e-09	6	32674970	T	C	0.328512	0.0368625	5.01995703378949e-19	8.91182095625636	6	32674970	T	C	0.0119335	0.00208283	1.00816124827087e-08	5.72946423856004	3.34795e-20	5.18519120522194e-09
rs9275596	6	32681631	T	C	8.86061182653211	13239	0.24096	0.135035825168168	0.0141576343132282	9.53802183193819	1.45582674675819e-21	6	32681631	T	C	6.27459245988385	335821	0.382897	0.0167872652392474	0.00258363636010065	6.49753405645422	8.16472137206595e-11	6	32681631	T	C	0.312932	0.0353172	7.95792789897093e-19	8.86061182653211	6	32681631	T	C	0.0113124	0.00180289	3.50913438358552e-10	6.27459245988385	5.58259e-20	1.70995324463818e-10
rs1612904	6	32669018	A	C	8.81740579985428	13239	0.24096	0.134403657394608	0.0141576343132282	9.49336975521599	2.23683888243226e-21	6	32669018	A	C	6.25826252490551	335821	0.382461	0.0167447515302817	0.00258419585362652	6.4796758754887	9.19198645249397e-11	6	32669018	A	C	0.311019	0.0352733	1.1716556739113e-18	8.81740579985428	6	32669018	A	C	0.0112762	0.00180181	3.89861186334558e-10	6.25826252490551	8.57427e-20	1.90906465214391e-10
rs3117572	6	31717692	G	A	8.24061735807061	13239	0.24096	0.126070183046009	0.0141576343132282	8.90474921563804	5.35068735557445e-19	6	31717692	G	A	6.09766318502564	335821	0.192604	0.0200540476122672	0.00318474929847647	6.29689992297373	3.03657184434719e-10	6	31717692	G	A	0.393932	0.0478037	1.71316818271581e-16	8.24061735807061	6	31717692	G	A	0.0135323	0.00221926	1.0774323223747e-09	6.09766318502564	2.15809e-17	5.62594635097333e-10
rs3131283	6	32119898	C	T	8.21864551604529	13239	0.24096	0.127151620038044	0.0141576343132282	8.98113464614921	2.67988650971811e-19	6	32119898	C	T	6.85057240409721	335821	0.144225	0.0251146986344281	0.00357479487903192	7.02549362530958	2.13310751390407e-12	6	32119898	C	T	0.453029	0.0551221	2.05825889054205e-16	8.21864551604529	6	32119898	C	T	0.0170545	0.0024895	7.36885481649447e-12	6.85057240409721	2.6444e-17	3.5790701741714e-12
rs9267649	6	31824828	G	A	8.21724398773765	13239	0.24096	0.12555416287322	0.0141576343132282	8.86830102370339	7.42703314680927e-19	6	31824828	G	A	5.99439976703031	335821	0.189716	0.0198460029291372	0.00320317441680984	6.19572971892756	5.80156087720524e-10	6	31824828	G	A	0.392154	0.0477233	2.08209240522012e-16	8.21724398773765	6	31824828	G	A	0.0133798	0.00223205	2.04423114160985e-09	5.99439976703031	2.67885e-17	1.08043844179256e-09
rs3134943	6	32147761	C	T	8.21044432837599	13239	0.24096	0.127436624484107	0.0141576343132282	9.00126544199805	2.23130749656952e-19	6	32147761	C	T	7.06722295715885	335821	0.148994	0.0255177613518819	0.00352695970251527	7.23505894713902	4.65326981218055e-13	6	32147761	C	T	0.448007	0.0545655	2.20394118181011e-16	8.21044432837599	6	32147761	C	T	0.0173624	0.00245675	1.58379876507478e-12	7.06722295715885	2.8524e-17	7.53643413722764e-13
rs3130283	6	32138545	C	A	8.19746051897662	13239	0.24096	0.12710049900629	0.0141576343132282	8.97752380053594	2.76928770113101e-19	6	32138545	C	A	6.98301389476425	335821	0.148387	0.0252703240652397	0.0035329063880798	7.15284281250787	8.49989183990164e-13	6	32138545	C	A	0.436491	0.0532471	2.45470891568503e-16	8.19746051897662	6	32138545	C	A	0.0171676	0.00245848	2.89467626417603e-12	6.98301389476425	3.21515e-17	1.39051542114048e-12
rs9267577	6	31813774	C	T	8.15846323413636	13239	0.24096	0.124812001304474	0.0141576343132282	8.81587972560188	1.18748909843867e-18	6	31813774	C	T	6.03614819326207	335821	0.189722	0.0199664931028474	0.00320313562519062	6.23342107209687	4.56357336201096e-10	6	31813774	C	T	0.388608	0.0476325	3.39312610162932e-16	8.15846323413636	6	31813774	C	T	0.0134789	0.00223303	1.57979232648838e-09	6.03614819326207	4.60116e-17	8.35520363696709e-10
rs2227956	6	31778272	A	G	8.1512861404845	13239	0.24096	0.124924723596123	0.0141576343132282	8.82384166960715	1.10598567936361e-18	6	31778272	A	G	6.15157644366562	335821	0.192572	0.0202083289052628	0.00318495078006263	6.34494229291212	2.22508836156863e-10	6	31778272	A	G	0.387429	0.0475298	3.60080829173483e-16	8.1512861404845	6	31778272	A	G	0.0136557	0.00221987	7.6803321093923e-10	6.15157644366562	4.91401e-17	4.01828496454169e-10
rs3130279	6	32112626	G	A	8.13557139177471	13239	0.24096	0.126305786291685	0.0141576343132282	8.92139064318617	4.60469315087036e-19	6	32112626	G	A	7.01975078340411	335821	0.150642	0.0252285132630955	0.00351101569766147	7.18553132072267	6.69463252559459e-13	6	32112626	G	A	0.435873	0.0535762	4.10015240506613e-16	8.13557139177471	6	32112626	G	A	0.0171595	0.00244446	2.22638362955291e-12	7.01975078340411	5.67414e-17	1.07207500092271e-12
rs3135391	6	32410987	G	A	8.06270978540603	13239	0.24096	0.12441508983694	0.0141576343132282	8.78784457094596	1.52456696582372e-18	6	32410987	G	A	6.54477696491001	335821	0.147216	0.0238254322087145	0.00354449338437665	6.72181596211515	1.79473551576417e-11	6	32410987	G	A	0.448947	0.0556819	7.46276902018144e-16	8.06270978540603	6	32410987	G	A	0.0161745	0.00247136	5.96623011629692e-11	6.54477696491001	1.10141e-16	3.02772197227568e-11
rs2072633	6	31919578	G	A	4.76380487716403	13239	0.24096	0.0811266297505659	0.0141576343132282	5.73023910320705	1.00289167760296e-08	6	31919578	G	A	7.99971483973993	335821	0.47527	0.0200598038473471	0.00251485558277282	7.97652317881001	1.50512913235801e-15	6	31919578	G	A	0.15759	0.0330807	1.89980925925721e-06	4.76380487716403	6	31919578	G	A	0.0140267	0.0017534	1.25054694614453e-15	7.99971483973993	1.15661e-16	7.79906154081276e-16
rs3135388	6	32413051	G	A	8.04630681001524	13239	0.24096	0.12431948281525	0.0141576343132282	8.78109153441633	1.61895721928549e-18	6	32413051	G	A	6.61692	335821	0.146695	0.0241058567814609	0.00354969793228979	6.79096003132611	1.11389785311647e-11	6	32413051	G	A	0.447851	0.0556592	8.53296570195113e-16	8.04630681001524	6	32413051	G	A	0.0163751	0.00247473	3.67282300498084e-11	6.61692	1.27773e-16	1.8534790026127e-11
rs3135350	6	32392981	T	C	8.04176376661488	13239	0.24096	0.124197789273754	0.0141576343132282	8.7724959217028	1.7474884900625e-18	6	32392981	T	C	6.58524364274082	335821	0.1467	0.0239957813970193	0.00354964783902732	6.76004563979359	1.37948278384072e-11	6	32392981	T	C	0.447225	0.0556128	8.85523314502856e-16	8.04176376661488	6	32392981	T	C	0.0162967	0.00247473	4.54883307338145e-11	6.58524364274082	1.33131e-16	2.30298336052189e-11
rs3135352	6	32392906	A	C	8.04060689119339	13239	0.24096	0.124216611598431	0.0141576343132282	8.77382540403444	1.72696927945904e-18	6	32392906	A	C	6.60420362654726	335821	0.146737	0.0240582962418797	0.00354927723681209	6.77836489986016	1.21543556407772e-11	6	32392906	A	C	0.447069	0.0556014	8.93922770479138e-16	8.04060689119339	6	32392906	A	C	0.0163423	0.00247453	4.00221117249703e-11	6.60420362654726	1.3453e-16	2.02325802762981e-11
rs3129868	6	32404377	C	A	8.0336945403875	13239	0.24096	0.124386440833654	0.0141576343132282	8.78582099817578	1.55226614497111e-18	6	32404377	C	A	6.74861600608385	335821	0.150871	0.0242739909017834	0.00350882313118904	6.91798645705963	4.58108075006049e-12	6	32404377	C	A	0.433556	0.0539672	9.45801503371012e-16	8.0336945403875	6	32404377	C	A	0.0165059	0.00244582	1.49520245001705e-11	6.74861600608385	1.43198e-16	7.45773850715878e-12
rs3129889	6	32413545	A	G	8.03009993783084	13239	0.24096	0.124107423853446	0.0141576343132282	8.76611311661623	1.84940214701523e-18	6	32413545	A	G	6.62440199120765	335821	0.146703	0.0241283289934083	0.00354961778442804	6.79744424857736	1.06491337202388e-11	6	32413545	A	G	0.446912	0.0556546	9.73867785328634e-16	8.03009993783084	6	32413545	A	G	0.0163946	0.00247488	3.49220717263408e-11	6.62440199120765	1.47921e-16	1.7632932213563e-11
rs521977	6	31836827	G	T	7.98930010336026	13239	0.24096	0.124078399439617	0.0141576343132282	8.76406302737208	1.88336449405608e-18	6	31836827	G	T	6.91714042753464	335821	0.323265	0.0190084791079095	0.00268511280939155	7.07921061693378	1.4497790280652e-12	6	31836827	G	T	0.302999	0.0379256	1.35706296962399e-15	7.98930010336026	6	31836827	G	T	0.0129336	0.00186979	4.61530068079128e-12	6.91714042753464	2.13576e-16	2.27523176979569e-12
rs3117116	6	32367017	A	G	7.98635708211632	13239	0.24096	0.123747304317092	0.0141576343132282	8.74067669635094	2.3171825319388e-18	6	32367017	A	G	6.75974256528713	335821	0.151587	0.024256771254418	0.00350200339074835	6.92654133873767	4.31253906035214e-12	6	32367017	A	G	0.432014	0.054094	1.3896326196366e-15	7.98635708211632	6	32367017	A	G	0.0165636	0.00245033	1.38484127772199e-11	6.75974256528713	2.19295e-16	6.92891079864934e-12
rs9268199	6	32278635	A	G	7.96966837646629	13239	0.24096	0.122039547289829	0.0141576343132282	8.62005223399515	6.69235775026682e-18	6	32278635	A	G	5.95930806165179	335821	0.179824	0.0201119457189226	0.00327019645329041	6.15007263514286	7.74474706319548e-10	6	32278635	A	G	0.383459	0.0481148	1.59110924801754e-15	7.96966837646629	6	32278635	A	G	0.0135905	0.00228055	2.53577082025606e-09	5.95930806165179	2.54695e-16	1.37137461765189e-09
rs3132946	6	32190028	G	A	7.9375226842319	13239	0.24096	0.122489180210097	0.0141576343132282	8.65181127723076	5.06884181748668e-18	6	32190028	G	A	6.44632893544164	335821	0.145558	0.0235767553163578	0.0035611631006924	6.62052106284425	3.57934907641401e-11	6	32190028	G	A	0.441766	0.0556554	2.06252869784657e-15	7.9375226842319	6	32190028	G	A	0.0160014	0.00248225	1.14754572655496e-10	6.44632893544164	3.39492e-16	5.94128748271e-11
rs3130342	6	32080146	C	A	7.91800601313982	13239	0.24096	0.123411883616342	0.0141576343132282	8.71698483559733	2.85708392729101e-18	6	32080146	C	A	7.09454686511096	335821	0.14994	0.0254960225655614	0.00351777173378371	7.24777628994647	4.23669605496613e-13	6	32080146	C	A	0.426638	0.053882	2.41379286937296e-15	7.91800601313982	6	32080146	C	A	0.0173749	0.00244905	1.30046898761164e-12	7.09454686511096	4.03979e-16	6.34287162240005e-13
rs9275245	6	32660943	G	A	5.30729163440874	13239	0.24096	0.0883335534096138	0.0141576343132282	6.2392876843188	4.39567928553551e-10	6	32660943	G	A	7.80084881120796	335821	0.517273	0.0196271467459554	0.00251327781761127	7.80938207802665	5.74690381673128e-15	6	32660943	G	A	0.171382	0.0322918	1.11270489859636e-07	5.30729163440874	6	32660943	G	A	0.0136752	0.00175304	6.16879019745938e-15	7.80084881120796	6.43708e-16	3.67665528698912e-15
rs9267992	6	32220397	A	G	7.83991532322529	13239	0.24096	0.121233722168047	0.0141576343132282	8.56313417099443	1.0983998578946e-17	6	32220397	A	G	6.50313348056753	335821	0.149774	0.0234776790898556	0.00351937701565298	6.67097585323622	2.54108033435464e-11	6	32220397	A	G	0.426638	0.0544187	4.5081670454146e-15	7.83991532322529	6	32220397	A	G	0.0159596	0.00245414	7.8777101958568e-11	6.50313348056753	8.06707e-16	4.09114598163328e-11
rs3130287	6	32050544	T	C	7.83821423850246	13239	0.24096	0.122029764237686	0.0141576343132282	8.61936122503653	6.73286444398972e-18	6	32050544	T	C	6.94792245578476	335821	0.150352	0.0249547670297613	0.00351380028755453	7.10193095439947	1.23025695199525e-12	6	32050544	T	C	0.420985	0.0537093	4.56982953285961e-15	7.83821423850246	6	32050544	T	C	0.0170024	0.00244712	3.71449689797623e-12	6.94792245578476	8.18891e-16	1.85038850600816e-12
rs3134603	6	32126002	G	A	7.83545337760422	13239	0.24096	0.119857829694845	0.0141576343132282	8.46595038712475	2.54072309555044e-17	6	32126002	G	A	5.79032012865956	335821	0.142975	0.0214548343688687	0.00358776840096524	5.9799942390642	2.23145511943731e-09	6	32126002	G	A	0.428785	0.0547237	4.67196951171879e-15	7.83545337760422	6	32126002	G	A	0.0144736	0.00249962	7.03120888076592e-09	5.79032012865956	8.39051e-16	3.90496774316529e-09
rs9275224	6	32659878	G	A	5.29618515869108	13239	0.24096	0.0881184834475802	0.0141576343132282	6.22409658972804	4.8433864033562e-10	6	32659878	G	A	7.76812917213442	335821	0.516928	0.0195456806718034	0.00251321843878481	7.77715154805806	7.41757285778885e-15	6	32659878	G	A	0.171026	0.0322923	1.1824968703831e-07	5.29618515869108	6	32659878	G	A	0.0136152	0.0017527	7.98730006111314e-15	7.76812917213442	8.60108e-16	4.77736067453332e-15
rs3134954	6	32071893	T	C	7.81094870766447	13239	0.24096	0.121771978490589	0.0141576343132282	8.6011529748873	7.89192090124213e-18	6	32071893	T	C	7.01420387214881	335821	0.150287	0.0251804371079839	0.00351442564672483	7.16487973830096	7.78548694306738e-13	6	32071893	T	C	0.418702	0.0536045	5.67544605408547e-15	7.81094870766447	6	32071893	T	C	0.0171653	0.00244722	2.31686111155916e-12	7.01420387214881	1.04082e-15	1.15019896934286e-12
rs1964995	6	32449411	C	T	7.80681755502032	13239	0.24096	0.118847757451814	0.0141576343132282	8.39460568216319	4.67460390482704e-17	6	32449411	C	T	5.45877667919921	335821	0.521874	0.014223636336825	0.00251418474986709	5.65735526698145	1.53723351921656e-08	6	32449411	C	T	0.254763	0.0326334	5.86408153276476e-15	7.80681755502032	6	32449411	C	T	0.00956798	0.00175277	4.79799730840443e-08	5.45877667919921	1.07925e-15	2.75396083631773e-08
rs6457617	6	32663851	T	C	5.31451575443214	13239	0.24096	0.0883111177060726	0.0141576343132282	6.23770297722404	4.44042748197962e-10	6	32663851	T	C	7.73405389381994	335821	0.521959	0.0194724875543371	0.00251420352072643	7.74499255681213	9.55874456943999e-15	6	32663851	T	C	0.171619	0.0322925	1.06944880615478e-07	5.31451575443214	6	32663851	T	C	0.013567	0.00175419	1.04447969119336e-14	7.73405389381994	1.15776e-15	6.24924991673522e-15
rs9378264	6	32443451	A	G	7.78435703192249	13239	0.24096	0.118391337028412	0.0141576343132282	8.36236721538943	6.14721551938631e-17	6	32443451	A	G	5.38094966328045	335821	0.52175	0.0140312059519005	0.00251415749781067	5.5808778742457	2.39307636054503e-08	6	32443451	A	G	0.254118	0.0326447	7.00648182865411e-15	7.78435703192249	6	32443451	A	G	0.0094285	0.0017522	7.41446808271686e-08	5.38094966328045	1.31402e-15	4.29388098596223e-08
rs3135365	6	32389255	A	C	5.76281405609386	13239	0.24096	0.0944716046014792	0.0141576343132282	6.67283830838954	2.50902785612714e-11	6	32389255	A	C	7.68711665281774	335821	0.229246	0.0230671338522539	0.00298773738643383	7.72060287393162	1.15780761488334e-14	6	32389255	A	C	0.243729	0.0422934	8.27256141461797e-09	5.76281405609386	6	32389255	A	C	0.0160045	0.00208199	1.50868995924996e-14	7.68711665281774	1.65953e-15	8.65288569936653e-15
rs3132940	6	32161396	G	T	7.75400862901668	13239	0.24096	0.12033915003776	0.0141576343132282	8.49994761662416	1.8967627049197e-17	6	32161396	G	T	6.66728375436154	335821	0.144954	0.0243505136016147	0.00356731415088125	6.82600762694233	8.73102899935066e-12	6	32161396	G	T	0.421442	0.0543515	8.90430443593742e-15	7.75400862901668	6	32161396	G	T	0.0165668	0.00248479	2.60975657249415e-11	6.66728375436154	1.71281e-15	1.34493123088781e-11
rs6920338	6	32288089	T	C	7.66819340336885	13239	0.24096	0.118453683826877	0.0141576343132282	8.36677097360821	5.9218640647997e-17	6	32288089	T	C	6.29308993722624	335821	0.15417	0.02246457945156	0.00347784097548172	6.45934636170317	1.05156184394026e-10	6	32288089	T	C	0.407668	0.0531635	1.74461659813301e-14	7.66819340336885	6	32288089	T	C	0.0152581	0.00242458	3.11522916434557e-10	6.29308993722624	3.60389e-15	1.67427035202507e-10
rs3135377	6	32385399	G	A	5.66460438660033	13239	0.24096	0.0928207785950378	0.0141576343132282	6.55623507017064	5.51832210949625e-11	6	32385399	G	A	7.53395123038387	335821	0.234958	0.0224165544099296	0.00296219361233078	7.56755207242897	3.80322742210238e-14	6	32385399	G	A	0.238511	0.0421055	1.47363524494056e-08	5.66460438660033	6	32385399	G	A	0.01555	0.00206399	4.93514594040884e-14	7.53395123038387	6.29193e-15	2.88727733355613e-14
rs1044506	6	32172065	G	T	7.60039455118875	13239	0.24096	0.118246138110001	0.0141576343132282	8.35211134105346	6.70534076628183e-17	6	32172065	G	T	6.69310304548695	335821	0.145324	0.0243881615804473	0.00356354110373487	6.84379971228244	7.71197268228484e-12	6	32172065	G	T	0.409925	0.0539347	2.95256862172897e-14	7.60039455118875	6	32172065	G	T	0.0166169	0.00248269	2.18826543268068e-11	6.69310304548695	6.44876e-15	1.14044411250251e-11
rs2857609	6	31577825	G	A	7.59504050906944	13239	0.24096	0.118260822139926	0.0141576343132282	8.35314852209658	6.64669875116636e-17	6	31577825	G	A	6.74155232782162	335821	0.15976	0.0236192532775366	0.00342780017293601	6.8905	5.55970616361472e-12	6	31577825	G	A	0.393635	0.0518279	3.07680519375975e-14	7.59504050906944	6	31577825	G	A	0.0160964	0.00238764	1.5696397920293e-11	6.74155232782162	6.75052e-15	8.14792307279017e-12
rs9271366	6	32586854	A	G	7.58093781229239	13239	0.24096	0.117529691731714	0.0141576343132282	8.30150639093005	1.0279952131165e-16	6	32586854	A	G	6.45148	335821	0.149871	0.0232524067345012	0.00351843863027521	6.60872880783554	3.87634066410589e-11	6	32586854	A	G	0.407367	0.0537357	3.4308363277495e-14	7.58093781229239	6	32586854	A	G	0.0158236	0.00245271	1.10920035525039e-10	6.45148	7.6135e-15	5.91824968741373e-11
rs3117578	6	31636031	G	A	7.57810978441625	13239	0.24096	0.118481478947416	0.0141576343132282	8.36873423384819	5.82404387717329e-17	6	31636031	G	A	6.98929217076902	335821	0.150594	0.0250360559601558	0.00351147597869067	7.12978135464595	1.00528488189472e-12	6	31636031	G	A	0.404665	0.0533992	3.50590383932613e-14	7.57810978441625	6	31636031	G	A	0.0170884	0.00244494	2.76757883062595e-12	6.98929217076902	7.79919e-15	1.40720381493905e-12
rs3130050	6	31618761	A	G	7.56554700694314	13239	0.24096	0.118453894735687	0.0141576343132282	8.36679	5.92111574045672e-17	6	31618761	A	G	7.06931211948756	335821	0.15117	0.0252665897494868	0.00350596867793528	7.20673573283794	5.73090704583999e-13	6	31618761	A	G	0.403168	0.05329	3.86278023011496e-14	7.56554700694314	6	31618761	A	G	0.0172663	0.00244243	1.55991164440754e-12	7.06931211948756	8.67946e-15	7.88349220162646e-13
rs2395165	6	32388144	T	C	5.65171678046998	13239	0.24096	0.0925407852317471	0.0141576343132282	6.53645822348171	6.29927227999668e-11	6	32388144	T	C	7.47947168642033	335821	0.234823	0.0222628022467374	0.00296278357796531	7.51415068326605	5.72815783171739e-14	6	32388144	T	C	0.23813	0.0421341	1.58847359500096e-08	5.65171678046998	6	32388144	T	C	0.0154484	0.00206544	7.47997247949335e-14	7.47947168642033	1.0019e-14	4.39779136907294e-14
rs2857600	6	31582287	C	T	7.52242372269528	13239	0.24096	0.117393797752419	0.0141576343132282	8.29190775486637	1.11446347389211e-16	6	31582287	C	T	6.82016504417788	335821	0.147131	0.0246871394909257	0.00354534040871258	6.96326350785886	3.32479082653076e-12	6	31582287	C	T	0.410528	0.0545739	5.37774245963443e-14	7.52242372269528	6	31582287	C	T	0.0168351	0.00246843	9.10751719787157e-12	6.82016504417788	1.25121e-14	4.72599548224433e-12
rs644045	6	31883957	G	A	5.63780886242451	13239	0.24096	0.0922745630405205	0.0141576343132282	6.51765407970058	7.1415449318117e-11	6	31883957	G	A	7.44017885018509	335821	0.388714	0.0192596941752166	0.00257640351219145	7.47541838228386	7.69586111599766e-14	6	31883957	G	A	0.199305	0.0353515	1.72234441059164e-08	5.63780886242451	6	31883957	G	A	0.0133453	0.00179368	1.00785951441503e-13	7.44017885018509	1.39913e-14	5.94898482895576e-14
rs3131294	6	32180146	G	A	7.37570565235518	13239	0.24096	0.115177604520731	0.0141576343132282	8.13537078105734	4.10679470674181e-16	6	32180146	G	A	6.7270063827561	335821	0.145303	0.0244690300248095	0.00356375482411717	6.86608120716359	6.59895184958073e-12	6	32180146	G	A	0.392746	0.0532486	1.63455673719756e-13	7.37570565235518	6	32180146	G	A	0.0167154	0.00248482	1.73460262787929e-11	6.7270063827561	4.27536e-14	9.19481665434236e-12
rs9267659	6	31846234	G	A	7.32811947882328	13239	0.24096	0.112580982389633	0.0141576343132282	7.95196287026872	1.83579280608048e-15	6	31846234	G	A	5.67789487600808	335821	0.218475	0.017771524817893	0.00303933720909938	5.84717114135521	5.00003015962075e-09	6	31846234	G	A	0.327671	0.0447142	2.33399542271947e-13	7.32811947882328	6	31846234	G	A	0.0120251	0.00211788	1.36480309913053e-08	5.67789487600808	6.33584e-14	7.96026315116901e-09
rs535586	6	31860337	C	T	6.01011087910493	13239	0.24096	0.097105440488937	0.0141576343132282	6.85887474846039	6.94050563698021e-12	6	31860337	C	T	7.24641110151259	335821	0.366121	0.019044324047961	0.00260696797714945	7.30516224782504	2.76932372189416e-13	6	31860337	C	T	0.215299	0.0358228	1.85383040149281e-09	6.01011087910493	6	31860337	C	T	0.0131697	0.00181741	4.28844653496821e-13	7.24641110151259	6.75839e-14	2.47454744923851e-13
rs3129907	6	32323745	A	G	4.9318744230807	13239	0.24096	0.0820790341730702	0.0141576343132282	5.79751054145958	6.73065513876104e-09	6	32323745	A	G	7.24571198681215	335821	0.245788	0.0211585748491324	0.00291691747070205	7.25374477051621	4.05403730544366e-13	6	32323745	A	G	0.200893	0.0407336	8.14441696715644e-07	4.9318744230807	6	32323745	A	G	0.0147685	0.00203824	4.31022558004995e-13	7.24571198681215	7.61422e-14	2.75665067015231e-13
rs659445	6	31864304	A	G	6.01568826758857	13239	0.24096	0.0971554814530482	0.0141576343132282	6.86240930536475	6.77087265404071e-12	6	31864304	A	G	7.23139244965242	335821	0.366469	0.0190032562246404	0.00260644545945695	7.29087046716862	3.07958749040448e-13	6	31864304	A	G	0.215423	0.0358102	1.79105944393464e-09	6.01568826758857	6	31864304	A	G	0.0131385	0.00181687	4.79181452908224e-13	7.23139244965242	7.64181e-14	2.76569112619067e-13
rs589428	6	31848220	G	T	6.01795780251443	13239	0.24096	0.0971836200540274	0.0141576343132282	6.86439682675121	6.67727785122704e-12	6	31848220	G	T	7.22950034938679	335821	0.366097	0.0190028272613388	0.00260700407458416	7.28914367514748	3.11931266669118e-13	6	31848220	G	T	0.215547	0.0358173	1.76624115500878e-09	6.01795780251443	6	31848220	G	T	0.0131394	0.00181747	4.85735673287855e-13	7.22950034938679	7.75958e-14	2.80425910127315e-13
rs3129931	6	32335516	T	C	4.78257606272658	13239	0.24096	0.079957857402279	0.0141576343132282	5.64768489094046	1.62622899754279e-08	6	32335516	T	C	7.22361815246849	335821	0.246779	0.0210471006236744	0.00291296917278282	7.22530839678186	4.99965926713844e-13	6	32335516	T	C	0.191161	0.0399703	1.73077255524446e-06	4.78257606272658	6	32335516	T	C	0.0146331	0.00202573	5.07224239892651e-13	7.22361815246849	9.27022e-14	3.2943580946092e-13
rs605203	6	31847012	A	C	5.98237263939194	13239	0.24096	0.0966386453209206	0.0141576343132282	6.82590347955424	8.73736626244427e-12	6	31847012	A	C	7.20285954861398	335821	0.366374	0.0189281347164446	0.00260658793466632	7.26165208727848	3.82390722031892e-13	6	31847012	A	C	0.214556	0.0358647	2.19917606416774e-09	5.98237263939194	6	31847012	A	C	0.0130881	0.00181707	5.90744925867226e-13	7.20285954861398	9.68849e-14	3.42867786001747e-13
rs760293	6	31611777	C	T	5.28155914155191	13239	0.24096	0.0868303052739138	0.0141576343132282	6.13310835361695	8.61784085147659e-10	6	31611777	C	T	7.1797593927994	335821	0.181427	0.0234845960292494	0.00325890372771208	7.20628714176125	5.74980905435063e-13	6	31611777	C	T	0.241053	0.0456405	1.28085509453628e-07	5.28155914155191	6	31611777	C	T	0.0162987	0.00227009	6.99841996002275e-13	7.1797593927994	1.25871e-13	4.3458103584171e-13
rs9267576	6	31812038	G	T	7.23546306514102	13239	0.24096	0.113649113306776	0.0141576343132282	8.02740844920597	9.95532078935194e-16	6	31812038	G	T	6.95802921186297	335821	0.147124	0.0251134194133022	0.00354541019982214	7.08336073906542	1.40699780179314e-12	6	31812038	G	T	0.392746	0.0542807	4.63980789982125e-13	7.23546306514102	6	31812038	G	T	0.0171784	0.00246886	3.45700493886872e-12	6.95802921186297	1.35293e-13	1.81893142579593e-12
rs2894249	6	32325835	T	C	4.78567514892531	13239	0.24096	0.0798870459651625	0.0141576343132282	5.64268324761857	1.67420190872653e-08	6	32325835	T	C	7.16176419978269	335821	0.245865	0.0208990035501333	0.00291660956179502	7.16551293799884	7.74958372299663e-13	6	32325835	T	C	0.191282	0.0399697	1.7041977987174e-06	4.78567514892531	6	32325835	T	C	0.0145671	0.00203401	7.98178453491154e-13	7.16176419978269	1.53416e-13	5.19893986613707e-13
rs486416	6	31856070	A	G	6.01446220422978	13239	0.24096	0.0969785876411611	0.0141576343132282	6.84991471707595	7.38940275591058e-12	6	31856070	A	G	7.14468129606085	335821	0.367222	0.0187759797001113	0.00260532056149453	7.20678291094459	5.72892267965083e-13	6	31856070	A	G	0.215423	0.0358175	1.80472070130814e-09	6.01446220422978	6	31856070	A	G	0.0129811	0.00181689	9.03857570660174e-13	7.14468129606085	1.55102e-13	5.25067626907052e-13
rs9270986	6	32574060	C	A	7.21482043134989	13239	0.24096	0.111677208788356	0.0141576343132282	7.88812638591822	3.06757020266359e-15	6	32574060	C	A	6.04416563356456	335821	0.15601	0.0214473042889039	0.00346103769746347	6.19678436459163	5.76283664754259e-10	6	32574060	C	A	0.359679	0.0498528	5.40007759066593e-13	7.21482043134989	6	32574060	C	A	0.0145775	0.00241183	1.50348811716898e-09	6.04416563356456	1.59996e-13	8.57163452386854e-10
rs9271055	6	32575369	T	G	7.20559583121811	13239	0.24096	0.111483547808853	0.0141576343132282	7.87444747776034	3.42251941278726e-15	6	32575369	T	G	6.00883353428381	335821	0.155706	0.021344263319641	0.00346379094864653	6.1621107151346	7.17816328353552e-10	6	32575369	T	G	0.359106	0.0498371	5.7782988562822e-13	7.20559583121811	6	32575369	T	G	0.0145025	0.00241353	1.87076829044566e-09	6.00883353428381	1.72421e-13	1.07049664726197e-09
rs3132958	6	32297901	G	A	4.89934731546587	13239	0.24096	0.0814298550237758	0.0141576343132282	5.75165689565042	8.83730123349445e-09	6	32297901	G	A	7.13940865871525	335821	0.245911	0.0208501045343299	0.00291642570722553	7.14919789750623	8.72864181540848e-13	6	32297901	G	A	0.194192	0.0396363	9.61590136697607e-07	4.89934731546587	6	32297901	G	A	0.0145217	0.00203402	9.39290651618398e-13	7.13940865871525	1.81728e-13	6.06094261436176e-13
rs3129941	6	32337686	G	A	4.78380880880881	13239	0.24096	0.0798152171240952	0.0141576343132282	5.63760974172923	1.72426721464447e-08	6	32337686	G	A	7.13690171864553	335821	0.245833	0.0208293891902466	0.00291673750076945	7.1413314310087	9.24311803299735e-13	6	32337686	G	A	0.191161	0.03996	1.72016457666693e-06	4.78380880880881	6	32337686	G	A	0.0145176	0.00203416	9.56533093374915e-13	7.13690171864553	1.87684e-13	6.24061447069166e-13
rs3132959	6	32298942	A	G	4.8967776262006	13239	0.24096	0.0813708342298889	0.0141576343132282	5.7474880640094	9.05789915002454e-09	6	32298942	A	G	7.12681374983405	335821	0.245978	0.0208122452830468	0.00291615804075747	7.13687152485082	9.54790072466458e-13	6	32298942	A	G	0.194192	0.0396571	9.7422663757881e-07	4.8967776262006	6	32298942	A	G	0.0144943	0.00203377	1.02896357229675e-12	7.12681374983405	2.01261e-13	6.64821901854529e-13
rs3117111	6	32338400	T	C	4.77999019176108	13239	0.24096	0.0797358333314079	0.0141576343132282	5.63200260490602	1.78128992343848e-08	6	32338400	T	C	7.12270110563238	335821	0.245925	0.0207861053805557	0.00291636976499286	7.12739023359288	1.02289786373554e-12	6	32338400	T	C	0.191039	0.0399664	1.7529519021615e-06	4.77999019176108	6	32338400	T	C	0.0144885	0.00203413	1.0602297833346e-12	7.12270110563238	2.10584e-13	6.92662168056891e-13
rs9267658	6	31845985	C	T	7.17976830362655	13239	0.24096	0.1126102596443	0.0141576343132282	7.95403	1.80539186245754e-15	6	31845985	C	T	6.81546135673851	335821	0.147371	0.0245972217546614	0.00354295089667789	6.94258048502037	3.8500146676827e-12	6	31845985	C	T	0.389641	0.0542693	6.9823240407717e-13	7.17976830362655	6	31845985	C	T	0.0168194	0.00246783	9.4102248352675e-12	6.81546135673851	2.12476e-13	5.03861674287628e-12
rs3130683	6	31888367	T	C	7.14480227216578	13239	0.24096	0.111740341435147	0.0141576343132282	7.89258565117356	2.95989053730021e-15	6	31888367	T	C	6.6078271553874	335821	0.1485	0.0238033227770515	0.00353179628620391	6.73972133388136	1.58690687813854e-11	6	31888367	T	C	0.384634	0.0538341	9.01363567078142e-13	7.14480227216578	6	31888367	T	C	0.0162951	0.00246603	3.90571005693756e-11	6.6078271553874	2.81586e-13	2.13484775942889e-11
rs2857700	6	31572481	C	T	7.05710991612614	13239	0.24096	0.110714391735492	0.0141576343132282	7.82011946953924	5.27732275170038e-15	6	31572481	C	T	6.71419419926273	335821	0.142385	0.0245778963738864	0.00359395714785768	6.83867262817451	7.9930306275421e-12	6	31572481	C	T	0.400925	0.0568115	1.69980851320349e-12	7.05710991612614	6	31572481	C	T	0.0175033	0.00260691	1.89408733441534e-11	6.71419419926273	5.67181e-13	1.03399079237988e-11
rs9268103	6	32245370	G	A	7.02443344318462	13239	0.24096	0.108792581594248	0.0141576343132282	7.68437573589521	1.53744823520658e-14	6	32245370	G	A	5.91849915820929	335821	0.171557	0.0202079031036657	0.00333131469524398	6.06604447562877	1.31098840558798e-09	6	32245370	G	A	0.338695	0.0482167	2.14931465541918e-12	7.02443344318462	6	32245370	G	A	0.0137453	0.00232243	3.25177134736137e-09	5.91849915820929	7.34658e-13	1.90258392838034e-09
rs9268148	6	32259527	A	G	7.02156462754269	13239	0.24096	0.108688143810385	0.0141576343132282	7.67699895376108	1.62858760862424e-14	6	32259527	A	G	5.88352298412616	335821	0.171523	0.0200961188074435	0.00333157648773272	6.03201483785228	1.61927906043715e-09	6	32259527	A	G	0.338695	0.0482364	2.19381499189791e-12	7.02156462754269	6	32259527	A	G	0.0136656	0.00232269	4.0198514091024e-09	5.88352298412616	7.51494e-13	2.35927043990641e-09
rs910049	6	32315727	C	T	4.83135813486812	13239	0.24096	0.0801376639538935	0.0141576343132282	5.66038521555942	1.51033582131976e-08	6	32315727	C	T	6.9523395252736	335821	0.249913	0.0202024590575394	0.00290068757897795	6.96471388506366	3.29071840487394e-12	6	32315727	C	T	0.191645	0.0396669	1.35609464184308e-06	4.83135813486812	6	32315727	C	T	0.014065	0.00202306	3.59997927043357e-12	6.9523395252736	8.15254e-13	2.36208629195193e-12
rs2523578	6	31328542	A	G	5.84883384485021	13239	0.24096	0.0942624657691309	0.0141576343132282	6.65806614888031	2.77453907331226e-11	6	31328542	A	G	6.92324508895575	335821	0.295157	0.019231251617675	0.00275345801866892	6.9843997937444	2.86076343156301e-12	6	31328542	A	G	0.226399	0.0387084	4.95039667135599e-09	5.84883384485021	6	31328542	A	G	0.0133008	0.00192118	4.42282748716886e-12	6.92324508895575	9.25161e-13	2.64907561657791e-12
rs6904320	6	32312082	G	A	4.83800778571141	13239	0.24096	0.0801803341632798	0.0141576343132282	5.66339915195884	1.48403404193469e-08	6	32312082	G	A	6.9252141928403	335821	0.250072	0.0201228509382436	0.00290007266761934	6.93874024707195	3.9561176253705e-12	6	32312082	G	A	0.191887	0.0396624	1.31144475340681e-06	4.83800778571141	6	32312082	G	A	0.0140077	0.00202271	4.36214401908048e-12	6.9252141928403	1.00849e-12	2.86452894438153e-12
rs2856725	6	32666738	T	C	6.97208975290591	13239	0.24096	0.107934966684374	0.0141576343132282	7.62379959083451	2.46315684488059e-14	6	32666738	T	C	5.84893284222211	335821	0.406589	0.0153309562416251	0.00255679312471817	5.99616609314646	2.02030389493804e-09	6	32666738	T	C	0.236989	0.0339911	3.12248240622327e-12	6.97208975290591	6	32666738	T	C	0.0104328	0.00178371	4.9524488643324e-09	5.84893284222211	1.10916e-12	2.92583864618043e-09
rs3117119	6	32318610	A	G	6.96514192362671	13239	0.24096	0.108337746810485	0.0141576343132282	7.65224926803341	1.97493930792523e-14	6	32318610	A	G	6.12001106877541	335821	0.1669	0.021078861568134	0.00336801845815225	6.25853504962624	3.88610565196428e-10	6	32318610	A	G	0.341083	0.04897	3.28095293113119e-12	6.96514192362671	6	32318610	A	G	0.0143756	0.00234895	9.36655742367896e-10	6.12001106877541	1.17123e-12	5.41498554437919e-10
rs2858324	6	32660375	G	A	6.96040947394136	13239	0.24096	0.107836754720496	0.0141576343132282	7.61686255872133	2.59915829732196e-14	6	32660375	G	A	5.88395808819409	335821	0.406786	0.0154151596216251	0.00255659834631814	6.02955862966318	1.64408065221396e-09	6	32660375	G	A	0.236482	0.0339753	3.39312610162932e-12	6.96040947394136	6	32660375	G	A	0.0105011	0.0017847	4.01032897413894e-09	5.88395808819409	1.21545e-12	2.36430707435762e-09
rs2647003	6	32664880	G	T	6.95544314078626	13239	0.24096	0.107715786702684	0.0141576343132282	7.60831819211774	2.77685519236479e-14	6	32664880	G	T	5.85587201578502	335821	0.406076	0.0153492039608497	0.0025573024795487	6.00210733129951	1.94772872480796e-09	6	32664880	G	T	0.236355	0.0339813	3.513985782354e-12	6.95544314078626	6	32664880	G	T	0.0104467	0.00178397	4.74963241637296e-09	5.85587201578502	1.26361e-12	2.80829197207851e-09
rs2647012	6	32664458	C	T	6.95515659438479	13239	0.24096	0.107735706849069	0.0141576343132282	7.60972521718588	2.74679275133136e-14	6	32664458	C	T	5.86884712664951	335821	0.406475	0.0153789403162914	0.00255690604733772	6.01466773967083	1.80256031839104e-09	6	32664458	C	T	0.236355	0.0339827	3.52127545919222e-12	6.95515659438479	6	32664458	C	T	0.0104648	0.00178311	4.39227981975988e-09	5.86884712664951	1.26645e-12	2.59444398603848e-09
rs3132963	6	32320153	A	G	6.94397505019518	13239	0.24096	0.107990200335747	0.0141576343132282	7.6277009242177	2.38977173248683e-14	6	32320153	A	G	6.09147706476682	335821	0.166672	0.0209938494353154	0.00336986022732695	6.22988730068733	4.66770834820669e-10	6	32320153	A	G	0.340661	0.0490585	3.812413511043e-12	6.94397505019518	6	32320153	A	G	0.0143129	0.00234966	1.12015984445011e-09	6.09147706476682	1.38211e-12	6.50060407457999e-10
rs2857709	6	31532814	G	A	6.21392708588207	13239	0.24096	0.0992463865121641	0.0141576343132282	7.01009676591472	2.38153354810314e-12	6	31532814	G	A	6.8670230441971	335821	0.152303	0.0242817511808746	0.00349523713962403	6.94709692386895	3.72879535479918e-12	6	31532814	G	A	0.317454	0.0510875	5.1673752410347e-10	6.21392708588207	6	31532814	G	A	0.0167383	0.00243749	6.56749876817206e-12	6.8670230441971	1.3855e-12	3.82066975355237e-12
rs9271348	6	32583742	A	G	4.91211810628694	13239	0.24096	0.0811296228416605	0.0141576343132282	5.73045051501698	1.00164246142979e-08	6	32583742	A	G	6.87994494236811	335821	0.30469	0.0188225565131698	0.00272855592993812	6.89835832450633	5.26069179567075e-12	6	32583742	A	G	0.180204	0.0366856	9.01010806851586e-07	4.91211810628694	6	32583742	A	G	0.0130957	0.00190346	5.99929199155996e-12	6.87994494236811	1.42663e-12	3.92339728005105e-12
rs2261033	6	31603591	G	A	6.37041629153803	13239	0.24096	0.101365277588457	0.0141576343132282	7.15976097035837	8.0817853605873e-13	6	31603591	G	A	6.83350681087931	335821	0.570914	0.0175640269624809	0.002537427717995	6.92198120085149	4.45370361073662e-12	6	31603591	G	A	0.204491	0.0321001	1.88521115125378e-10	6.37041629153803	6	31603591	G	A	0.01208	0.00176776	8.30041869715702e-12	6.83350681087931	1.77089e-12	4.7732240432259e-12
rs2647046	6	32668336	C	A	6.89948262033264	13239	0.24096	0.10709840724834	0.0141576343132282	7.56471066273214	3.88728880122789e-14	6	32668336	C	A	5.9440026451913	335821	0.404454	0.0155708007650747	0.00255893335389903	6.08487936637723	1.16579052584777e-09	6	32668336	C	A	0.234837	0.0340369	5.22035455103311e-12	6.89948262033264	6	32668336	C	A	0.0106063	0.00178437	2.78432546885754e-09	5.9440026451913	1.95416e-12	1.64156498869227e-09
rs2523485	6	31351035	C	T	6.1231884057971	13239	0.24096	0.0978918422915346	0.0141576343132282	6.91442087892251	4.69778514451383e-12	6	31351035	C	T	6.81813010630812	335821	0.163036	0.0234432816894799	0.00339982101154831	6.89544585136956	5.36961244310978e-12	6	31351035	C	T	0.307749	0.0502596	9.17212574401365e-10	6.1231884057971	6	31351035	C	T	0.0161814	0.00237329	9.23846887537946e-12	6.81813010630812	2.04496e-12	5.43874640076506e-12
rs3129934	6	32336187	C	T	6.87756584997373	13239	0.24096	0.107079405143932	0.0141576343132282	7.56336848197037	3.92762916572058e-14	6	32336187	C	T	6.09940457696875	335821	0.166669	0.0210093580678623	0.00336988448968248	6.23444457285891	4.53383818122727e-10	6	32336187	C	T	0.335053	0.0487168	6.08835545761395e-12	6.87756584997373	6	32336187	C	T	0.0143311	0.00234959	1.06576143237119e-09	6.09940457696875	2.31581e-12	6.21568967599491e-10
rs2856717	6	32670308	G	A	6.87306183036698	13239	0.24096	0.106762811001545	0.0141576343132282	7.54100640258743	4.66358216603217e-14	6	32670308	G	A	5.96167753292111	335821	0.404543	0.0156108986317417	0.00255884306138591	6.10076439126619	1.05562413682867e-09	6	32670308	G	A	0.233825	0.0340205	6.28347656984477e-12	6.87306183036698	6	32670308	G	A	0.0106345	0.00178381	2.49890646139567e-09	5.96167753292111	2.39788e-12	1.47443902077094e-09
rs2858305	6	32670464	T	G	6.87263759971313	13239	0.24096	0.106744144572399	0.0141576343132282	7.53968793166685	4.71097442802726e-14	6	32670464	T	G	5.95475685447087	335821	0.404089	0.0155964990646102	0.00255930463526874	6.09403775138028	1.10097678294283e-09	6	32670464	T	G	0.233825	0.0340226	6.30231345990852e-12	6.87263759971313	6	32670464	T	G	0.0106399	0.00178679	2.60663366544294e-09	5.95475685447087	2.40576e-12	1.53911726739232e-09
rs410851	6	31936668	C	T	4.82713028430829	13239	0.24096	0.0797639073096978	0.0141576343132282	5.63398556178065	1.76091770041682e-08	6	31936668	C	T	6.78150838048582	335821	0.323865	0.0182471636345874	0.00268381441655968	6.79896624818717	1.05372498085476e-11	6	31936668	C	T	0.178529	0.0369845	1.38522397637719e-06	4.82713028430829	6	31936668	C	T	0.0126802	0.00186982	1.19124200802738e-11	6.78150838048582	3.08401e-12	7.89553773920216e-12
rs419788	6	31928799	C	T	4.85043627272875	13239	0.24096	0.0800289825009348	0.0141576343132282	5.65270868920239	1.5793885870737e-08	6	31928799	C	T	6.74912020397341	335821	0.325944	0.0181357474914819	0.00267936397379497	6.76867632350636	1.29965931485682e-11	6	31928799	C	T	0.178887	0.0368806	1.23182779698901e-06	4.85043627272875	6	31928799	C	T	0.0126	0.00186691	1.48970405525771e-11	6.74912020397341	3.94494e-12	9.87212602588125e-12
rs437179	6	31929014	C	A	4.86682303176562	13239	0.24096	0.0802357529760203	0.0141576343132282	5.66731356389479	1.45053747267363e-08	6	31929014	C	A	6.73741246011179	335821	0.325894	0.0181081317419672	0.00267947012866676	6.75810174117423	1.39811344519268e-11	6	31929014	C	A	0.179486	0.0368795	1.13412258735055e-06	4.86682303176562	6	31929014	C	A	0.0125836	0.00186772	1.61473031942036e-11	6.73741246011179	4.30755e-12	1.06922714106307e-11
rs389883	6	31947460	T	G	4.80625883040746	13239	0.24096	0.0793807724806074	0.0141576343132282	5.60692349614074	2.05954640609749e-08	6	31947460	T	G	6.73143071120978	335821	0.324328	0.0181075509564774	0.00268281678928798	6.74945491200805	1.48401616510902e-11	6	31947460	T	G	0.177573	0.0369462	1.53787132784224e-06	4.80625883040746	6	31947460	T	G	0.0125834	0.00186935	1.68267406107047e-11	6.73143071120978	4.53571e-12	1.12050297963248e-11
rs17425622	6	32571961	C	T	4.88982375640755	13239	0.24096	0.0805406201952722	0.0141576343132282	5.68884733235546	1.27899747806275e-08	6	32571961	C	T	6.72892326627049	335821	0.807072	0.0214863574486004	0.00318271262746114	6.75095742644543	1.46872695749096e-11	6	32571961	C	T	0.203757	0.0416696	1.00925288607668e-06	4.88982375640755	6	32571961	C	T	0.0149804	0.00222627	1.71198517670286e-11	6.72892326627049	4.58574e-12	1.13171638715646e-11
rs440454	6	31927342	G	A	4.84757767545786	13239	0.24096	0.0799046423465834	0.0141576343132282	5.64392613756979	1.66215405266563e-08	6	31927342	G	A	6.70326787588068	335821	0.326518	0.0180081572780782	0.00267814840004277	6.7241073264613	1.76672177508084e-11	6	31927342	G	A	0.178768	0.0368778	1.24979850260639e-06	4.84757767545786	6	31927342	G	A	0.0125209	0.00186788	2.04126787125529e-11	6.70326787588068	5.59856e-12	1.35644621587018e-11
rs2242656	6	31614102	T	C	5.44690173169205	13239	0.24096	0.0881544508102991	0.0141576343132282	6.22663708215235	4.76553269439886e-10	6	31614102	T	C	6.64807924971118	335821	0.197309	0.0211398746824298	0.00315575699829004	6.6988284249657	2.10097091978297e-11	6	31614102	T	C	0.234963	0.043137	5.12530836604988e-08	5.44690173169205	6	31614102	T	C	0.0146166	0.00219862	2.97371949506929e-11	6.64807924971118	8.02448e-12	1.88077287400084e-11
rs2905722	6	31449327	G	A	6.0678906044774	13239	0.24096	0.0967837111817722	0.0141576343132282	6.83614995559975	8.13497911001852e-12	6	31449327	G	A	6.63497136216485	335821	0.156581	0.0232075094461733	0.00345589053034175	6.71534854545242	1.87617209875417e-11	6	31449327	G	A	0.311838	0.0513915	1.29601491625784e-09	6.0678906044774	6	31449327	G	A	0.0159863	0.0024094	3.25087297385435e-11	6.63497136216485	8.34287e-12	1.94840610340591e-11
rs9262639	6	31026009	T	C	5.66657121143701	13239	0.24096	0.0911886650812498	0.0141576343132282	6.44095355648845	1.18725201965846e-10	6	31026009	T	C	6.63350622654588	335821	0.774987	0.0201350900025279	0.00300746225041444	6.69504330428526	2.15607774781336e-11	6	31026009	T	C	0.205794	0.0363172	1.4568673151346e-08	5.66657121143701	6	31026009	T	C	0.0138763	0.00209185	3.28322011609199e-11	6.63350622654588	8.76886e-12	2.03853240843287e-11
rs9262648	6	31029173	A	C	5.67344242440924	13239	0.24096	0.0912841809804955	0.0141576343132282	6.44770015674188	1.13560147011412e-10	6	31029173	A	C	6.63337938419324	335821	0.774999	0.0201360738288056	0.00300751916366229	6.69524373180907	2.15312460842142e-11	6	31029173	A	C	0.206119	0.0363305	1.39952287067858e-08	5.67344242440924	6	31029173	A	C	0.0138763	0.00209189	3.28624546658205e-11	6.63337938419324	8.77143e-12	2.03907447521549e-11
rs9262616	6	31022195	T	C	5.87070216739688	13239	0.24096	0.0940263365860553	0.0141576343132282	6.64138757265413	3.10743733416029e-11	6	31022195	T	C	6.62977694065455	335821	0.775028	0.0201544141810551	0.00300765672760675	6.70103539278975	2.06947905241459e-11	6	31022195	T	C	0.217206	0.0369983	4.33940315092653e-09	5.87070216739688	6	31022195	T	C	0.0138683	0.00209182	3.36744103637713e-11	6.62977694065455	8.84287e-12	2.05414879533708e-11
rs9262636	6	31025848	G	A	5.66404453854859	13239	0.24096	0.091147172046758	0.0141576343132282	6.4380227678006	1.21039847677746e-10	6	31025848	G	A	6.63009651651393	335821	0.774992	0.0201249536109771	0.00300748596357323	6.69162012881562	2.20713205650231e-11	6	31025848	G	A	0.205713	0.0363191	1.47852952007417e-08	5.66404453854859	6	31025848	G	A	0.0138693	0.00209187	3.35969613691215e-11	6.63009651651393	8.99926e-12	2.08710970657353e-11
rs9262656	6	31034264	G	A	5.64435982236701	13239	0.24096	0.0908627114568752	0.0141576343132282	6.41793038629184	1.38139392735352e-10	6	31034264	G	A	6.62458592454147	335821	0.775004	0.0201064876348113	0.00300754287920223	6.68535360671056	2.30367707891897e-11	6	31034264	G	A	0.205142	0.0363446	1.65783002160516e-08	5.64435982236701	6	31034264	G	A	0.0138587	0.00209201	3.48738584135219e-11	6.62458592454147	9.39835e-12	2.17098605671762e-11
rs9262638	6	31025989	T	C	5.66267548618416	13239	0.24096	0.0911115343467748	0.0141576343132282	6.43550556053315	1.23063024107048e-10	6	31025989	T	C	6.62111112173755	335821	0.774743	0.0200906881982913	0.00300630625271174	6.68284815632776	2.34342359966738e-11	6	31025989	T	C	0.205631	0.0363134	1.49028729836205e-08	5.66267548618416	6	31025989	T	C	0.0138462	0.00209122	3.57026128039015e-11	6.62111112173755	9.63031e-12	2.21958862075758e-11
rs2394423	6	31032042	A	G	5.64672475986342	13239	0.24096	0.0908880568351343	0.0141576343132282	6.41972061322513	1.36524672286971e-10	6	31032042	A	G	6.62045690302164	335821	0.774996	0.0200945346083193	0.00300750493481458	6.68146355329528	2.36567618513304e-11	6	31032042	A	G	0.205224	0.0363439	1.63527199778183e-08	5.64672475986342	6	31032042	A	G	0.0138494	0.00209191	3.58674085769951e-11	6.62045690302164	9.69271e-12	2.232642992658e-11
rs630379	6	31922254	C	A	4.74899908434007	13239	0.24096	0.0783911609629315	0.0141576343132282	5.53702399910745	3.07654408521418e-08	6	31922254	C	A	6.62741413731624	335821	0.321654	0.0178685298730263	0.00268863028360737	6.64596020582342	3.0124664745127e-11	6	31922254	C	A	0.176857	0.0372409	2.0444194309269e-06	4.74899908434007	6	31922254	C	A	0.0124154	0.00187334	3.42215755153739e-11	6.62741413731624	1.00292e-11	2.30292229714709e-11
rs3906263	6	31031904	A	G	5.88581629814483	13239	0.24096	0.0941790527507018	0.0141576343132282	6.65217441466938	2.88794171519042e-11	6	31031904	A	G	6.59836201152168	335821	0.782228	0.0202999128839778	0.00304287071080524	6.67130312566116	2.53541915934543e-11	6	31031904	A	G	0.21793	0.0370263	3.96095583490633e-09	5.88581629814483	6	31031904	A	G	0.0139622	0.00211601	4.16389721025164e-11	6.59836201152168	1.11823e-11	2.54216047057344e-11
rs7195	6	32412539	G	A	5.05625905922269	13239	0.24096	0.0826293727607513	0.0141576343132282	5.83638275524228	5.33462700651106e-09	6	32412539	G	A	6.60385179873848	335821	0.39605	0.0170445614599237	0.00256788574793281	6.6375855988316	3.18862796983189e-11	6	32412539	G	A	0.171975	0.0340123	4.27562886151586e-07	5.05625905922269	6	32412539	G	A	0.0117888	0.00178514	4.01143722208768e-11	6.60385179873848	1.16211e-11	2.63259296677223e-11
rs7192	6	32411646	G	T	5.05448385189804	13239	0.24096	0.0825548511050658	0.0141576343132282	5.83111904705229	5.50568858287741e-09	6	32411646	G	T	6.57683916083916	335821	0.397136	0.0169691614739171	0.00256668099291962	6.61132471106764	3.80895958187341e-11	6	32411646	G	T	0.171857	0.0340009	4.31598572900891e-07	5.05448385189804	6	32411646	G	T	0.0117561	0.0017875	4.81282421867602e-11	6.57683916083916	1.42256e-11	3.16336548059779e-11
rs2213585	6	32413150	A	G	5.05619959603325	13239	0.24096	0.082560819567794	0.0141576343132282	5.8315406190887	5.49179389907927e-09	6	32413150	A	G	6.5671048951049	335821	0.397147	0.0169450764561904	0.00256666886341457	6.60197218960592	4.05723637037207e-11	6	32413150	A	G	0.171975	0.0340127	4.27690890299395e-07	5.05619959603325	6	32413150	A	G	0.0117387	0.0017875	5.13806980232346e-11	6.5671048951049	1.52944e-11	3.378538087209e-11
rs9262651	6	31029455	T	C	5.09192572245299	13239	0.24096	0.0830574820532014	0.0141576343132282	5.86662151427352	4.44764346727709e-09	6	31029455	T	C	6.56646597229343	335821	0.760837	0.0194402541808504	0.002944139541016	6.60303423462792	4.0282646946179e-11	6	31029455	T	C	0.182405	0.0358224	3.5443777370305e-07	5.09192572245299	6	31029455	T	C	0.0134474	0.00204789	5.15940951190331e-11	6.56646597229343	1.53151e-11	3.38269066227951e-11
rs7194	6	32412480	A	G	5.05630365753264	13239	0.24096	0.0825586269722983	0.0141576343132282	5.83138574890013	5.49689433024289e-09	6	32412480	A	G	6.56512840014316	335821	0.397427	0.0169381383728778	0.00256636060685191	6.60006170904228	4.10986675337707e-11	6	32412480	A	G	0.171975	0.034012	4.274349203143e-07	5.05630365753264	6	32412480	A	G	0.0117395	0.00178816	5.20475151170523e-11	6.56512840014316	1.55213e-11	3.42401796471176e-11
rs2227139	6	32413459	A	G	5.05152730094531	13239	0.24096	0.0824905563526416	0.0141576343132282	5.82657769847655	5.65755330758279e-09	6	32413459	A	G	6.56430769230769	335821	0.397219	0.0169370309547409	0.00256658950656614	6.59904161199548	4.13824160430433e-11	6	32413459	A	G	0.171857	0.0340208	4.38308608097123e-07	5.05152730094531	6	32413459	A	G	0.0117337	0.0017875	5.23359365186758e-11	6.56430769230769	1.56236e-11	3.44451683832306e-11
rs8084	6	32411035	C	A	5.68375607446955	13239	0.24096	0.0912843075463874	0.0141576343132282	6.44770909650463	1.13553450839145e-10	6	32411035	C	A	6.55546671656772	335821	0.43822	0.0167569415908496	0.00253117378770689	6.6202256329584	3.58651007508208e-11	6	32411035	C	A	0.189709	0.0333774	1.31774082182454e-08	5.68375607446955	6	32411035	C	A	0.0115605	0.00176349	5.5552038481374e-11	6.55546671656772	1.57105e-11	3.46192198360861e-11
rs2213586	6	32413094	G	A	5.05603607947363	13239	0.24096	0.082521618310936	0.0141576343132282	5.82877170614811	5.58368272073096e-09	6	32413094	G	A	6.54707090147196	335821	0.397282	0.0168942470092162	0.0025665201209417	6.5825499949782	4.62447224066099e-11	6	32413094	G	A	0.171975	0.0340138	4.28055419586204e-07	5.05603607947363	6	32413094	G	A	0.0117023	0.00178741	5.87489352529777e-11	6.54707090147196	1.7754e-11	3.8686585669494e-11
rs3099849	6	31351415	A	G	5.63069649611851	13239	0.24096	0.0904108743346564	0.0141576343132282	6.38601565306579	1.70263580740845e-10	6	31351415	A	G	6.48273031397022	335821	0.182896	0.0212700635336734	0.00324870611992701	6.54724150122612	5.86095460785941e-11	6	31351415	A	G	0.259159	0.0460261	1.79469230203935e-08	5.63069649611851	6	31351415	A	G	0.0146887	0.00226582	9.02194136035735e-11	6.48273031397022	2.70651e-11	5.67468161331823e-11
rs17426593	6	32608077	C	T	4.70634049548751	13239	0.24096	0.0773425396458084	0.0141576343132282	5.46295644700637	4.68269518136683e-08	6	32608077	C	T	6.38098012730531	335821	0.800711	0.0201372516547894	0.00314392109077169	6.40513902015479	1.50232428106652e-10	6	32608077	C	T	0.196389	0.0417286	2.52208663072146e-06	4.70634049548751	6	32608077	C	T	0.0144556	0.00226542	1.7617326372394e-10	6.38098012730531	6.20479e-11	1.20639524004755e-10
rs2254556	6	31342631	C	T	5.67109659024435	13239	0.24096	0.090738460098935	0.0141576343132282	6.40915410664009	1.46329228096061e-10	6	31342631	C	T	6.35501169917908	335821	0.182094	0.0209098083867653	0.00325425576932207	6.42537337841802	1.31546225486666e-10	6	31342631	C	T	0.261754	0.0461558	1.41876347709537e-08	5.67109659024435	6	31342631	C	T	0.014422	0.00226939	2.08708434263401e-10	6.35501169917908	6.84687e-11	1.31941009354535e-10
rs2523537	6	31335707	G	A	5.66759391047411	13239	0.24096	0.0906604522477887	0.0141576343132282	6.40364415706657	1.51711473718487e-10	6	31335707	G	A	6.33916886619107	335821	0.182093	0.020859354122329	0.00325426271562072	6.40985560944493	1.45657519948876e-10	6	31335707	G	A	0.262014	0.0462302	1.44817151227851e-08	5.66759391047411	6	31335707	G	A	0.0143863	0.00226943	2.31318304295856e-10	6.33916886619107	7.67867e-11	1.4644205738855e-10
rs2596548	6	31330546	G	T	5.67249184215765	13239	0.24096	0.0907014240801651	0.0141576343132282	6.40653813154492	1.48860892307145e-10	6	31330546	G	T	6.32436672601315	335821	0.182127	0.0208119133890021	0.00325402657867283	6.39574167138191	1.59769922708975e-10	6	31330546	G	T	0.262144	0.0462132	1.40731073341812e-08	5.67249184215765	6	31330546	G	T	0.014351	0.00226916	2.54583351780485e-10	6.32436672601315	8.5383e-11	1.61280915851542e-10
rs2596540	6	31367882	G	A	6.16382662267556	13239	0.24096	0.0974415898499374	0.0141576343132282	6.88261807686987	5.87624210071093e-12	6	31367882	G	A	6.26656124279991	335821	0.151084	0.0223131532557486	0.00350678872704499	6.36284503929921	1.98050478490235e-10	6	31367882	G	A	0.326562	0.0529804	7.10149850571272e-10	6.16382662267556	6	31367882	G	A	0.0152963	0.00244094	3.69530253547673e-10	6.26656124279991	1.23483e-10	2.25609207514667e-10
rs7754768	6	32420179	T	C	5.09541462369686	13239	0.24096	0.0824929978043523	0.0141576343132282	5.82675014619321	5.65171286187964e-09	6	32420179	T	C	6.23380106959044	335821	0.402985	0.0160816460474585	0.00256043724844522	6.28082022210224	3.36791414988147e-10	6	32420179	T	C	0.171263	0.0336112	3.47984580174699e-07	5.09541462369686	6	32420179	T	C	0.0111552	0.00178947	4.55784970259788e-10	6.23380106959044	1.71778e-10	3.0465888281244e-10
rs2394427	6	31019562	A	G	6.24518308305663	13239	0.24096	0.0974755636050148	0.0141576343132282	6.88501775426835	5.77803282612406e-12	6	31019562	A	G	5.66986029282981	335821	0.879189	0.0223057669574506	0.00385351306764548	5.78842385270009	7.10499443259197e-09	6	31019562	A	G	0.271781	0.0435185	4.23291940925165e-10	6.24518308305663	6	31019562	A	G	0.0152149	0.00268347	1.43024355693235e-08	5.66986029282981	2.46537e-10	9.06238358864182e-09
rs9295947	6	31019460	A	G	6.24349408636866	13239	0.24096	0.0973827983623316	0.0141576343132282	6.87846544188121	6.05007225173069e-12	6	31019460	A	G	5.63229696945229	335821	0.880145	0.0222413195459593	0.0038667492265596	5.75194258608499	8.82237637746584e-09	6	31019460	A	G	0.271705	0.0435181	4.27897747187818e-10	6.24349408636866	6	31019460	A	G	0.0153457	0.00272459	1.77983605402868e-08	5.63229696945229	2.4948e-10	1.13085567935047e-08
rs2524074	6	31244021	A	G	4.77326008460004	13239	0.24096	0.0778676986202486	0.0141576343132282	5.50005014238099	3.79683259927066e-08	6	31244021	A	G	6.15994994147252	335821	0.335516	0.016475174230129	0.00265982042519376	6.19409268162488	5.86217266829425e-10	6	31244021	A	G	0.169603	0.0355319	1.81271696801441e-06	4.77326008460004	6	31244021	A	G	0.0114195	0.00185383	7.28366562165573e-10	6.15994994147252	2.97379e-10	5.02104059677891e-10
rs2535311	6	31052684	G	A	6.05654229198219	13239	0.24096	0.0947399065197536	0.0141576343132282	6.69178935009173	2.20458066099278e-11	6	31052684	G	A	5.61182103387589	335821	0.647395	0.015044195588217	0.00262858663182321	5.72330217542888	1.0447320264753e-08	6	31052684	G	A	0.197949	0.0326835	1.39084905573384e-09	6.05654229198219	6	31052684	G	A	0.0102675	0.00182962	2.00401053375766e-08	5.61182103387589	9.09825e-10	1.29309422687581e-08
rs2256436	6	31031381	G	A	6.05419799019863	13239	0.24096	0.094823651612155	0.0141576343132282	6.69770453977305	2.11718778314439e-11	6	31031381	G	A	5.67498578862215	335821	0.647431	0.0152051589985466	0.00262864774261599	5.78440342235231	7.2770115372117e-09	6	31031381	G	A	0.198031	0.0327097	1.41123714841185e-09	6.05419799019863	6	31031381	G	A	0.0103825	0.00182952	1.38825740919232e-08	5.67498578862215	9.24478e-10	8.91996565013461e-09
rs2517502	6	31032937	T	C	6.04625914417831	13239	0.24096	0.094737389036191	0.0141576343132282	6.69161153199678	2.20726175022509e-11	6	31032937	T	C	5.6882057785017	335821	0.647459	0.0152381287008219	0.00262869528649816	5.79684103330269	6.75756895065201e-09	6	31032937	T	C	0.197703	0.0326984	1.48258635919887e-09	6.04625914417831	6	31032937	T	C	0.0104068	0.00182954	1.28463573880693e-08	5.6882057785017	9.75828e-10	8.25359659718371e-09
rs2517500	6	31033509	T	C	6.04594481362442	13239	0.24096	0.0946997961855982	0.0141576343132282	6.6889562260494	2.24767946677982e-11	6	31033509	T	C	5.67018479752073	335821	0.647428	0.0151918787734225	0.0026286426493171	5.77936250763076	7.49842040398457e-09	6	31033509	T	C	0.197703	0.0327001	1.48549091472815e-09	6.04594481362442	6	31033509	T	C	0.010374	0.00182957	1.42751276351584e-08	5.67018479752073	9.77918e-10	9.1824134116788e-09
rs2523891	6	31038976	T	C	6.04430592682763	13239	0.24096	0.0946762398279995	0.0141576343132282	6.68729236349457	2.27337425461314e-11	6	31038976	T	C	5.66979487207516	335821	0.647437	0.0151907710671618	0.00262865792961352	5.77890751627588	7.51872398266299e-09	6	31038976	T	C	0.197621	0.0326954	1.50058292381183e-09	6.04430592682763	6	31038976	T	C	0.0103734	0.00182959	1.43096825712066e-08	5.66979487207516	9.88883e-10	9.20472977280204e-09
rs2523884	6	31041155	T	C	6.04369592674938	13239	0.24096	0.0946749351609881	0.0141576343132282	6.68720021059795	2.27480573203401e-11	6	31041155	T	C	5.67369916921732	335821	0.647437	0.0152006413159215	0.00262865792961352	5.78266237865205	7.35275384850996e-09	6	31041155	T	C	0.197621	0.0326987	1.50629488034797e-09	6.04369592674938	6	31041155	T	C	0.0103806	0.0018296	1.39845984283744e-08	5.67369916921732	9.92995e-10	8.99521800319144e-09
rs2523883	6	31042070	T	C	6.04306757058415	13239	0.24096	0.0946542926507118	0.0141576343132282	6.68574216260634	2.2975724248494e-11	6	31042070	T	C	5.66724967205947	335821	0.647435	0.0151841146903507	0.00262865453388845	5.77638274432719	7.63236473760885e-09	6	31042070	T	C	0.197621	0.0327021	1.51230713101172e-09	6.04306757058415	6	31042070	T	C	0.0103688	0.0018296	1.4524125737214e-08	5.66724967205947	9.97248e-10	9.34501191705106e-09
rs2517489	6	31042306	A	G	6.04238931610598	13239	0.24096	0.0946861901708738	0.0141576343132282	6.68799518874448	2.26248573555884e-11	6	31042306	A	G	5.68968532423954	335821	0.647417	0.0152410055352715	0.00262862397502784	5.79809272077801	6.70733665602587e-09	6	31042306	A	G	0.197539	0.0326922	1.5186580620136e-09	6.04238931610598	6	31042306	A	G	0.0104111	0.00182982	1.27388434347395e-08	5.68968532423954	1.00186e-09	8.18395308800442e-09
rs2523881	6	31042608	G	T	6.0420751271644	13239	0.24096	0.0946594442927549	0.0141576343132282	6.68610603992716	2.29186986101865e-11	6	31042608	G	T	5.67754876722362	335821	0.647409	0.0152099721382387	0.00262861039485169	5.78631666679416	7.19465280608105e-09	6	31042608	G	T	0.197539	0.0326939	1.52163328611689e-09	6.0420751271644	6	31042608	G	T	0.0103877	0.00182961	1.36779181328629e-08	5.67754876722362	1.004e-09	8.79386270024834e-09
rs2905759	6	31044468	T	C	6.04113275635341	13239	0.24096	0.0945554462054011	0.0141576343132282	6.67876031499509	2.40971893064511e-11	6	31044468	T	C	5.62824535129049	335821	0.647394	0.0150841174857552	0.00262858493457505	5.73849347127669	9.55224451960452e-09	6	31044468	T	C	0.197539	0.032699	1.5305587341205e-09	6.04113275635341	6	31044468	T	C	0.0102971	0.00182954	1.82188097187935e-08	5.62824535129049	1.01046e-09	1.17582291751115e-08
rs2517478	6	31044802	T	G	6.04051565377532	13239	0.24096	0.0945523306824433	0.0141576343132282	6.67854025542237	2.41333939740978e-11	6	31044802	T	G	5.63122079199803	335821	0.647398	0.015091659481121	0.00262859172365649	5.74134786520892	9.39259191581715e-09	6	31044802	T	G	0.197456	0.0326886	1.53606643721463e-09	6.04051565377532	6	31044802	T	G	0.0103026	0.00182955	1.79093572620446e-08	5.63122079199803	1.0147e-09	1.15552467905628e-08
rs2517477	6	31044863	A	G	6.04014609704319	13239	0.24096	0.0945412942629491	0.0141576343132282	6.67776071702986	2.42620742144082e-11	6	31044863	A	G	5.62802671709829	335821	0.647398	0.0150834774689088	0.00262859172365649	5.73823516720467	9.56682150917453e-09	6	31044863	A	G	0.197456	0.0326906	1.53964288723534e-09	6.04014609704319	6	31044863	A	G	0.0102967	0.00182954	1.82460978683036e-08	5.62802671709829	1.01726e-09	1.17741929329708e-08
rs2523843	6	31046528	G	A	6.03997981126593	13239	0.24096	0.0945682782193403	0.0141576343132282	6.67966668209395	2.39486315361939e-11	6	31046528	G	A	5.64392531537638	335821	0.6474	0.0151239750906441	0.00262859511828602	5.75363432178391	8.7344986966915e-09	6	31046528	G	A	0.197456	0.0326915	1.54116806042366e-09	6.03997981126593	6	31046528	G	A	0.0103259	0.00182956	1.66356586339267e-08	5.64392531537638	1.01841e-09	1.07245117886348e-08
rs2523836	6	31047145	T	C	6.03944406381521	13239	0.24096	0.0945175283470565	0.0141576343132282	6.67608205268758	2.45414600454225e-11	6	31047145	T	C	5.62043955203078	335821	0.647401	0.0150640929488402	0.00262859681562299	5.73084957697093	9.99288555545922e-09	6	31047145	T	C	0.197456	0.0326944	1.5463222322497e-09	6.03944406381521	6	31047145	T	C	0.0102831	0.00182959	1.90655790508991e-08	5.62043955203078	1.02212e-09	1.2310397012592e-08
rs2106067	6	31048263	C	T	6.03833963557155	13239	0.24096	0.0944621918924472	0.0141576343132282	6.67217345797571	2.52042411219182e-11	6	31048263	C	T	5.59876492608684	335821	0.647282	0.0150075915459384	0.00262839493643473	5.70979320417326	1.1311352959631e-08	6	31048263	C	T	0.197374	0.0326868	1.55700497412465e-09	6.03833963557155	6	31048263	C	T	0.0102449	0.00182985	2.16047875476572e-08	5.59876492608684	1.02982e-09	1.39752833989064e-08
rs2535315	6	31052127	T	C	6.03695759270762	13239	0.24096	0.0944589249360064	0.0141576343132282	6.67194270216097	2.52439134984926e-11	6	31052127	T	C	5.60744190113902	335821	0.647417	0.015030831569223	0.00262862397502784	5.71813683205251	1.07698403828462e-08	6	31052127	T	C	0.197292	0.0326807	1.57047128489981e-09	6.03695759270762	6	31052127	T	C	0.0102596	0.00182964	2.05484940985396e-08	5.60744190113902	1.03954e-09	1.32858779256784e-08
rs2395163	6	32387809	C	T	5.71286579688007	13239	0.24096	0.0905804366136218	0.0141576343132282	6.39799239121384	1.5743313060621e-10	6	32387809	C	T	5.95345291693466	335821	0.775901	0.0181859242854459	0.00301181355419572	6.03819723837531	1.5584550218997e-09	6	32387809	C	T	0.218412	0.0382316	1.1107849835771e-08	5.71286579688007	6	32387809	C	T	0.012496	0.00209895	2.62790704993785e-09	5.95345291693466	1.13462e-09	1.7009190460059e-09
rs2517523	6	31026434	G	A	6.02085626911315	13239	0.24096	0.0941358889102819	0.0141576343132282	6.64912561149613	2.94839299370495e-11	6	31026434	G	A	5.55390656232373	335821	0.644428	0.014864092670859	0.00262361569493172	5.66549921910184	1.46597092477929e-08	6	31026434	G	A	0.196882	0.0327	1.73496213144223e-09	6.02085626911315	6	31026434	G	A	0.0101416	0.00182603	2.79582510309173e-08	5.55390656232373	1.15955e-09	1.8164851459812e-08
rs2535304	6	31054687	C	T	6.02065269620521	13239	0.24096	0.0941844675882977	0.0141576343132282	6.65255688235262	2.88044436645844e-11	6	31054687	C	T	5.58180423946979	335821	0.643887	0.0149299164316607	0.00262272318898508	5.69252466076613	1.25174512054262e-08	6	31054687	C	T	0.196717	0.0326737	1.73696073067805e-09	6.02065269620521	6	31054687	C	T	0.0101907	0.0018257	2.38215491024352e-08	5.58180423946979	1.16115e-09	1.5448069238746e-08
rs2517510	6	31030122	G	T	6.01821979346008	13239	0.24096	0.0941195498814918	0.0141576343132282	6.64797153247215	2.97159759649053e-11	6	31030122	G	T	5.56497546442341	335821	0.644363	0.0148912997712475	0.0026235082369704	5.67610177906046	1.37798809711563e-08	6	31030122	G	T	0.1968	0.0327007	1.76359963389799e-09	6.01821979346008	6	31030122	G	T	0.0101612	0.00182592	2.62361436429592e-08	5.56497546442341	1.18045e-09	1.70387619276938e-08
rs2517504	6	31032370	G	T	6.01685398415579	13239	0.24096	0.0941275901985355	0.0141576343132282	6.6485394463528	2.96015652968025e-11	6	31032370	G	T	5.57966494873562	335821	0.64448	0.0149295783473252	0.00262370170564229	5.69027276051201	1.26836601821717e-08	6	31032370	G	T	0.196635	0.0326807	1.77832035690695e-09	6.01685398415579	6	31032370	G	T	0.0101984	0.00182778	2.41190390130337e-08	5.57966494873562	1.19142e-09	1.56460442223599e-08
rs2517497	6	31036783	G	A	6.01668828943503	13239	0.24096	0.094093744651699	0.0141576343132282	6.64614882472155	3.00861060046315e-11	6	31036783	G	A	5.56255339656948	335821	0.644361	0.0148849341151399	0.00262350493154801	5.67368253672653	1.39760027914067e-08	6	31036783	G	A	0.196635	0.0326816	1.78016394214465e-09	6.01668828943503	6	31036783	G	A	0.010157	0.00182596	2.66090886252283e-08	5.56255339656948	1.19276e-09	1.7281929879099e-08
rs2844641	6	31037794	C	T	6.0165041948927	13239	0.24096	0.0941146744783599	0.0141576343132282	6.64762716680879	2.97855617750203e-11	6	31037794	C	T	5.57530171634555	335821	0.644806	0.0149215124668916	0.00262424182542904	5.68602798808455	1.30028094420181e-08	6	31037794	C	T	0.196635	0.0326826	1.78217357532112e-09	6.0165041948927	6	31037794	C	T	0.0101771	0.00182539	2.4726349296058e-08	5.57530171634555	1.19424e-09	1.60486523717498e-08
rs2246330	6	31041493	A	G	6.01541244196616	13239	0.24096	0.0939886805722183	0.0141576343132282	6.6387278052803	3.16402058279612e-11	6	31041493	A	G	5.51519299206132	335821	0.64498	0.0147701414298411	0.00262453074537954	5.62772657772965	1.8260022607876e-08	6	31041493	A	G	0.196553	0.0326749	1.79423779211038e-09	6.01541244196616	6	31041493	A	G	0.0100735	0.0018265	3.48618154894031e-08	5.51519299206132	1.2031e-09	2.27251098960993e-08
rs2249231	6	31043232	A	G	6.01482338324444	13239	0.24096	0.0940276322816917	0.0141576343132282	6.64147909187321	3.10550810591945e-11	6	31043232	A	G	5.54078179249313	335821	0.644323	0.0148289972438101	0.00262344213959649	5.65249639776348	1.58134113755213e-08	6	31043232	A	G	0.196553	0.0326781	1.80081873399417e-09	6.01482338324444	6	31043232	A	G	0.0101178	0.00182606	3.013630482136e-08	5.54078179249313	1.20791e-09	1.96072082804589e-08
rs2523895	6	31047471	C	A	6.01352861056272	13239	0.24096	0.093961725522679	0.0141576343132282	6.63682388200166	3.20514219137495e-11	6	31047471	C	A	5.51481098131993	335821	0.644329	0.0147628670765647	0.00262345205271643	5.62726772966124	1.83086446279656e-08	6	31047471	C	A	0.196471	0.0326715	1.8153484553014e-09	6.01352861056272	6	31047471	C	A	0.0100701	0.00182601	3.49429848566312e-08	5.51481098131993	1.21854e-09	2.27782983726147e-08
rs2535318	6	31051388	T	C	6.01281086076988	13239	0.24096	0.0939330062368732	0.0141576343132282	6.63479534494735	3.24953077478425e-11	6	31051388	T	C	5.50465498357065	335821	0.644318	0.0147368564872401	0.00262343387906385	5.6173920009369	1.9386126955226e-08	6	31051388	T	C	0.196471	0.0326754	1.82343379656277e-09	6.01281086076988	6	31051388	T	C	0.0100515	0.001826	3.70143391550437e-08	5.50465498357065	1.22448e-09	2.41496186467992e-08
rs9263473	6	31050179	G	A	6.01281086076988	13239	0.24096	0.0939481355416302	0.0141576343132282	6.63586397720767	3.22607242658585e-11	6	31050179	G	A	5.51286404311015	335821	0.644327	0.0147578101199459	0.00262344874828484	5.62534721884476	1.85135201323447e-08	6	31050179	G	A	0.196471	0.0326754	1.82343379656277e-09	6.01281086076988	6	31050179	G	A	0.0100666	0.00182602	3.53345854108902e-08	5.51286404311015	1.22448e-09	2.30361754532118e-08
rs9263474	6	31050244	C	A	6.01271885395659	13239	0.24096	0.0938716870126487	0.0141576343132282	6.63046416765687	3.34632902600203e-11	6	31050244	C	A	5.4720792447871	335821	0.644222	0.0146531419175941	0.00262327534745445	5.58581924379881	2.32601070629422e-08	6	31050244	C	A	0.196471	0.0326759	1.82439973295748e-09	6.01271885395659	6	31050244	C	A	0.00999333	0.00182624	4.45092216835033e-08	5.4720792447871	1.22524e-09	2.91059562908061e-08
rs2517511	6	31029918	C	A	6.01125468307975	13239	0.24096	0.0940345146187368	0.0141576343132282	6.64196521384054	3.09528027228154e-11	6	31029918	C	A	5.57149898680103	335821	0.644357	0.0149069688268814	0.0026234983208781	5.68209581391763	1.33054080809927e-08	6	31029918	C	A	0.196553	0.0326975	1.84077200146896e-09	6.01125468307975	6	31029918	C	A	0.010173	0.0018259	2.52766782332688e-08	5.57149898680103	1.23744e-09	1.64137715135388e-08
rs2517516	6	31028920	C	T	6.01108922760747	13239	0.24096	0.0939992925122688	0.0141576343132282	6.63947736130186	3.14797345461554e-11	6	31028920	C	T	5.55363871363477	335821	0.644357	0.0148615409032529	0.0026234983208781	5.66478003244107	1.47213262178997e-08	6	31028920	C	T	0.196553	0.0326984	1.84268033034496e-09	6.01108922760747	6	31028920	C	T	0.0101405	0.00182592	2.79988375005385e-08	5.55363871363477	1.23883e-09	1.82062518465617e-08
rs3130933	6	31132085	C	T	5.9875591392188	13239	0.24096	0.0939846888775777	0.0141576343132282	6.63844585883697	3.1700774282126e-11	6	31132085	C	T	5.72362549720355	335821	0.14674	0.0206864436223211	0.00354924719477184	5.8284031759729	5.59602494446679e-09	6	31132085	C	T	0.318416	0.0531796	2.13010003741125e-09	5.9875591392188	6	31132085	C	T	0.0141737	0.00247635	1.04375843932355e-08	5.72362549720355	1.45215e-09	6.71708402774496e-09
rs2844494	6	31483415	A	C	5.00005708251277	13239	0.24096	0.0801604892272045	0.0141576343132282	5.66199743924072	1.49621057767792e-08	6	31483415	A	C	5.68919434898816	335821	0.352406	0.0151125484417219	0.00262892467888209	5.74856653867629	9.00032263231554e-09	6	31483415	A	C	0.175187	0.035037	5.7312585380793e-07	5.00005708251277	6	31483415	A	C	0.01043	0.0018333	1.27743849712866e-08	5.68919434898816	6.93999e-09	8.88262976818967e-09
rs2516398	6	31481526	T	G	4.99974384225237	13239	0.24096	0.0801298957731491	0.0141576343132282	5.65983652355534	1.51517257730631e-08	6	31481526	T	G	5.67496295004795	335821	0.35092	0.0150908362623382	0.00263146758370097	5.73476046439227	9.7650253289738e-09	6	31481526	T	G	0.175664	0.0351346	5.74076805016828e-07	4.99974384225237	6	31481526	T	G	0.0104156	0.00183536	1.38838527831345e-08	5.67496295004795	7.60885e-09	9.66172949899268e-09
rs2395045	6	31484517	T	C	5.42641446822632	13239	0.24096	0.0860528975836853	0.0141576343132282	6.07819750671776	1.2154099756395e-09	6	31484517	T	C	5.66269439723349	335821	0.246036	0.0167460188443645	0.00291592644597227	5.74294967813592	9.30413835200941e-09	6	31484517	T	C	0.222394	0.0409836	5.74976374358488e-08	5.42641446822632	6	31484517	T	C	0.011528	0.00203578	1.49114542365604e-08	5.66269439723349	7.95034e-09	1.0057229708558e-08
rs7453967	6	31314243	T	G	5.19230648104019	13239	0.24096	0.0823426027477466	0.0141576343132282	5.81612725162776	6.02266253244798e-09	6	31314243	T	G	5.41959995053748	335821	0.167816	0.0184713930770126	0.00336066199866893	5.49635550505485	3.87720503417639e-08	6	31314243	T	G	0.247308	0.0476297	2.07696893075311e-07	5.19230648104019	6	31314243	T	G	0.0127101	0.00234521	5.97736807928878e-08	5.41959995053748	3.75697e-08	4.16350055597469e-08

## Sheet: Supplementary Table S6
Supplementary Table S6 Using a combination of MTAG and CPASSOC methods to screen for shared SNPs between PBC and HGSR.
SNP	CHR_PBC	BP_PBC	A1_PBC	A2_PBC	Z_PBC	N_PBC	FRQ_PBC	mtag_beta_PBC	mtag_se_PBC	mtag_z_PBC	mtag_pval_PBC	CHR_HGSR	BP_HGSR	A1_HGSR	A2_HGSR	Z_HGSR	N_HGSR	FRQ_HGSR	mtag_beta_HGSR	mtag_se_HGSR	mtag_z_HGSR	mtag_pval_HGSR	CHR.x	BP.x	effect_allele.x	other_allele.x	beta.x	se.x	pval.x	Z.x	CHR.y	BP.y	effect_allele.y	other_allele.y	beta.y	se.y	pval.y	Z.y	p_Shet	p_Shom
rs9275219	6	32659077	T	C	14.5484716802985	13239	0.24096	0.211424440287029	0.0141090185623461	14.985056497925	9.19473471809982e-51	6	32659077	T	C	4.9730000638761	335842	0.753525	0.016251093633361	0.00291734091304547	5.57051579426011	2.53986289605783e-08	6	32659077	T	C	0.511565	0.0351628	5.97035286583841e-48	14.5484716802985	6	32659077	T	C	0.010121	0.00203519	6.59553455476277e-07	4.9730000638761	1.32528e-50	3.09138310582737e-07
rs9275408	6	32670110	C	T	14.1951588974336	13239	0.24096	0.206615565726188	0.0141090185623461	14.6442195687232	1.4667574673071e-48	6	32670110	C	T	5.0128267111326	335842	0.75115	0.0162573094371909	0.00290797249723659	5.59059944777333	2.26287038680521e-08	6	32670110	C	T	0.500412	0.0352523	9.81747943019978e-46	14.1951588974336	6	32670110	C	T	0.0101611	0.00202702	5.36623886100917e-07	5.0128267111326	3.18121e-48	2.54928480950039e-07
rs9275375	6	32668632	A	G	14.1411135537811	13239	0.24096	0.205741734984912	0.0141090185623461	14.5822853712867	3.64120130415515e-48	6	32668632	A	G	4.95074219694242	335842	0.751153	0.0160745111022615	0.00290798421880253	5.5277160716095	3.24426537616072e-08	6	32668632	A	G	0.496585	0.0351164	2.11884896208663e-45	14.1411135537811	6	32668632	A	G	0.0100356	0.00202709	7.39605275058237e-07	4.95074219694242	7.2703e-48	3.5536101793751e-07
rs9275418	6	32670244	G	A	14.1407108726728	13239	0.24096	0.205863041053738	0.0141090185623461	14.5908831393235	3.21014970392477e-48	6	32670244	G	A	5.01332057189655	335842	0.751143	0.0162502798137643	0.00290794514801176	5.58823464220949	2.29389561825273e-08	6	32670244	G	A	0.496585	0.0351174	2.1315719667169e-45	14.1407108726728	6	32670244	G	A	0.0101617	0.00202694	5.35241772210468e-07	5.01332057189655	7.31513e-48	2.55002801738645e-07
rs9275390	6	32669156	C	T	14.139612377711	13239	0.24096	0.205855119019888	0.0141090185623461	14.5903216520864	3.23668008480254e-48	6	32669156	C	T	5.01691138042224	335842	0.751218	0.0162618536802842	0.0029082382552659	5.59165111415446	2.24920418493555e-08	6	32669156	C	T	0.496463	0.0351115	2.16520987930794e-45	14.139612377711	6	32669156	C	T	0.0101754	0.00202822	5.25351528298363e-07	5.01691138042224	7.43881e-48	2.50178566649985e-07
rs9275374	6	32668526	T	C	14.1394512971386	13239	0.24096	0.205858006658938	0.0141090185623461	14.5905263182747	3.22698438497549e-48	6	32668526	T	C	5.01943509959255	335842	0.751159	0.0162676397253029	0.0029080076627797	5.59408420188035	2.21789305384963e-08	6	32668526	T	C	0.496463	0.0351119	2.16970155380084e-45	14.1394512971386	6	32668526	T	C	0.0101757	0.00202726	5.18465663984243e-07	5.01943509959255	7.45712e-48	2.46832732836157e-07
rs9275393	6	32669439	A	G	14.1394512971386	13239	0.24096	0.205849908399048	0.0141090185623461	14.5899523407259	3.25424898549161e-48	6	32669439	A	G	5.01544092981037	335842	0.751157	0.0162563593777204	0.00290799984799541	5.59022016074949	2.26781889739906e-08	6	32669439	A	G	0.496463	0.0351119	2.16920201906873e-45	14.1394512971386	6	32669439	A	G	0.0101667	0.00202708	5.29346444051556e-07	5.01544092981037	7.45712e-48	2.52151635032382e-07
rs9275406	6	32669955	T	G	14.1393707582286	13239	0.24096	0.205843141172763	0.0141090185623461	14.589472702383	3.27720813434344e-48	6	32669955	T	G	5.01265298270019	335842	0.751151	0.0162483729437078	0.00290797640439393	5.5875188392714	2.30336777309778e-08	6	32669955	T	G	0.496463	0.0351121	2.17270117886376e-45	14.1393707582286	6	32669955	T	G	0.0101616	0.00202719	5.37130730394836e-07	5.01265298270019	7.46629e-48	2.55930790778821e-07
rs9275407	6	32670037	T	G	14.1390888792691	13239	0.24096	0.205867399245407	0.0141090185623461	14.5911920333582	3.19564681247601e-48	6	32670037	T	G	5.02654142534361	335842	0.751132	0.0162869858489066	0.00290790217375748	5.6009400852234	2.13192421753859e-08	6	32670037	T	G	0.496463	0.0351128	2.18072046882494e-45	14.1390888792691	6	32670037	T	G	0.0101889	0.00202702	4.99689242630594e-07	5.02654142534361	7.49848e-48	2.37640905343535e-07
rs9275439	6	32671521	C	T	14.1390601198696	13239	0.24096	0.20589429436597	0.0141090185623461	14.5930982694613	3.10757911487717e-48	6	32671521	C	T	5.04000276221293	335842	0.751169	0.0163256620089493	0.00290804673857969	5.61396135501002	1.97746396102063e-08	6	32671521	C	T	0.496585	0.0351215	2.18222737756593e-45	14.1390601198696	6	32671521	C	T	0.0102179	0.00202736	4.65768377969031e-07	5.04000276221293	7.50178e-48	2.21119485510087e-07
rs9275427	6	32670915	T	C	14.138973842027	13239	0.24096	0.205850947965769	0.0141090185623461	14.5900260217348	3.25073626498823e-48	6	32670915	T	C	5.01921265124722	335842	0.751144	0.0162666135892547	0.00290794905494996	5.59384407425069	2.22096431221433e-08	6	32670915	T	C	0.496524	0.0351174	2.18474120647903e-45	14.138973842027	6	32670915	T	C	0.0101755	0.00202731	5.19086817658165e-07	5.01921265124722	7.51166e-48	2.47132434582001e-07
rs9275424	6	32670576	G	A	14.1380822604392	13239	0.24096	0.20584931505293	0.0141090185623461	14.5899102863396	3.25625560942494e-48	6	32670576	G	A	5.02449299741997	335842	0.751153	0.0162815298301005	0.00290798421880253	5.59890584165723	2.1570891149985e-08	6	32670576	G	A	0.496463	0.0351153	2.21207577646412e-45	14.1380822604392	6	32670576	G	A	0.0101852	0.00202711	5.05068170445181e-07	5.02449299741997	7.61457e-48	2.40270377773704e-07
rs9275425	6	32670874	A	C	14.1375588752898	13239	0.24096	0.205834665652608	0.0141090185623461	14.5888719858896	3.3061905495025e-48	6	32670874	A	C	5.02084021841535	335842	0.751148	0.0162710649061937	0.00290796468301582	5.59534474446199	2.20183808113744e-08	6	32670874	A	C	0.496463	0.0351166	2.22894832450507e-45	14.1375588752898	6	32670874	A	C	0.0101789	0.00202733	5.14718763190654e-07	5.02084021841535	7.67563e-48	2.45012430168968e-07
rs9275428	6	32670978	G	A	14.1371160411986	13239	0.24096	0.205819234938043	0.0141090185623461	14.5877783085019	3.3596131633088e-48	6	32670978	G	A	5.01625226273916	335842	0.751141	0.0162579378247763	0.00290793733422926	5.59088314366495	2.25917589519544e-08	6	32670978	G	A	0.496463	0.0351177	2.24284881586928e-45	14.1371160411986	6	32670978	G	A	0.01017	0.00202741	5.27144888857622e-07	5.01625226273916	7.72768e-48	2.51093848543815e-07
rs9275388	6	32669084	C	T	14.1042728341827	13239	0.24096	0.205356011619384	0.0141090185623461	14.5549465905045	5.4328351661247e-48	6	32669084	C	T	5.01196414210934	335842	0.751122	0.0162404738510697	0.00290786310954017	5.58502007807303	2.33673216116799e-08	6	32669084	C	T	0.496524	0.0352038	3.57519718745026e-45	14.1042728341827	6	32669084	C	T	0.0101587	0.00202689	5.39076003478511e-07	5.01196414210934	1.27485e-47	2.57357412754913e-07
rs9275464	6	32672082	G	A	14.1031511137116	13239	0.24096	0.205383107980858	0.0141090185623461	14.5568670898896	5.28237493617615e-48	6	32672082	G	A	5.03298502195734	335842	0.755856	0.0164050879791117	0.00292671135701714	5.60529754318907	2.07897506500962e-08	6	32672082	G	A	0.496524	0.0352066	3.63161666207504e-45	14.1031511137116	6	32672082	G	A	0.0102689	0.00204032	4.83181168775537e-07	5.03298502195734	1.29681e-47	2.30034119081197e-07
rs5007265	6	32378866	G	T	11.6739178122258	13239	0.24096	0.172206277486627	0.0141090185623461	12.2054044174418	2.90859715228355e-34	6	32378866	G	T	5.25108950147831	335842	0.471019	0.0143302984745209	0.00251873921234618	5.68947289353249	1.27432115393489e-08	6	32378866	G	T	0.383166	0.0328224	1.73260674194744e-31	11.6739178122258	6	32378866	G	T	0.00921771	0.00175539	1.51293405977692e-07	5.25108950147831	6.22901e-33	8.01308723676838e-08
rs5007263	6	32378982	G	A	11.6737044145873	13239	0.24096	0.172164299404694	0.0141090185623461	12.2024291515331	3.01687464924227e-34	6	32378982	G	A	5.23184195235328	335842	0.471097	0.0142832408933041	0.00251871639201495	5.67084128192682	1.42097997807146e-08	6	32378982	G	A	0.383166	0.032823	1.73700072613737e-31	11.6737044145873	6	32378982	G	A	0.00918408	0.00175542	1.67919062154084e-07	5.23184195235328	6.24579e-33	8.9132760521455e-08
rs5007259	6	32379101	C	T	11.6718928555104	13239	0.24096	0.172162506025019	0.0141090185623461	12.2023020427858	3.02158860087742e-34	6	32379101	C	T	5.24332	335842	0.471069	0.0143110238325309	0.00251872457678124	5.68185341281713	1.33242841574172e-08	6	32379101	C	T	0.383019	0.0328155	1.77459805015171e-31	11.6718928555104	6	32379101	C	T	0.00920308	0.0017552	1.57811991346554e-07	5.24332	6.39008e-33	8.36610708894538e-08
rs6926737	6	32375745	A	G	11.6638786594492	13239	0.24096	0.171794784480947	0.0141090185623461	12.1762	4.16027193993085e-34	6	32375745	A	G	5.11666049505797	335842	0.471032	0.0140013967835384	0.00251873540464356	5.55889942140223	2.71481076611878e-08	6	32375745	A	G	0.384193	0.0329387	1.94984459975804e-31	11.6638786594492	6	32375745	A	G	0.00898153	0.00175535	3.11178798784744e-07	5.11666049505797	7.0692e-33	1.67368316628998e-07
rs6932542	6	32380262	G	A	11.6587687835025	13239	0.24096	0.17196595098616	0.0141090185623461	12.1883708796797	3.58516825972778e-34	6	32380262	G	A	5.23596087718899	335842	0.471056	0.0142913813592332	0.00251872837957241	5.67404626681476	1.39463438742007e-08	6	32380262	G	A	0.382579	0.0328147	2.07014134879104e-31	11.6587687835025	6	32380262	G	A	0.00919707	0.00175652	1.64236620511787e-07	5.23596087718899	7.53915e-33	8.72002932245908e-08
rs660895	6	32577380	G	A	11.2248363988587	13239	0.24096	0.170582422503002	0.0141090185623461	12.0903110127199	1.18836009254868e-33	6	32577380	G	A	7.51550382154575	335842	0.784679	0.0240309894359071	0.00305867437087228	7.85666812549708	3.94486249474314e-15	6	32577380	G	A	0.427618	0.0380957	3.0789313097416e-29	11.2248363988587	6	32577380	G	A	0.0160574	0.00213657	5.68329239138338e-14	7.51550382154575	1.60881e-30	2.42260003748239e-14
rs3763317	6	32376788	T	C	10.8593245792583	13239	0.24096	0.163988036851231	0.0141090185623461	11.6229230351202	3.15165340741464e-31	6	32376788	T	C	6.75796026399791	335842	0.550951	0.0179583417824886	0.00252766257633887	7.10472273894245	1.20564331369462e-12	6	32376788	T	C	0.349983	0.0322288	1.80052849969888e-27	10.8593245792583	6	32376788	T	C	0.0118982	0.00176062	1.40184500979848e-11	6.75796026399791	1.25944e-28	6.65009342664112e-12
rs1049225	6	32627747	G	A	10.0432331437102	13239	0.24096	0.150526735302262	0.0141090185623461	10.6688310485312	1.4240660265637e-26	6	32627747	G	A	5.68910982748146	335842	0.235235	0.0178684612989834	0.00296419985204604	6.02808926214935	1.65909416464341e-09	6	32627747	G	A	0.433247	0.0431382	9.83784554914415e-24	10.0432331437102	6	32627747	G	A	0.0117991	0.00207398	1.2779680608153e-08	5.68910982748146	1.26781e-24	7.11106133096489e-09
rs3135006	6	32667119	C	T	9.9762937345735	13239	0.24096	0.149292999315257	0.0141090185623461	10.5813879722072	3.635325314174e-26	6	32667119	C	T	5.53752702264824	335842	0.236851	0.017382253463686	0.00295719642175644	5.87795025579047	4.15377691297206e-09	6	32667119	C	T	0.429246	0.0430266	1.93597613764143e-23	9.9762937345735	6	32667119	C	T	0.01145	0.00206771	3.06951669615846e-08	5.53752702264824	2.6157e-24	1.73968599663545e-08
rs6937545	6	32418031	C	A	9.62200730898092	13239	0.24096	0.148173548472623	0.0141090185623461	10.5020450442999	8.45287073654395e-26	6	32418031	C	A	7.40367250273059	335842	0.34083	0.020330858492173	0.00265249655799911	7.6648010836664	1.79108571073077e-14	6	32418031	C	A	0.354392	0.0368314	6.45505578769005e-22	9.62200730898092	6	32418031	C	A	0.0136925	0.00184942	1.32770013679008e-13	7.40367250273059	1.11547e-22	6.47952571229723e-14
rs7763262	6	32424882	C	T	9.61387006516011	13239	0.24096	0.147960452354548	0.0141090185623461	10.486941504877	9.91872390065651e-26	6	32424882	C	T	7.35411351610833	335842	0.339767	0.0202178422777971	0.00265450312852344	7.6164318890983	2.60784096575358e-14	6	32424882	C	T	0.354249	0.0368477	6.98714892561127e-22	9.61387006516011	6	32424882	C	T	0.0136346	0.00185401	1.92619388592495e-13	7.35411351610833	1.21396e-22	9.449074305403e-14
rs644045	6	31883957	G	A	5.63780886242451	13239	0.24096	0.09623934368853	0.0141090185623461	6.82112248015406	9.0331883050919e-12	6	31883957	G	A	8.98420630857245	335842	0.388714	0.023176279567589	0.0025792006947058	8.98583798273699	2.56770054815321e-19	6	31883957	G	A	0.199305	0.0353515	1.72234441059164e-08	5.63780886242451	6	31883957	G	A	0.0161439	0.00179692	2.61878593654755e-19	8.98420630857245	4.04384e-20	1.59753102774484e-19
rs9275595	6	32681355	C	T	9.03714785826946	13239	0.24096	0.135628494248666	0.0141090185623461	9.61289360059594	7.05382736471889e-22	6	32681355	C	T	5.20839379076417	335842	0.776042	0.0166183667585243	0.00301575842479842	5.51050993404257	3.57795615631072e-08	6	32681355	C	T	0.334041	0.0369631	1.60805167218626e-19	9.03714785826946	6	32681355	C	T	0.0109482	0.00210203	1.90585563257144e-07	5.20839379076417	4.07252e-20	1.17335249594492e-07
rs2072633	6	31919578	G	A	4.76380487716403	13239	0.24096	0.0841427666124802	0.0141090185623461	5.96375759523336	2.46502349844021e-09	6	31919578	G	A	8.98375325902565	335842	0.47527	0.0225066403722348	0.00251758594314881	8.93977043106825	3.89979671274596e-19	6	31919578	G	A	0.15759	0.0330807	1.89980925925721e-06	4.76380487716403	6	31919578	G	A	0.0157814	0.00175666	2.63026799189539e-19	8.98375325902565	4.4265e-20	1.73856335137279e-19
rs9271588	6	32590953	C	T	8.96264115481197	13239	0.24096	0.136828566635875	0.0141090185623461	9.69795071366909	3.07614839952753e-22	6	32590953	C	T	6.30885025839131	335842	0.490887	0.0165261189635242	0.00251492242996679	6.57122413264348	4.99032742840259e-11	6	32590953	C	T	0.290887	0.0324555	3.1695674630435e-19	8.96264115481197	6	32590953	C	T	0.0110726	0.00175509	2.8150103761297e-10	6.30885025839131	8.41066e-20	1.5853807662066e-10
rs9275582	6	32680070	T	C	8.9385596093856	13239	0.24096	0.134242991051401	0.0141090185623461	9.51469377251126	1.8224886728329e-21	6	32680070	T	C	5.19798470929098	335842	0.776008	0.0165715812514101	0.00301559559386819	5.49529296471523	3.90062318370328e-08	6	32680070	T	C	0.32952	0.036865	3.94275689595591e-19	8.9385596093856	6	32680070	T	C	0.0109258	0.00210193	2.01562622379982e-07	5.19798470929098	1.06189e-19	1.24882841319916e-07
rs9275555	6	32677088	T	C	8.92288662478435	13239	0.24096	0.134023740407233	0.0141090185623461	9.49915402088367	2.11602316225694e-21	6	32677088	T	C	5.19682737467651	335842	0.771249	0.0164430099075877	0.00299325450969417	5.49335509370626	3.94368710879516e-08	6	32677088	T	C	0.328944	0.0368652	4.54359904929339e-19	8.92288662478435	6	32677088	T	C	0.0108437	0.0020866	2.02810296514438e-07	5.19682737467651	1.23546e-19	1.25783074059381e-07
rs9275523	6	32674994	A	C	8.91288482043296	13239	0.24096	0.133938815293206	0.0141090185623461	9.49313481312298	2.24188773060077e-21	6	32674994	A	C	5.2232110764453	335842	0.771237	0.0165175424139634	0.00299319928748242	5.51835705796133	3.42183637536535e-08	6	32674994	A	C	0.328512	0.0368581	4.97164373725243e-19	8.91288482043296	6	32674994	A	C	0.0108987	0.00208659	1.75934090403025e-07	5.2232110764453	1.36059e-19	1.08929746591259e-07
rs9275522	6	32674970	T	C	8.91182095625636	13239	0.24096	0.13392409209057	0.0141090185623461	9.49209128181204	2.26444954528951e-21	6	32674970	T	C	5.2232110764453	335842	0.771237	0.0165173761677152	0.00299319928748242	5.5183015166384	3.42291780332807e-08	6	32674970	T	C	0.328512	0.0368625	5.01995703378949e-19	8.91182095625636	6	32674970	T	C	0.0108987	0.00208659	1.75934090403025e-07	5.2232110764453	1.37461e-19	1.08936151477133e-07
rs9275596	6	32681631	T	C	8.86061182653211	13239	0.24096	0.137314601765536	0.0141090185623461	9.73239925645848	2.19356979722733e-22	6	32681631	T	C	7.24499681678523	335842	0.382897	0.019324712507162	0.00258644139526526	7.47154470328915	7.92588330065753e-14	6	32681631	T	C	0.312932	0.0353172	7.95792789897093e-19	8.86061182653211	6	32681631	T	C	0.013087	0.00180635	4.33411070310178e-13	7.24499681678523	2.24876e-19	2.27219189710009e-13
rs1612904	6	32669018	A	C	8.81740579985428	13239	0.24096	0.136512263046212	0.0141090185623461	9.67553217418915	3.83093291741614e-22	6	32669018	A	C	7.14418656179028	335842	0.382461	0.0190707622918904	0.00258700149622918	7.37176314729157	1.68385989235763e-13	6	32669018	A	C	0.311019	0.0352733	1.1716556739113e-18	8.81740579985428	6	32669018	A	C	0.0128974	0.0018053	9.06984781505791e-13	7.14418656179028	3.39897e-19	4.81188806841841e-13
rs9275245	6	32660943	G	A	5.30729163440874	13239	0.24096	0.0908474120448519	0.0141090185623461	6.43896041694237	1.2029456408789e-10	6	32660943	G	A	8.58086447520513	335842	0.517273	0.0215832633648664	0.00251600646501913	8.57838152045538	9.62173532608251e-18	6	32660943	G	A	0.171382	0.0322918	1.11270489859636e-07	5.30729163440874	6	32660943	G	A	0.0150698	0.00175621	9.45583749597545e-18	8.58086447520513	1.96787e-18	6.06372799661981e-18
rs6457617	6	32663851	T	C	5.31451575443214	13239	0.24096	0.0909131769568329	0.0141090185623461	6.4436216137287	1.16655711520584e-10	6	32663851	T	C	8.56399050854402	335842	0.521959	0.0215510753164669	0.00251693317316342	8.56243445247313	1.10508870803337e-17	6	32663851	T	C	0.171619	0.0322925	1.06944880615478e-07	5.31451575443214	6	32663851	T	C	0.0150501	0.00175737	1.09496440146674e-17	8.56399050854402	2.30166e-18	7.02200573227845e-18
rs9275224	6	32659878	G	A	5.29618515869108	13239	0.24096	0.0905460038628699	0.0141090185623461	6.41759761409042	1.38441591651938e-10	6	32659878	G	A	8.50801606059743	335842	0.516928	0.0214039831331923	0.00251594702172551	8.5073266441488	1.77989569195304e-17	6	32659878	G	A	0.171026	0.0322923	1.1824968703831e-07	5.29618515869108	6	32659878	G	A	0.0149388	0.00175585	1.77705144231456e-17	8.50801606059743	3.87736e-18	1.14439643734976e-17
rs410851	6	31936668	C	T	4.82713028430829	13239	0.24096	0.0834832475846273	0.0141090185623461	5.91701309454832	3.27840602206625e-09	6	31936668	C	T	8.22622574532255	335842	0.323865	0.0220586537326178	0.00268672821431001	8.2102289376087	2.20767154095388e-16	6	31936668	C	T	0.178529	0.0369845	1.38522397637719e-06	4.82713028430829	6	31936668	C	T	0.0154106	0.00187335	1.93909907861485e-16	8.22622574532255	5.26252e-17	1.3174277600368e-16
rs3117572	6	31717692	G	A	8.24061735807061	13239	0.24096	0.12521839180656	0.0141090185623461	8.87506039156685	6.98954770653266e-19	6	31717692	G	A	5.51091722695689	335842	0.192604	0.0183691498395493	0.0031882069575769	5.76159267073121	8.3323892530856e-09	6	31717692	G	A	0.393932	0.0478037	1.71316818271581e-16	8.24061735807061	6	31717692	G	A	0.0122538	0.00222355	3.57248159470973e-08	5.51091722695689	6.96513e-17	2.24473688673789e-08
rs389883	6	31947460	T	G	4.80625883040746	13239	0.24096	0.0831024337739003	0.0141090185623461	5.89002228657367	3.86143540025537e-09	6	31947460	T	G	8.18086679801588	335842	0.324328	0.0219296746659552	0.00268572950392166	8.16525812965671	3.20748597559315e-16	6	31947460	T	G	0.177573	0.0369462	1.53787132784224e-06	4.80625883040746	6	31947460	T	G	0.0153217	0.00187287	2.8274829840696e-16	8.18086679801588	7.90336e-17	1.92867200916183e-16
rs3131283	6	32119898	C	T	8.21864551604529	13239	0.24096	0.12819362323297	0.0141090185623461	9.08593483426908	1.02811320107445e-19	6	32119898	C	T	7.12831553289073	335842	0.144225	0.0262143371965511	0.0035786760077762	7.3251496194652	2.38632323434055e-13	6	32119898	C	T	0.453029	0.0551221	2.05825889054205e-16	8.21864551604529	6	32119898	C	T	0.0177803	0.00249432	1.0181224173777e-12	7.12831553289073	8.47066e-17	5.65245955579477e-13
rs9267649	6	31824828	G	A	8.21724398773765	13239	0.24096	0.124644453632579	0.0141090185623461	8.83438157528741	1.00653527579115e-18	6	31824828	G	A	5.38738424528597	335842	0.189716	0.0180882885767529	0.00320665207992694	5.64086409310891	1.69198877627027e-08	6	31824828	G	A	0.392154	0.0477233	2.08209240522012e-16	8.21724398773765	6	31824828	G	A	0.0120484	0.00223641	7.15434699231732e-08	5.38738424528597	8.5769e-17	4.54447593869964e-08
rs3134943	6	32147761	C	T	8.21044432837599	13239	0.24096	0.128628080153471	0.0141090185623461	9.11672768627232	7.742682793797e-20	6	32147761	C	T	7.39857480641256	335842	0.148994	0.0267851852140836	0.00353078889695707	7.58617577991362	3.29485367621541e-14	6	32147761	C	T	0.448007	0.0545655	2.20394118181011e-16	8.21044432837599	6	32147761	C	T	0.018211	0.00246142	1.37943105819753e-13	7.39857480641256	9.11133e-17	7.50635553972459e-14
rs3130283	6	32138545	C	A	8.19746051897662	13239	0.24096	0.128659610819739	0.0141090185623461	9.1189624743356	7.58469393096273e-20	6	32138545	C	A	7.50275049833752	335842	0.148387	0.0271843882417965	0.00353674203879477	7.68627961655362	1.51475260898799e-14	6	32138545	C	A	0.436491	0.0532471	2.45470891568503e-16	8.19746051897662	6	32138545	C	A	0.0184807	0.00246319	6.26325364758222e-14	7.50275049833752	1.02246e-16	3.3842351505532e-14
rs9267577	6	31813774	C	T	8.15846323413636	13239	0.24096	0.123807192769686	0.0141090185623461	8.77503932839812	1.70844149070727e-18	6	31813774	C	T	5.37565924734066	335842	0.189722	0.0180418565240109	0.00320661324619195	5.62645231551909	1.83953607078092e-08	6	31813774	C	T	0.388608	0.0476325	3.39312610162932e-16	8.15846323413636	6	31813774	C	T	0.0120275	0.0022374	7.63624757106767e-08	5.37565924734066	1.44395e-16	4.87095719919713e-08
rs419788	6	31928799	C	T	4.85043627272875	13239	0.24096	0.0835712762905531	0.0141090185623461	5.92325227451231	3.15636063935609e-09	6	31928799	C	T	8.11056162955439	335842	0.325944	0.0217252034069339	0.00268227293973203	8.09954985755637	5.51629162247685e-16	6	31928799	C	T	0.178887	0.0368806	1.23182779698901e-06	4.85043627272875	6	31928799	C	T	0.0151704	0.00187045	5.05591774766218e-16	8.11056162955439	1.46791e-16	3.44589045757528e-16
rs2227956	6	31778272	A	G	8.1512861404845	13239	0.24096	0.124027080947016	0.0141090185623461	8.79062426624184	1.48731199603348e-18	6	31778272	A	G	5.53310013668081	335842	0.192572	0.018423865963481	0.00318840865791015	5.77838914022927	7.54192119827615e-09	6	31778272	A	G	0.387429	0.0475298	3.60080829173483e-16	8.1512861404845	6	31778272	A	G	0.0123065	0.00222416	3.14832820417709e-08	5.53310013668081	1.53838e-16	1.98536319046746e-08
rs3130279	6	32112626	G	A	8.13557139177471	13239	0.24096	0.128226090448266	0.0141090185623461	9.08823600179202	1.00658853948456e-19	6	32112626	G	A	7.71137270273691	335842	0.150642	0.0277139723589891	0.00351482758181341	7.88487392735509	3.14853227861271e-15	6	32112626	G	A	0.435873	0.0535762	4.10015240506613e-16	8.13557139177471	6	32112626	G	A	0.018886	0.00244911	1.24824547392454e-14	7.71137270273691	1.76691e-16	6.66749553513236e-15
rs437179	6	31929014	C	A	4.86682303176562	13239	0.24096	0.083730914255634	0.0141090185623461	5.93456687902399	2.94622219122058e-09	6	31929014	C	A	8.07744514391373	335842	0.325894	0.02164242204819	0.0026823792098554	8.06836780149245	7.12441524216116e-16	6	31929014	C	A	0.179486	0.0368795	1.13412258735055e-06	4.86682303176562	6	31929014	C	A	0.015115	0.00187126	6.635902555061e-16	8.07744514391373	1.96217e-16	4.52334132279245e-16
rs440454	6	31927342	G	A	4.84757767545786	13239	0.24096	0.0833924449538563	0.0141090185623461	5.91057730807814	3.40910807449815e-09	6	31927342	G	A	8.04187172376204	335842	0.326518	0.021536785428132	0.00268105604624027	8.03294860558166	9.51575365434255e-16	6	31927342	G	A	0.178768	0.0368778	1.24979850260639e-06	4.84757767545786	6	31927342	G	A	0.0150498	0.00187143	8.87360310778668e-16	8.04187172376204	2.68517e-16	6.06999906878258e-16
rs3135391	6	32410987	G	A	8.06270978540603	13239	0.24096	0.125122988256038	0.0141090185623461	8.86829850730818	7.42720094843008e-19	6	32410987	G	A	6.67821704205387	335842	0.147216	0.0244181761768968	0.00354834161500905	6.88157421867468	5.9194719765481e-12	6	32410987	G	A	0.448947	0.0556819	7.46276902018144e-16	8.06270978540603	6	32410987	G	A	0.016536	0.00247611	2.42214422857512e-11	6.67821704205387	3.34667e-16	1.40780865686578e-11
rs3135388	6	32413051	G	A	8.04630681001524	13239	0.24096	0.124886082049565	0.0141090185623461	8.85150738853363	8.63450563999183e-19	6	32413051	G	A	6.67333448944777	335842	0.146695	0.0244342023169788	0.00355355181346192	6.8759943852274	6.15589248631711e-12	6	32413051	G	A	0.447851	0.0556592	8.53296570195113e-16	8.04630681001524	6	32413051	G	A	0.016547	0.00247957	2.50495541277255e-11	6.67333448944777	3.86118e-16	1.4576647790698e-11
rs3135350	6	32392981	T	C	8.04176376661488	13239	0.24096	0.124967695088113	0.0141090185623461	8.85729184747298	8.19816996186422e-19	6	32392981	T	C	6.74459684542078	335842	0.1467	0.0246779954114139	0.00355350166581355	6.94469785924922	3.79271167467604e-12	6	32392981	T	C	0.447225	0.0556128	8.85523314502856e-16	8.04176376661488	6	32392981	T	C	0.0167237	0.00247957	1.53709248761617e-11	6.74459684542078	4.01698e-16	8.90060170813756e-12
rs3135352	6	32392906	A	C	8.04060689119339	13239	0.24096	0.124972305591393	0.0141090185623461	8.85761862450987	8.17418104455201e-19	6	32392906	A	C	6.75476735931853	335842	0.146737	0.0247101641262882	0.00355313066123821	6.95447662419404	3.53873308293516e-12	6	32392906	A	C	0.447069	0.0556014	8.93922770479138e-16	8.04060689119339	6	32392906	A	C	0.0167475	0.00247936	1.43284759806459e-11	6.75476735931853	4.05764e-16	8.29245069395567e-12
rs3129868	6	32404377	C	A	8.0336945403875	13239	0.24096	0.125487818224083	0.0141090185623461	8.89415643402596	5.8864726405033e-19	6	32404377	C	A	7.05620710199218	335842	0.150871	0.0254516041412644	0.00351263263488754	7.24573469154688	4.30101307297425e-13	6	32404377	C	A	0.433556	0.0539672	9.45801503371012e-16	8.0336945403875	6	32404377	C	A	0.0172918	0.00245058	1.71395730750843e-12	7.05620710199218	4.30913e-16	9.702166680295e-13
rs3129889	6	32413545	A	G	8.03009993783084	13239	0.24096	0.124703488122545	0.0141090185623461	8.8385657422942	9.69551814125632e-19	6	32413545	A	G	6.6939009242979	335842	0.146703	0.0245013452257587	0.00355347157858422	6.89504	5.38478843082002e-12	6	32413545	A	G	0.446912	0.0556546	9.73867785328634e-16	8.03009993783084	6	32413545	A	G	0.016599	0.00247972	2.17620598318573e-11	6.6939009242979	4.44593e-16	1.26619378443558e-11
rs521977	6	31836827	G	T	7.98930010336026	13239	0.24096	0.125077310441397	0.0141090185623461	8.86506101673162	7.64621870937713e-19	6	31836827	G	T	7.15676489269149	335842	0.323265	0.0197320036001484	0.00268802801679751	7.34069863738134	2.12481762058944e-13	6	31836827	G	T	0.302999	0.0379256	1.35706296962399e-15	7.98930010336026	6	31836827	G	T	0.0134087	0.00187357	8.27751544930571e-13	7.15676489269149	6.33276e-16	4.66411466620622e-13
rs3117116	6	32367017	A	G	7.98635708211632	13239	0.24096	0.124564146006351	0.0141090185623461	8.82868963960293	1.0590915268974e-18	6	32367017	A	G	6.92375370152379	335842	0.151587	0.0249442450687856	0.00350580549030436	7.11512522236938	1.11811273247045e-12	6	32367017	A	G	0.432014	0.054094	1.3896326196366e-15	7.98635708211632	6	32367017	A	G	0.0169983	0.00245507	4.40554863506553e-12	6.92375370152379	6.49599e-16	2.52725526445767e-12
rs9268199	6	32278635	A	G	7.96966837646629	13239	0.24096	0.121720016781905	0.0141090185623461	8.62710728205778	6.29231478804782e-18	6	32278635	A	G	5.63490431030333	335842	0.179824	0.0192083655045873	0.00327374688174401	5.86739482264264	4.42695646677633e-09	6	32278635	A	G	0.383459	0.0481148	1.59110924801754e-15	7.96966837646629	6	32278635	A	G	0.0128757	0.00228499	1.75283081671613e-08	5.63490431030333	7.50308e-16	1.10863570503854e-08
rs630379	6	31922254	C	A	4.74899908434007	13239	0.24096	0.0817704218332756	0.0141090185623461	5.7956137396759	6.80717744191237e-09	6	31922254	C	A	7.91474194012436	335842	0.321654	0.0212761970915335	0.00269154930990946	7.90481415785364	2.68333621745766e-15	6	31922254	C	A	0.176857	0.0372409	2.0444194309269e-06	4.74899908434007	6	31922254	C	A	0.0148551	0.00187689	2.48484898545301e-15	7.91474194012436	8.1676e-16	1.72281437662711e-15
rs2523578	6	31328542	A	G	5.84883384485021	13239	0.24096	0.0969406120654894	0.0141090185623461	6.87082603493078	6.38311978214672e-12	6	31328542	A	G	7.88967566640864	335842	0.295157	0.0218806349718789	0.00275644742797044	7.9379837793567	2.05494204354909e-15	6	31328542	A	G	0.226399	0.0387084	4.95039667135599e-09	5.84883384485021	6	31328542	A	G	0.0151866	0.00192487	3.03878518206118e-15	7.88967566640864	9.21237e-16	1.92872553368856e-15
rs3132946	6	32190028	G	A	7.9375226842319	13239	0.24096	0.123495163453179	0.0141090185623461	8.75292373508957	2.07895188181112e-18	6	32190028	G	A	6.72984905387257	335842	0.145558	0.024687787499021	0.0035650294295143	6.92498841514037	4.36011200754258e-12	6	32190028	G	A	0.441766	0.0556554	2.06252869784657e-15	7.9375226842319	6	32190028	G	A	0.016737	0.00248698	1.7013748158992e-11	6.72984905387257	9.8956e-16	9.93413368534144e-12
rs3130342	6	32080146	C	A	7.91800601313982	13239	0.24096	0.125197133536322	0.0141090185623461	8.87355367654317	7.08480693553252e-19	6	32080146	C	A	7.70249948037869	335842	0.14994	0.0276970709882511	0.00352159095291482	7.8649313218295	3.6929999904915e-15	6	32080146	C	A	0.426638	0.053882	2.41379286937296e-15	7.91800601313982	6	32080146	C	A	0.0188997	0.00245371	1.33813521515402e-14	7.70249948037869	1.17e-15	7.27711052697366e-15
rs9267992	6	32220397	A	G	7.83991532322529	13239	0.24096	0.121410853665076	0.0141090185623461	8.60519483538669	7.61872352991654e-18	6	32220397	A	G	6.36808393826633	335842	0.149774	0.0231471065816394	0.00352319797762692	6.56991367746821	5.03444395031099e-11	6	32220397	A	G	0.426638	0.0544187	4.5081670454146e-15	7.83991532322529	6	32220397	A	G	0.0156588	0.00245895	1.91672584990628e-10	6.36808393826633	2.27758e-15	1.15729446831684e-10
rs3130287	6	32050544	T	C	7.83821423850246	13239	0.24096	0.123815478240066	0.0141090185623461	8.77562657479967	1.69954909564039e-18	6	32050544	T	C	7.56568804196203	335842	0.150352	0.0271855775508305	0.00351761519491542	7.72841145049812	1.08896890468832e-14	6	32050544	T	C	0.420985	0.0537093	4.56982953285961e-15	7.83821423850246	6	32050544	T	C	0.0185491	0.00245174	3.86812054633053e-14	7.56568804196203	2.31071e-15	2.13868143252341e-14
rs3134603	6	32126002	G	A	7.83545337760422	13239	0.24096	0.121151196657729	0.0141090185623461	8.58679121601377	8.94319404661079e-18	6	32126002	G	A	6.2704738023175	335842	0.142975	0.0232569223371282	0.00359166361496773	6.47525070004006	9.46546486635286e-11	6	32126002	G	A	0.428785	0.0547237	4.67196951171879e-15	7.83545337760422	6	32126002	G	A	0.0157039	0.00250442	3.60371137000337e-10	6.2704738023175	2.36547e-15	2.19255405959299e-10
rs3134954	6	32071893	T	C	7.81094870766447	13239	0.24096	0.123513507242467	0.0141090185623461	8.75422	2.05512783857447e-18	6	32071893	T	C	7.60285984632201	335842	0.150287	0.027311926398655	0.00351824123303361	7.76294875468367	8.29771463581959e-15	6	32071893	T	C	0.418702	0.0536045	5.67544605408547e-15	7.81094870766447	6	32071893	T	C	0.0186413	0.00245188	2.90335405551531e-14	7.60285984632201	2.91111e-15	1.60476230597136e-14
rs1964995	6	32449411	C	T	7.80681755502032	13239	0.24096	0.120900821811235	0.0141090185623461	8.56904548512625	1.04346317511972e-17	6	32449411	C	T	6.34244679700002	335842	0.521874	0.016469136905764	0.00251691438192468	6.54338384493241	6.01422006643583e-11	6	32449411	C	T	0.254763	0.0326334	5.86408153276476e-15	7.80681755502032	6	32449411	C	T	0.0111374	0.00175601	2.264800749083e-10	6.34244679700002	3.01459e-15	1.37290274178993e-10
rs9378264	6	32443451	A	G	7.78435703192249	13239	0.24096	0.120543757814825	0.0141090185623461	8.54373798447826	1.29948496213372e-17	6	32443451	A	G	6.31964817736965	335842	0.52175	0.0164104950087905	0.00251688710028091	6.52015539630639	7.02345892480366e-11	6	32443451	A	G	0.254118	0.0326447	7.00648182865411e-15	7.78435703192249	6	32443451	A	G	0.0110937	0.00175543	2.6254273189937e-10	6.31964817736965	3.64385e-15	1.59654256836961e-10
rs605203	6	31847012	A	C	5.98237263939194	13239	0.24096	0.0984347200612556	0.0141090185623461	6.97672340753426	3.02143714877053e-12	6	31847012	A	C	7.71508610035429	335842	0.366374	0.0202909743048969	0.00260941788818815	7.77605396082647	7.48218014259803e-15	6	31847012	A	C	0.214556	0.0358647	2.19917606416774e-09	5.98237263939194	6	31847012	A	C	0.0140457	0.00182055	1.2122717925365e-14	7.71508610035429	4.0211e-15	7.68548269664939e-15
rs3135365	6	32389255	A	C	5.76281405609386	13239	0.24096	0.095392829959677	0.0141090185623461	6.76112442110322	1.36924869851223e-11	6	32389255	A	C	7.71343918996663	335842	0.229246	0.0232189812237625	0.00299098115113732	7.76299817701407	8.29448052635684e-15	6	32389255	A	C	0.243729	0.0422934	8.27256141461797e-09	5.76281405609386	6	32389255	A	C	0.016089	0.00208584	1.22800461798879e-14	7.71343918996663	4.15374e-15	7.92315353668168e-15
rs3132940	6	32161396	G	T	7.75400862901668	13239	0.24096	0.121624489021614	0.0141090185623461	8.62033659422652	6.67575860381545e-18	6	32161396	G	T	7.05983008977526	335842	0.144954	0.0258362464518797	0.00357118715785351	7.23463803767955	4.66772366994388e-13	6	32161396	G	T	0.421442	0.0543515	8.90430443593742e-15	7.75400862901668	6	32161396	G	T	0.0175758	0.00248955	1.67032122581504e-12	7.05983008977526	4.70363e-15	9.64554053251102e-13
rs535586	6	31860337	C	T	6.01011087910493	13239	0.24096	0.0987721932572292	0.0141090185623461	7.00064237783558	2.54791555127259e-12	6	31860337	C	T	7.6921978571154	335842	0.366121	0.0202399244872163	0.00260979834328063	7.75535954313382	8.8093531105721e-15	6	31860337	C	T	0.215299	0.0358228	1.85383040149281e-09	6.01011087910493	6	31860337	C	T	0.0140068	0.00182091	1.45010683642197e-14	7.6921978571154	4.86218e-15	9.18498397631516e-15
rs589428	6	31848220	G	T	6.01795780251443	13239	0.24096	0.0988175637200488	0.0141090185623461	7.0038580843441	2.49008348531141e-12	6	31848220	G	T	7.66101397065284	335842	0.366097	0.0201625406045903	0.00260983447990606	7.72560128231429	1.11326583229562e-14	6	31848220	G	T	0.215547	0.0358173	1.76624115500878e-09	6.01795780251443	6	31848220	G	T	0.0139504	0.00182096	1.84926861897808e-14	7.66101397065284	6.30849e-15	1.17278128787102e-14
rs659445	6	31864304	A	G	6.01568826758857	13239	0.24096	0.0987655456917554	0.0141090185623461	7.00017122065024	2.55649885608902e-12	6	31864304	A	G	7.65084928255949	335842	0.366469	0.0201322527424943	0.00260927525829448	7.71564927023202	1.20367893698058e-14	6	31864304	A	G	0.215423	0.0358102	1.79105944393464e-09	6.01568826758857	6	31864304	A	G	0.0139273	0.00182036	2.00216562158904e-14	7.65084928255949	6.86861e-15	1.27025229018716e-14
rs6920338	6	32288089	T	C	7.66819340336885	13239	0.24096	0.118789489078051	0.0141090185623461	8.41940128954638	3.78413140422165e-17	6	32288089	T	C	6.24732431008365	335842	0.15417	0.022435968013862	0.00348161684207959	6.44412324259693	1.16270578218353e-10	6	32288089	T	C	0.407668	0.0531635	1.74461659813301e-14	7.66819340336885	6	32288089	T	C	0.0151765	0.00242928	4.17974705067595e-10	6.24732431008365	9.62991e-15	2.5755891632497e-10
rs486416	6	31856070	A	G	6.01446220422978	13239	0.24096	0.0985614292567799	0.0141090185623461	6.98570413110227	2.83430822902562e-12	6	31856070	A	G	7.55854514691907	335842	0.367222	0.0198904974246067	0.00260814913903854	7.62628836169203	2.41609061136127e-14	6	31856070	A	G	0.215423	0.0358175	1.80472070130814e-09	6.01446220422978	6	31856070	A	G	0.0137595	0.00182039	4.08601540813823e-14	7.55854514691907	1.47718e-14	2.60653799751676e-14
rs17425622	6	32571961	C	T	4.88982375640755	13239	0.24096	0.0829989269974989	0.0141090185623461	5.88268607279353	4.03661120228376e-09	6	32571961	C	T	7.55942187514009	335842	0.807072	0.0241142656776448	0.00318616807536269	7.56842235163625	3.77784021693578e-14	6	32571961	C	T	0.203757	0.0416696	1.00925288607668e-06	4.88982375640755	6	32571961	C	T	0.0168625	0.00223066	4.05788747591729e-14	7.55942187514009	1.61004e-14	2.82606273358031e-14
rs1044506	6	32172065	G	T	7.60039455118875	13239	0.24096	0.119552735301486	0.0141090185623461	8.47349762658513	2.38132694904456e-17	6	32172065	G	T	7.08654611531442	335842	0.145324	0.0258725123824463	0.00356741001433733	7.25246391036224	4.09257315421485e-13	6	32172065	G	T	0.409925	0.0539347	2.95256862172897e-14	7.60039455118875	6	32172065	G	T	0.0176275	0.00248746	1.37752661960517e-12	7.08654611531442	1.68675e-14	8.0305923300817e-13
rs2857609	6	31577825	G	A	7.59504050906944	13239	0.24096	0.118006136336481	0.0141090185623461	8.36387986981701	6.06887146244533e-17	6	31577825	G	A	6.36028827744196	335842	0.15976	0.0224750526589139	0.00343152171059929	6.5495877789416	5.76961200997981e-11	6	31577825	G	A	0.393635	0.0518279	3.07680519375975e-14	7.59504050906944	6	31577825	G	A	0.0152147	0.00239214	2.01646180410866e-10	6.36028827744196	1.76272e-14	1.23821878742304e-10
rs9271366	6	32586854	A	G	7.58093781229239	13239	0.24096	0.11847329404401	0.0141090185623461	8.39699044412552	4.58067309465798e-17	6	32586854	A	G	6.68695829094608	335842	0.149871	0.0241798779843973	0.00352225857345098	6.86487873623279	6.65477582647961e-12	6	32586854	A	G	0.407367	0.0537357	3.4308363277495e-14	7.58093781229239	6	32586854	A	G	0.0164332	0.0024575	2.2824433121735e-11	6.68695829094608	1.97931e-14	1.37055122536491e-11
rs3117578	6	31636031	G	A	7.57810978441625	13239	0.24096	0.118368542996138	0.0141090185623461	8.38956604054923	4.8793992403837e-17	6	31636031	G	A	6.65459711228768	335842	0.150594	0.0240214566726847	0.00351528836256636	6.83342423013843	8.29112975736988e-12	6	31636031	G	A	0.404665	0.0533992	3.50590383932613e-14	7.57810978441625	6	31636031	G	A	0.0163017	0.00244969	2.84511614423328e-11	6.65459711228768	2.0258e-14	1.71293561853395e-11
rs3130050	6	31618761	A	G	7.56554700694314	13239	0.24096	0.118319624419709	0.0141090185623461	8.38609885562689	5.02540796566936e-17	6	31618761	A	G	6.71622030255233	335842	0.15117	0.0241907172422227	0.00350977508257469	6.89238389158457	5.48650696134374e-12	6	31618761	A	G	0.403168	0.05329	3.86278023011496e-14	7.56554700694314	6	31618761	A	G	0.0164358	0.00244718	1.86766938564439e-11	6.71622030255233	2.24562e-14	1.12068610622753e-11
rs2857600	6	31582287	C	T	7.52242372269528	13239	0.24096	0.117204046676539	0.0141090185623461	8.30703044004283	9.8126781334613e-17	6	31582287	C	T	6.46035160356456	335842	0.147131	0.0235758464262018	0.00354918955895312	6.64259996108965	3.08197503130389e-11	6	31582287	C	T	0.410528	0.0545739	5.37774245963443e-14	7.52242372269528	6	31582287	C	T	0.015978	0.00247324	1.04585144310959e-10	6.46035160356456	3.19414e-14	6.40919229809828e-11
rs3129931	6	32335516	T	C	4.78257606272658	13239	0.24096	0.0812692801585512	0.0141090185623461	5.76009449554777	8.40668590752461e-09	6	32335516	T	C	7.43838383838384	335842	0.246779	0.021712725647364	0.00291613176218173	7.44572859462272	9.64108311454715e-14	6	32335516	T	C	0.191161	0.0399703	1.73077255524446e-06	4.78257606272658	6	32335516	T	C	0.0150962	0.0020295	1.02164496735586e-13	7.43838383838384	4.36584e-14	7.21098931533905e-14
rs3135377	6	32385399	G	A	5.66460438660033	13239	0.24096	0.0934155274070177	0.0141090185623461	6.62097983599818	3.56825648572372e-11	6	32385399	G	A	7.40856268225804	335842	0.234958	0.0221306362687887	0.00296540964434491	7.46292719152385	8.46211128752803e-14	6	32385399	G	A	0.238511	0.0421055	1.47363524494056e-08	5.66460438660033	6	32385399	G	A	0.0153195	0.00206781	1.2796759265078e-13	7.40856268225804	5.1718e-14	8.45469678980756e-14
rs7192	6	32411646	G	T	5.05448385189804	13239	0.24096	0.0849518646909201	0.0141090185623461	6.02110375824708	1.7323165966727e-09	6	32411646	G	T	7.39870675213866	335842	0.397136	0.0190694059640879	0.00256946761976567	7.42153970627856	1.15766535871487e-13	6	32411646	G	T	0.171857	0.0340009	4.31598572900891e-07	5.05448385189804	6	32411646	G	T	0.0132499	0.00179084	1.37847851001647e-13	7.39870675213866	5.88493e-14	9.54534317660197e-14
rs2894249	6	32325835	T	C	4.78567514892531	13239	0.24096	0.0812318859763407	0.0141090185623461	5.75744412110497	8.53970236407298e-09	6	32325835	T	C	7.39878691517239	335842	0.245865	0.0216284853459695	0.00291977610353774	7.40758351976487	1.28621482625427e-13	6	32325835	T	C	0.191282	0.0399697	1.7041977987174e-06	4.78567514892531	6	32325835	T	C	0.0150771	0.00203778	1.37752661960517e-13	7.39878691517239	6.01094e-14	9.73720209475248e-14
rs2213585	6	32413150	A	G	5.05619959603325	13239	0.24096	0.0849674874300277	0.0141090185623461	6.02221104569153	1.72050347838729e-09	6	32413150	A	G	7.39470084038306	335842	0.397147	0.0190595883342865	0.0025694554770917	7.41775387984521	1.19123197718417e-13	6	32413150	A	G	0.171975	0.0340127	4.27690890299395e-07	5.05619959603325	6	32413150	A	G	0.0132428	0.00179085	1.42036512404801e-13	7.39470084038306	6.07723e-14	9.83803937517193e-14
rs7194	6	32412480	A	G	5.05630365753264	13239	0.24096	0.0849492278021594	0.0141090185623461	6.02091686439979	1.73431825793359e-09	6	32412480	A	G	7.38498464973486	335842	0.397427	0.0190331641807239	0.00256914688585713	7.40835967203718	1.27871118746373e-13	6	32412480	A	G	0.171975	0.034012	4.274349203143e-07	5.05630365753264	6	32412480	A	G	0.0132302	0.0017915	1.52826969040979e-13	7.38498464973486	6.57185e-14	1.05883766151307e-13
rs2227139	6	32413459	A	G	5.05152730094531	13239	0.24096	0.084880266330685	0.0141090185623461	6.01602910617836	1.78747445875783e-09	6	32413459	A	G	7.3835741886489	335842	0.397219	0.0190307151575309	0.00256937603408612	7.40674580328596	1.29436220870088e-13	6	32413459	A	G	0.171857	0.0340208	4.38308608097123e-07	5.05152730094531	6	32413459	A	G	0.0132228	0.00179084	1.54454298740142e-13	7.3835741886489	6.64945e-14	1.0705780116221e-13
rs2395165	6	32388144	T	C	5.65171678046998	13239	0.24096	0.0931726568619592	0.0141090185623461	6.60376598487272	4.00842106365732e-11	6	32388144	T	C	7.37674337685936	335842	0.234823	0.0220417469910532	0.00296600025050083	7.43147172267815	1.07395963319178e-13	6	32388144	T	C	0.23813	0.0421341	1.58847359500096e-08	5.65171678046998	6	32388144	T	C	0.0152644	0.00206926	1.62554875575049e-13	7.37674337685936	6.69156e-14	1.07694524978022e-13
rs7195	6	32412539	G	A	5.05625905922269	13239	0.24096	0.0849363998323803	0.0141090185623461	6.02000766084871	1.74408816045993e-09	6	32412539	G	A	7.37896214124764	335842	0.39605	0.0190294917469244	0.00257067368277259	7.40253104641432	1.33612941549667e-13	6	32412539	G	A	0.171975	0.0340123	4.27562886151586e-07	5.05625905922269	6	32412539	G	A	0.0131972	0.00178849	1.59882157450809e-13	7.37896214124764	6.89816e-14	1.10815023870772e-13
rs2213586	6	32413094	G	A	5.05603607947363	13239	0.24096	0.0849245927867274	0.0141090185623461	6.01917081698173	1.75312790075048e-09	6	32413094	G	A	7.37466075477177	335842	0.397282	0.019008650241773	0.00256930657313021	7.39835815646343	1.37878561179738e-13	6	32413094	G	A	0.171975	0.0340138	4.28055419586204e-07	5.05603607947363	6	32413094	G	A	0.0132061	0.00179074	1.65158146375724e-13	7.37466075477177	7.14103e-14	1.14476159524928e-13
rs3132958	6	32297901	G	A	4.89934731546587	13239	0.24096	0.0827236012756187	0.0141090185623461	5.8631719073919	4.54107646767218e-09	6	32297901	G	A	7.35862204338012	335842	0.245911	0.0215310036833602	0.00291959204935869	7.37466170593582	1.64762884592355e-13	6	32297901	G	A	0.194192	0.0396363	9.61590136697607e-07	4.89934731546587	6	32297901	G	A	0.0149954	0.0020378	1.86251594743791e-13	7.35862204338012	8.22596e-14	1.30743183217121e-13
rs3129941	6	32337686	G	A	4.78380880880881	13239	0.24096	0.0811231990345922	0.0141090185623461	5.74974075454775	8.93803934795853e-09	6	32337686	G	A	7.3579202528043	335842	0.245833	0.0215137104738268	0.00291990418141458	7.36795084262123	1.73270650262352e-13	6	32337686	G	A	0.191161	0.03996	1.72016457666693e-06	4.78380880880881	6	32337686	G	A	0.014995	0.00203794	1.8724058959868e-13	7.3579202528043	8.34994e-14	1.32593542606014e-13
rs3132959	6	32298942	A	G	4.8967776262006	13239	0.24096	0.0826790958478171	0.0141090185623461	5.86001751166941	4.62818361962664e-09	6	32298942	A	G	7.35421145106354	335842	0.245978	0.0215161794907463	0.0029193240922871	7.37026065300267	1.70294747963601e-13	6	32298942	A	G	0.194192	0.0396571	9.7422663757881e-07	4.8967776262006	6	32298942	A	G	0.0149845	0.00203754	1.92530704507768e-13	7.35421145106354	8.52378e-14	1.35185333308685e-13
rs6904320	6	32312082	G	A	4.83800778571141	13239	0.24096	0.0818438584626657	0.0141090185623461	5.80081868210798	6.59919278071754e-09	6	32312082	G	A	7.3434099690595	335842	0.250072	0.0213582522800207	0.00290322125537659	7.35674287327104	1.88451847955777e-13	6	32312082	G	A	0.191887	0.0396624	1.31144475340681e-06	4.83800778571141	6	32312082	G	A	0.0148812	0.00202647	2.08737270391055e-13	7.3434099690595	9.33808e-14	1.47284226446321e-13
rs3129907	6	32323745	A	G	4.9318744230807	13239	0.24096	0.0831316102337029	0.0141090185623461	5.89209021636437	3.81340872377522e-09	6	32323745	A	G	7.33783532315407	335842	0.245788	0.0214808715197653	0.00292008434673923	7.3562503575461	1.89148116526101e-13	6	32323745	A	G	0.200893	0.0407336	8.14441696715644e-07	4.9318744230807	6	32323745	A	G	0.0149843	0.00204206	2.17620598318573e-13	7.33783532315407	9.69035e-14	1.52498325168972e-13
rs3117111	6	32338400	T	C	4.77999019176108	13239	0.24096	0.081028732565441	0.0141090185623461	5.74304528747938	9.29888440437746e-09	6	32338400	T	C	7.33739308794881	335842	0.245925	0.0214524387309548	0.00291953604638995	7.34789308646526	2.01355449031071e-13	6	32338400	T	C	0.191039	0.0399664	1.7529519021615e-06	4.77999019176108	6	32338400	T	C	0.0149528	0.00203789	2.18222737756592e-13	7.33739308794881	9.84438e-14	1.54774646413015e-13
rs910049	6	32315727	C	T	4.83135813486812	13239	0.24096	0.0817313542649046	0.0141090185623461	5.7928447612244	6.92040697775479e-09	6	32315727	C	T	7.33331030875953	335842	0.249913	0.0213334005647692	0.00290383683433998	7.34662509700487	2.03273976169171e-13	6	32315727	C	T	0.191645	0.0396669	1.35609464184308e-06	4.83135813486812	6	32315727	C	T	0.0148633	0.00202682	2.2506087344336e-13	7.33331030875953	1.0129e-13	1.58974500178714e-13
rs3131294	6	32180146	G	A	7.37570565235518	13239	0.24096	0.116451984163046	0.0141090185623461	8.25372676692273	1.53530141265272e-16	6	32180146	G	A	7.09088645118273	335842	0.145303	0.0258471947219075	0.00356762396675429	7.24493247123866	4.32654717451189e-13	6	32180146	G	A	0.392746	0.0532486	1.63455673719756e-13	7.37570565235518	6	32180146	G	A	0.0176534	0.00248959	1.33505758956237e-12	7.09088645118273	1.04346e-13	7.90986288624083e-13
rs9267659	6	31846234	G	A	7.32811947882328	13239	0.24096	0.113016177245888	0.0141090185623461	8.01020827540077	1.14514342892625e-15	6	31846234	G	A	5.72111238353763	335842	0.218475	0.0180041983989936	0.00304263699535424	5.91730082375384	3.27267802531643e-09	6	31846234	G	A	0.327671	0.0447142	2.33399542271947e-13	7.32811947882328	6	31846234	G	A	0.0121398	0.00212193	1.05900985107168e-08	5.72111238353763	1.52429e-13	6.91692532880593e-09
rs35464393	6	32530198	C	T	7.26065282965203	13239	0.24096	0.111382713860435	0.0141090185623461	7.89443385932532	2.91636001983601e-15	6	32530198	C	T	5.37597750784953	335842	0.165748	0.0188657973259283	0.00338103507763748	5.57988807945491	2.40673395719741e-08	6	32530198	C	T	0.388018	0.0534412	3.85212170598102e-13	7.26065282965203	6	32530198	C	T	0.012773	0.00237594	7.62219403097149e-08	5.37597750784953	2.59787e-13	5.11590056795716e-08
rs9267576	6	31812038	G	T	7.23546306514102	13239	0.24096	0.113877713550427	0.0141090185623461	8.07127108432205	6.95700592043266e-16	6	31812038	G	T	6.77848387827043	335842	0.147124	0.0246154848351323	0.00354925942583438	6.93538619802231	4.0511290422461e-12	6	31812038	G	T	0.392746	0.0542807	4.63980789982125e-13	7.23546306514102	6	31812038	G	T	0.0167678	0.00247368	1.21646607006486e-11	6.77848387827043	3.16612e-13	7.43672413320303e-12
rs9270986	6	32574060	C	A	7.21482043134989	13239	0.24096	0.112485554841868	0.0141090185623461	7.97259953587897	1.5537100743258e-15	6	32574060	C	A	6.23275426849959	335842	0.15601	0.0221967212124613	0.00346479532086488	6.40635857442817	1.4903622366287e-10	6	32574060	C	A	0.359679	0.0498528	5.40007759066593e-13	7.21482043134989	6	32574060	C	A	0.0150617	0.00241654	4.58849222343717e-10	6.23275426849959	3.72141e-13	2.91462619065025e-10
rs9271055	6	32575369	T	G	7.20559583121811	13239	0.24096	0.112350549320611	0.0141090185623461	7.96303079651834	1.67875656873113e-15	6	32575369	T	G	6.22913263723767	335842	0.155706	0.0222005596863361	0.00346755156123268	6.40237334450596	1.52980021988124e-10	6	32575369	T	G	0.359106	0.0498371	5.7782988562822e-13	7.20559583121811	6	32575369	T	G	0.0150636	0.00241825	4.69537193737799e-10	6.22913263723767	3.9995e-13	2.98530868532413e-10
rs9267658	6	31845985	C	T	7.17976830362655	13239	0.24096	0.113529003184597	0.0141090185623461	8.04655566104231	8.51566664463917e-16	6	31845985	C	T	6.98665426456909	335842	0.147371	0.0253023805973267	0.00354679745264264	7.13386680101354	9.75877724484947e-13	6	31845985	C	T	0.389641	0.0542693	6.9823240407717e-13	7.17976830362655	6	31845985	C	T	0.0172759	0.0024727	2.82097995366343e-12	6.98665426456909	4.89129e-13	1.70700906643279e-12
rs3130683	6	31888367	T	C	7.14480227216578	13239	0.24096	0.112648183522845	0.0141090185623461	7.98412611232069	1.41521281291836e-15	6	31888367	T	C	6.79089194505379	335842	0.1485	0.0245466709968771	0.00353563073168937	6.94265687218655	3.84793270272784e-12	6	31888367	T	C	0.384634	0.0538341	9.01363567078142e-13	7.14480227216578	6	31888367	T	C	0.0167788	0.00247078	1.11609201238692e-11	6.79089194505379	6.41619e-13	6.86236814198347e-12
rs17426593	6	32608077	C	T	4.70634049548751	13239	0.24096	0.0794560375905791	0.0141090185623461	5.63157793289958	1.78568252054465e-08	6	32608077	C	T	7.06443398886304	335842	0.800711	0.0222830706156786	0.0031473344229846	7.07998185796463	1.44173334884228e-12	6	32608077	C	T	0.196389	0.0417286	2.52208663072146e-06	4.70634049548751	6	32608077	C	T	0.0160357	0.00226992	1.615846120949e-12	7.06443398886304	8.43486e-13	1.16562961527806e-12
rs7754768	6	32420179	T	C	5.09541462369686	13239	0.24096	0.0847815430103173	0.0141090185623461	6.00903192774731	1.86634372064115e-09	6	32420179	T	C	7.03531826599139	335842	0.402985	0.0181273972677303	0.0025632170965034	7.07212716880624	1.52576494428039e-12	6	32420179	T	C	0.171263	0.0336112	3.47984580174699e-07	5.09541462369686	6	32420179	T	C	0.0126132	0.00179284	1.99159028905762e-12	7.03531826599139	1.02377e-12	1.39854422926692e-12
rs2857700	6	31572481	C	T	7.05710991612614	13239	0.24096	0.110261010197663	0.0141090185623461	7.81493125906895	5.49930332849915e-15	6	31572481	C	T	6.21207306474523	335842	0.142385	0.0229475681090885	0.00359785908093755	6.37811753958654	1.79277902868133e-10	6	31572481	C	T	0.400925	0.0568115	1.69980851320349e-12	7.05710991612614	6	31572481	C	T	0.0162255	0.00261193	5.23516048967574e-10	6.21207306474523	1.25991e-12	3.36422303753334e-10
rs9268103	6	32245370	G	A	7.02443344318462	13239	0.24096	0.110086761355292	0.0141090185623461	7.80258108449083	6.06536322836818e-15	6	32245370	G	A	6.34917292328321	335842	0.171557	0.0217072183607764	0.0033349314793274	6.50904478707742	7.56301734805775e-11	6	32245370	G	A	0.338695	0.0482167	2.14931465541918e-12	7.02443344318462	6	32245370	G	A	0.0147737	0.00232687	2.16760428065509e-10	6.34917292328321	1.61669e-12	1.38335832149358e-10
rs2395175	6	32405026	A	G	4.65961959980202	13239	0.24096	0.0786330320239015	0.0141090185623461	5.57324605368058	2.5003602823923e-08	6	32405026	A	G	6.97742221597745	335842	0.81459	0.022624166078591	0.00323508978969372	6.99336573305218	2.6836869481321e-12	6	32405026	A	G	0.197703	0.042429	3.16810815932805e-06	4.65961959980202	6	32405026	A	G	0.0158908	0.00227746	3.01161880307882e-12	6.97742221597745	1.64778e-12	2.1882300677305e-12
rs9268148	6	32259527	A	G	7.02156462754269	13239	0.24096	0.109978011248932	0.0141090185623461	7.79487324103743	6.44731673104019e-15	6	32259527	A	G	6.31511776308156	335842	0.171523	0.0215985445725653	0.00333519355604233	6.47594935935141	9.421764539541e-11	6	32259527	A	G	0.338695	0.0482364	2.19381499189791e-12	7.02156462754269	6	32259527	A	G	0.0146961	0.00232713	2.70265120038269e-10	6.31511776308156	1.65238e-12	1.72925391596276e-10
rs2856717	6	32670308	G	A	6.87306183036698	13239	0.24096	0.109161689981031	0.0141090185623461	7.7370151225373	1.0177795716294e-14	6	32670308	G	A	6.92614145031334	335842	0.404543	0.0180832862007624	0.00256162117864682	7.05931320036751	1.67327545830851e-12	6	32670308	G	A	0.233825	0.0340205	6.28347656984477e-12	6.87306183036698	6	32670308	G	A	0.0123784	0.0017872	4.33211523087222e-12	6.92614145031334	2.05335e-12	2.69149509063841e-12
rs2647046	6	32668336	C	A	6.89948262033264	13239	0.24096	0.10948914153572	0.0141090185623461	7.76022379245588	8.47796507215992e-15	6	32668336	C	A	6.90730299369043	335842	0.404454	0.0180407713627869	0.00256171156918986	7.04246784835822	1.88864424708505e-12	6	32668336	C	A	0.234837	0.0340369	5.22035455103311e-12	6.89948262033264	6	32668336	C	A	0.0123486	0.00178776	4.94880110920286e-12	6.90730299369043	2.36317e-12	3.07195442633965e-12
rs2856725	6	32666738	T	C	6.97208975290591	13239	0.24096	0.110326098138598	0.0141090185623461	7.81954447441402	5.30148293886229e-15	6	32666738	T	C	6.82450240334846	335842	0.406589	0.0178303557404061	0.00255956901637778	6.96615548411314	3.25719155341742e-12	6	32666738	T	C	0.236989	0.0339911	3.12248240622327e-12	6.97208975290591	6	32666738	T	C	0.012196	0.00178709	8.83893621739408e-12	6.82450240334846	2.40466e-12	5.48774796947816e-12
rs2858324	6	32660375	G	A	6.96040947394136	13239	0.24096	0.110319767412165	0.0141090185623461	7.81909577371909	5.32041208254517e-15	6	32660375	G	A	6.90110676755644	335842	0.406786	0.0180171083987723	0.00255937402650826	7.03965431084451	1.92717350179369e-12	6	32660375	G	A	0.236482	0.0339753	3.39312610162932e-12	6.96040947394136	6	32660375	G	A	0.0123398	0.00178809	5.16892225431757e-12	6.90110676755644	2.46495e-12	3.19628622152553e-12
rs3117119	6	32318610	A	G	6.96514192362671	13239	0.24096	0.109665295639075	0.0141090185623461	7.7727090055539	7.68250941049236e-15	6	32318610	A	G	6.54601	335842	0.1669	0.0225779958706822	0.00337167509124353	6.69637354124625	2.13655170012211e-11	6	32318610	A	G	0.341083	0.04897	3.28095293113119e-12	6.96514192362671	6	32318610	A	G	0.0154061	0.00235351	5.91697861958719e-11	6.54601	2.53422e-12	3.74360570301662e-11
rs2647003	6	32664880	G	T	6.95544314078626	13239	0.24096	0.110056159111627	0.0141090185623461	7.80041209991337	6.17053357232343e-15	6	32664880	G	T	6.80499062858422	335842	0.406076	0.0177833586690279	0.00256007892421114	6.94641032385657	3.7469792142327e-12	6	32664880	G	T	0.236355	0.0339813	3.513985782354e-12	6.95544314078626	6	32664880	G	T	0.0121629	0.00178735	1.01227846999511e-11	6.80499062858422	2.7266e-12	6.30072105549371e-12
rs2647012	6	32664458	C	T	6.95515659438479	13239	0.24096	0.110152466124891	0.0141090185623461	7.80723801858646	5.84548146948927e-15	6	32664458	C	T	6.85444642847147	335842	0.406475	0.0179030304355801	0.00255968206159659	6.99423991134789	2.66700843242589e-12	6	32664458	C	T	0.236355	0.0339827	3.52127545919222e-12	6.95515659438479	6	32664458	C	T	0.0122454	0.00178649	7.17133482657722e-12	6.85444642847147	2.7325e-12	4.44950239569045e-12
rs2858305	6	32670464	T	G	6.87263759971313	13239	0.24096	0.109060481252209	0.0141090185623461	7.7298417866759	1.07680326791729e-14	6	32670464	T	G	6.87911965143559	335842	0.404089	0.017969942617799	0.00256208325365705	7.01380120733751	2.3192887172497e-12	6	32670464	T	G	0.233825	0.0340226	6.30231345990852e-12	6.87263759971313	6	32670464	T	G	0.012315	0.0017902	6.03253707926613e-12	6.87911965143559	2.92879e-12	3.75925835219833e-12
rs3132963	6	32320153	A	G	6.94397505019518	13239	0.24096	0.109273307486489	0.0141090185623461	7.74492619763896	9.5637379537697e-15	6	32320153	A	G	6.49715618270093	335842	0.166672	0.022427174634247	0.00337351886001359	6.6480062999134	2.97089593736497e-11	6	32320153	A	G	0.340661	0.0490585	3.812413511043e-12	6.94397505019518	6	32320153	A	G	0.0152958	0.00235423	8.19785061237577e-11	6.49715618270093	2.97262e-12	5.20902502878006e-11
rs8084	6	32411035	C	A	5.68375607446955	13239	0.24096	0.0925344322040448	0.0141090185623461	6.55853075783732	5.43404999781203e-11	6	32411035	C	A	6.84326998177558	335842	0.43822	0.0175272677412826	0.00253392186463904	6.91705138421043	4.61140860582541e-12	6	32411035	C	A	0.189709	0.0333774	1.31774082182454e-08	5.68375607446955	6	32411035	C	A	0.0120911	0.00176686	7.75353943359598e-12	6.84326998177558	4.19259e-12	5.2688336231712e-12
rs3129934	6	32336187	C	T	6.87756584997373	13239	0.24096	0.108355499398219	0.0141090185623461	7.67987503307965	1.59243856064039e-14	6	32336187	C	T	6.49777415298875	335842	0.166669	0.0224176567409289	0.00337354314871059	6.64513710147659	3.02934960853503e-11	6	32336187	C	T	0.335053	0.0487168	6.08835545761395e-12	6.87756584997373	6	32336187	C	T	0.0152968	0.00235416	8.16394367964563e-11	6.49777415298875	4.8887e-12	5.21080884430069e-11
rs2524074	6	31244021	A	G	4.77326008460004	13239	0.24096	0.0798620808497516	0.0141090185623461	5.66035691971417	1.51058488386817e-08	6	31244021	A	G	6.80792298829534	335842	0.335516	0.0182004666278718	0.00266270817284255	6.8353215772955	8.18212769495237e-12	6	31244021	A	G	0.169603	0.0355319	1.81271696801441e-06	4.77326008460004	6	31244021	A	G	0.0126449	0.00185738	9.9197333923908e-12	6.80792298829534	5.8418e-12	7.19968257812707e-12
rs2395163	6	32387809	C	T	5.71286579688007	13239	0.24096	0.0926465539464149	0.0141090185623461	6.56647757156322	5.15194030938057e-11	6	32387809	C	T	6.69987398654271	335842	0.775901	0.0204418042858399	0.00301508345821907	6.77984691604999	1.20303286917363e-11	6	32387809	C	T	0.218412	0.0382316	1.1107849835771e-08	5.71286579688007	6	32387809	C	T	0.0140895	0.00210295	2.08929613085404e-11	6.69987398654271	1.20859e-11	1.4275114989598e-11
rs760293	6	31611777	C	T	5.28155914155191	13239	0.24096	0.086625340936857	0.0141090185623461	6.13971415191423	8.26701060271358e-10	6	31611777	C	T	6.67412647675661	335842	0.181427	0.0219641321908598	0.00326244189573583	6.73242095731053	1.66863040289008e-11	6	31611777	C	T	0.241053	0.0456405	1.28085509453628e-07	5.28155914155191	6	31611777	C	T	0.0151797	0.00227441	2.4905771539521e-11	6.67412647675661	1.50576e-11	1.75588449738179e-11
rs2261033	6	31603591	G	A	6.37041629153803	13239	0.24096	0.101338122835719	0.0141090185623461	7.18250687586225	6.84446180380503e-13	6	31603591	G	A	6.49839083055728	335842	0.570914	0.0168141209791962	0.00254018258477368	6.6192568518433	3.61009110818087e-11	6	31603591	G	A	0.204491	0.0321001	1.88521115125378e-10	6.37041629153803	6	31603591	G	A	0.0115093	0.0017711	8.13017698856441e-11	6.49839083055728	4.93236e-11	5.37018256475094e-11
rs9271348	6	32583742	A	G	4.91211810628694	13239	0.24096	0.0811663461797279	0.0141090185623461	5.75279887974229	8.77778907875623e-09	6	32583742	A	G	6.50339272792105	335842	0.30469	0.0178858785665266	0.00273151830322342	6.54796218843557	5.8327481613171e-11	6	32583742	A	G	0.180204	0.0366856	9.01010806851586e-07	4.91211810628694	6	32583742	A	G	0.0124021	0.00190702	7.86321227458418e-11	6.50339272792105	5.28402e-11	5.7303213790214e-11
rs2523485	6	31351035	C	T	6.1231884057971	13239	0.24096	0.0977373485975354	0.0141090185623461	6.92729605292142	4.28960293020273e-12	6	31351035	C	T	6.40995878543191	335842	0.163036	0.0221936181816369	0.00340351217244001	6.52079882697351	6.99339296874825e-11	6	31351035	C	T	0.307749	0.0502596	9.17212574401365e-10	6.1231884057971	6	31351035	C	T	0.0152416	0.0023778	1.45740414376998e-10	6.40995878543191	9.3757e-11	9.83910142997547e-11
rs2905722	6	31449327	G	A	6.0678906044774	13239	0.24096	0.096941311288906	0.0141090185623461	6.87087559354561	6.38090238258586e-12	6	31449327	G	A	6.39479200324775	335842	0.156581	0.0224988832617087	0.00345964256550133	6.50323923230157	7.86086316664883e-11	6	31449327	G	A	0.311838	0.0513915	1.29601491625784e-09	6.0678906044774	6	31449327	G	A	0.0154369	0.00241398	1.60960754823762e-10	6.39479200324775	1.04678e-10	1.09163054223068e-10
rs2857709	6	31532814	G	A	6.21392708588207	13239	0.24096	0.0988676615111844	0.0141090185623461	7.00740884805698	2.42772076912443e-12	6	31532814	G	A	6.34808387622483	335842	0.152303	0.0226236099951852	0.00349903189311052	6.46567698903527	1.00846290382365e-10	6	31532814	G	A	0.317454	0.0510875	5.1673752410347e-10	6.21392708588207	6	31532814	G	A	0.0155031	0.00244217	2.18293095795566e-10	6.34808387622483	1.43508e-10	1.46993864521092e-10
rs2242656	6	31614102	T	C	5.44690173169205	13239	0.24096	0.0880933006259304	0.0141090185623461	6.24375822008145	4.27180155161768e-10	6	31614102	T	C	6.26955519035383	335842	0.197309	0.0200597470612529	0.00315918318066148	6.34966252797431	2.15787777956306e-10	6	31614102	T	C	0.234963	0.043137	5.12530836604988e-08	5.44690173169205	6	31614102	T	C	0.0138102	0.00220274	3.62526701866522e-10	6.26955519035383	2.60321e-10	2.57803192028593e-10
rs9268644	6	32408044	C	A	6.17382514032697	13239	0.24096	0.0973927337723121	0.0141090185623461	6.9028709078484	5.09619385198976e-12	6	32408044	C	A	5.89435603866381	335842	0.453818	0.0152140152636993	0.00252529955753761	6.02463783684117	1.69488709783179e-09	6	32408044	C	A	0.208871	0.0338317	6.66545805807103e-10	6.17382514032697	6	32408044	C	A	0.0103789	0.00176082	3.76469675779367e-09	5.89435603866381	7.12141e-10	2.6088642881611e-09
rs2596540	6	31367882	G	A	6.16382662267556	13239	0.24096	0.0973457015355919	0.0141090185623461	6.89953742036928	5.21721447161559e-12	6	31367882	G	A	5.93940657866758	335842	0.151084	0.0213012387500004	0.00351059602200574	6.06769865187456	1.29756075000744e-09	6	31367882	G	A	0.326562	0.0529804	7.10149850571272e-10	6.16382662267556	6	31367882	G	A	0.0145247	0.00244548	2.86305703701506e-09	5.93940657866758	7.61451e-10	1.98020175702711e-09
rs9262648	6	31029173	A	C	5.67344242440924	13239	0.24096	0.0908753456790728	0.0141090185623461	6.44094025941671	1.18735605231789e-10	6	31029173	A	C	6.09538486495255	335842	0.774999	0.0186457687215313	0.00301078440529714	6.19299365598087	5.90321060706487e-10	6	31029173	A	C	0.206119	0.0363305	1.39952287067858e-08	5.67344242440924	6	31029173	A	C	0.0127755	0.00209593	1.09299959241713e-09	6.09538486495255	8.32893e-10	7.72835825600978e-10
rs9262638	6	31025989	T	C	5.66267548618416	13239	0.24096	0.0907253170809074	0.0141090185623461	6.43030673466072	1.27346702230093e-10	6	31025989	T	C	6.09488127908364	335842	0.774743	0.0186350911032576	0.00300957017749801	6.19194436554053	5.94265292229509e-10	6	31025989	T	C	0.205631	0.0363134	1.49028729836205e-08	5.66267548618416	6	31025989	T	C	0.0127703	0.00209525	1.09647819614318e-09	6.09488127908364	8.36302e-10	7.75822945779989e-10
rs9262616	6	31022195	T	C	5.87070216739688	13239	0.24096	0.0935940989374977	0.0141090185623461	6.63363638823751	3.27516061247636e-11	6	31022195	T	C	6.08986287252011	335842	0.775028	0.0186615445591085	0.00301092211859378	6.19794993828142	5.72033277062541e-10	6	31022195	T	C	0.217206	0.0369983	4.33940315092653e-09	5.87070216739688	6	31022195	T	C	0.0127635	0.00209586	1.13120157205092e-09	6.08986287252011	8.52769e-10	7.90243361274546e-10
rs9262656	6	31034264	G	A	5.64435982236701	13239	0.24096	0.0904659627038989	0.0141090185623461	6.41192456471301	1.4369393951156e-10	6	31034264	G	A	6.09198253858448	335842	0.775004	0.0186314343670356	0.00301080814658487	6.18818385627431	6.08613198328086e-10	6	31034264	G	A	0.205142	0.0363446	1.65783002160516e-08	5.64435982236701	6	31034264	G	A	0.0127691	0.00209605	1.11632332706879e-09	6.09198253858448	8.53683e-10	7.91042849501995e-10
rs9262639	6	31026009	T	C	5.66657121143701	13239	0.24096	0.0907717441047067	0.0141090185623461	6.4335973266742	1.24618735000455e-10	6	31026009	T	C	6.09118842681833	335842	0.774987	0.0186321131384954	0.00301072743025899	6.18857520984309	6.07104404955905e-10	6	31026009	T	C	0.205794	0.0363172	1.4568673151346e-08	5.66657121143701	6	31026009	T	C	0.0127664	0.00209588	1.12199261916973e-09	6.09118842681833	8.56937e-10	7.93890037197433e-10
rs2394423	6	31032042	A	G	5.64672475986342	13239	0.24096	0.0904887959946941	0.0141090185623461	6.4135429119208	1.42176070705249e-10	6	31032042	A	G	6.08710173001136	335842	0.774996	0.0186173547998989	0.00301077016100127	6.18358552939407	6.26617579284255e-10	6	31032042	A	G	0.205224	0.0363439	1.63527199778183e-08	5.64672475986342	6	31032042	A	G	0.0127582	0.00209594	1.15087988616476e-09	6.08710173001136	8.81781e-10	8.1561100140071e-10
rs9262636	6	31025848	G	A	5.66404453854859	13239	0.24096	0.0907260175925555	0.0141090185623461	6.43035638458109	1.27305111001586e-10	6	31025848	G	A	6.08588196001718	335842	0.774992	0.0186164069551322	0.00301075116916299	6.18330971546471	6.27713871247729e-10	6	31025848	G	A	0.205713	0.0363191	1.47852952007417e-08	5.66404453854859	6	31025848	G	A	0.0127554	0.0020959	1.1599786609815e-09	6.08588196001718	8.87945e-10	8.20994912745945e-10
rs9262651	6	31029455	T	C	5.09192572245299	13239	0.24096	0.0827729641696781	0.0141090185623461	5.86667058406039	4.44632799626926e-09	6	31029455	T	C	6.06847479104223	335842	0.760837	0.0180866247830043	0.0029473359718565	6.13660096972647	8.43057890961757e-10	6	31029455	T	C	0.182405	0.0358224	3.5443777370305e-07	5.09192572245299	6	31029455	T	C	0.0124516	0.00205185	1.29285553773328e-09	6.06847479104223	1.0359e-09	9.49643681871335e-10
rs3906263	6	31031904	A	G	5.88581629814483	13239	0.24096	0.093685602789796	0.0141090185623461	6.64012187494191	3.13423887601196e-11	6	31031904	A	G	6.03182838707243	335842	0.782228	0.0187114160267133	0.00304617433335715	6.14259526180554	8.11839586456555e-10	6	31031904	A	G	0.21793	0.0370263	3.96095583490633e-09	5.88581629814483	6	31031904	A	G	0.0127882	0.00212012	1.62311764868294e-09	6.03182838707243	1.25236e-09	1.13608994612402e-09
rs3130933	6	31132085	C	T	5.9875591392188	13239	0.24096	0.0940517662220214	0.0141090185623461	6.66607431313649	2.62736261496151e-11	6	31132085	C	T	5.51795301742902	335842	0.14674	0.0200777665519613	0.00355310058658153	5.65077347592859	1.59727467369506e-08	6	31132085	C	T	0.318416	0.0531796	2.13010003741125e-09	5.9875591392188	6	31132085	C	T	0.0136896	0.00248092	3.43202150129766e-08	5.51795301742902	2.43557e-09	2.45631539737119e-08
rs4394274	6	31318164	A	C	5.17586983022535	13239	0.24096	0.0836263358012517	0.0141090185623461	5.92715470829644	3.08228562216158e-09	6	31318164	A	C	5.91638685743976	335842	0.599981	0.01538222998114	0.00256633528059012	5.99385049080686	2.04929792426945e-09	6	31318164	A	C	0.168561	0.0325667	2.26855858864991e-07	5.17586983022535	6	31318164	A	C	0.0105898	0.00178991	3.29397273432243e-09	5.91638685743976	2.79299e-09	2.42453526829004e-09
rs4540292	6	31317182	G	T	5.18553497815788	13239	0.24096	0.0837388459725793	0.0141090185623461	5.93512905256641	2.93614454158893e-09	6	31317182	G	T	5.90590640922499	335842	0.599772	0.0153561693217465	0.00256611210421272	5.98421608180587	2.17434502168648e-09	6	31317182	G	T	0.168561	0.032506	2.15412053089001e-07	5.18553497815788	6	31317182	G	T	0.0105711	0.00178992	3.5101849512818e-09	5.90590640922499	2.98712e-09	2.58356302759578e-09
rs3099849	6	31351415	A	G	5.63069649611851	13239	0.24096	0.0895240718023245	0.0141090185623461	6.34516649097369	2.2218502943096e-10	6	31351415	A	G	5.72069194884829	335842	0.182896	0.0189549142993217	0.00325223321648232	5.82827646038979	5.60027482886112e-09	6	31351415	A	G	0.259159	0.0460261	1.79469230203935e-08	5.63069649611851	6	31351415	A	G	0.0129866	0.00227011	1.06176889906273e-08	5.72069194884829	9.44448e-09	7.6763655583598e-09
rs2254556	6	31342631	C	T	5.67109659024435	13239	0.24096	0.0900317854565347	0.0141090185623461	6.3811515350054	1.75761278063712e-10	6	31342631	C	T	5.69534181023298	335842	0.182094	0.0189142707539454	0.00325778889109128	5.80586139441639	6.40359206780157e-09	6	31342631	C	T	0.261754	0.0461558	1.41876347709537e-08	5.67109659024435	6	31342631	C	T	0.0129491	0.00227363	1.23216821061542e-08	5.69534181023298	1.10404e-08	8.89901843670769e-09
rs2523537	6	31335707	G	A	5.66759391047411	13239	0.24096	0.0899407498469002	0.0141090185623461	6.37469923577337	1.83322355802272e-10	6	31335707	G	A	5.67435027950406	335842	0.182093	0.0188475572645879	0.00325779584493148	5.78537089545106	7.23525114354354e-09	6	31335707	G	A	0.262014	0.0462302	1.44817151227851e-08	5.66759391047411	6	31335707	G	A	0.0129016	0.00227367	1.39328512333805e-08	5.67435027950406	1.25869e-08	1.00750287993486e-08
rs2596548	6	31330546	G	T	5.67249184215765	13239	0.24096	0.090001071210336	0.0141090185623461	6.37897461206332	1.78277584932963e-10	6	31330546	G	T	5.67066948183338	335842	0.182127	0.0188354228489281	0.00325755945161142	5.78206572396116	7.37888664809282e-09	6	31330546	G	T	0.262144	0.0462132	1.40731073341812e-08	5.67249184215765	6	31330546	G	T	0.0128917	0.0022734	1.42354106568693e-08	5.67066948183338	1.28745e-08	1.02928807625427e-08

## Sheet: Supplementary Table S7
Supplementary Table S7 Using a combination of MTAG and CPASSOC methods to screen for shared SNPs between PBC and AFPL.
SNP	CHR_PBC	BP_PBC	A1_PBC	A2_PBC	Z_PBC	N_PBC	FRQ_PBC	mtag_beta_PBC	mtag_se_PBC	mtag_z_PBC	mtag_pval_PBC	CHR_AFPL	BP_AFPL	A1_AFPL	A2_AFPL	Z_AFPL	N_AFPL	FRQ_AFPL	mtag_beta_AFPL	mtag_se_AFPL	mtag_z_AFPL	mtag_pval_AFPL	CHR.x	BP.x	effect_allele.x	other_allele.x	beta.x	se.x	pval.x	Z.x	CHR.y	BP.y	effect_allele.y	other_allele.y	beta.y	se.y	pval.y	Z.y	p_Shet	p_Shom
rs2272593	6	31601344	C	T	7.44141548067024	13239	0.24096	0.117090246971346	0.0141634522709002	8.26706968977584	1.37291715228654e-16	6	31601344	C	T	9.53803818285964	454724	0.72192	0.022735708030055	0.0024735707310984	9.19145256054963	3.87571859857034e-20	6	31601344	C	T	0.291289	0.0391443	9.96322641954418e-14	7.44141548067024	6	31601344	C	T	0.016152	0.00169343	1.50003019045595e-21	9.53803818285964	9.12343e-23	1.32619642981502e-21
rs1475865	6	31657413	C	T	7.62301431092939	13239	0.24096	0.119530442354355	0.0141634522709002	8.4393578675687	3.19085748161087e-17	6	31657413	C	T	9.47821266608087	454724	0.723011	0.0226335928560587	0.0024765667282564	9.13910075501724	6.29737773906398e-20	6	31657413	C	T	0.30016	0.0393755	2.47856321539419e-14	7.62301431092939	6	31657413	C	T	0.0160723	0.00169571	2.60015956316527e-21	9.47821266608087	1.7079e-22	2.35256990510587e-21
rs3130617	6	31627523	T	C	7.60435276093916	13239	0.24096	0.119225293271395	0.0141634522709002	8.41781304381221	3.83577258101417e-17	6	31627523	T	C	9.44622158219033	454724	0.722523	0.0225453708478995	0.00247522346900806	9.10842	8.35916756940567e-20	6	31627523	T	C	0.29881	0.0392946	2.86285927087212e-14	7.60435276093916	6	31627523	T	C	0.0160053	0.00169436	3.50025754158434e-21	9.44622158219033	2.38829e-22	3.19653053004259e-21
rs3115667	6	31643399	C	T	7.60123910038886	13239	0.24096	0.119092645234996	0.0141634522709002	8.40844752798583	4.15473205470031e-17	6	31643399	C	T	9.38356933146661	454724	0.721641	0.0223767059018415	0.00247280866554331	9.04910525979778	1.44144576495514e-19	6	31643399	C	T	0.300835	0.0395771	2.93359394121412e-14	7.60123910038886	6	31643399	C	T	0.0158846	0.00169281	6.40029512108372e-21	9.38356933146661	4.58835e-22	5.80704527653187e-21
rs3135365	6	32389255	A	C	5.76281405609386	13239	0.24096	0.0885528777718941	0.0141634522709002	6.25220998935636	4.04684755960525e-10	6	32389255	A	C	5.89660421221598	454724	0.77195	0.0150809568761032	0.00264146051736466	5.70932511652655	1.13425038288363e-08	6	32389255	A	C	0.243729	0.0422934	8.27256141461797e-09	5.76281405609386	6	32389255	A	C	0.0106531	0.00180665	3.69998531172859e-09	5.89660421221598	3.10348e-09	3.54499080861254e-09
rs644045	6	31883957	G	A	5.63780886242451	13239	0.24096	0.0866956834224319	0.0141634522709002	6.12108416537361	9.29407928083346e-10	6	31883957	G	A	5.81334250432301	454724	0.616447	0.0128269594766121	0.0022792564051917	5.62769	1.82633832442308e-08	6	31883957	G	A	0.199305	0.0353515	1.72234441059164e-08	5.63780886242451	6	31883957	G	A	0.00904341	0.00155563	6.10000231740111e-09	5.81334250432301	5.33867e-09	5.85983555146227e-09
rs2395165	6	32388144	T	C	5.65171678046998	13239	0.24096	0.0867318403912408	0.0141634522709002	6.1236370012301	9.14631404502469e-10	6	32388144	T	C	5.70306577480491	454724	0.7669	0.0144792782318857	0.00262127896219934	5.52374563741096	3.31847794377964e-08	6	32388144	T	C	0.23813	0.0421341	1.58847359500096e-08	5.65171678046998	6	32388144	T	C	0.0102313	0.001794	1.19999655704812e-08	5.70306577480491	1.08063e-08	1.12674080808649e-08
rs3135377	6	32385399	G	A	5.66460438660033	13239	0.24096	0.0868906914111651	0.0141634522709002	6.13485255919478	8.52382106110892e-10	6	32385399	G	A	5.68877607943769	454724	0.766752	0.0144414549818604	0.002620700095971	5.51053323654331	3.57748247914529e-08	6	32385399	G	A	0.238511	0.0421055	1.47363524494056e-08	5.66460438660033	6	32385399	G	A	0.0101977	0.0017926	1.29998996537546e-08	5.68877607943769	1.18276e-08	1.22518740287628e-08

## Sheet: Supplementary Table S8
Supplementary Table S8 Using a combination of MTAG and CPASSOC methods to screen for shared SNPs between PBC and AFPR.
SNP	CHR_PBC	BP_PBC	A1_PBC	A2_PBC	Z_PBC	N_PBC	FRQ_PBC	mtag_beta_PBC	mtag_se_PBC	mtag_z_PBC	mtag_pval_PBC	CHR_AFPR	BP_AFPR	A1_AFPR	A2_AFPR	Z_AFPR	N_AFPR	FRQ_AFPR	mtag_beta_AFPR	mtag_se_AFPR	mtag_z_AFPR	mtag_pval_AFPR	CHR.x	BP.x	effect_allele.x	other_allele.x	beta.x	se.x	pval.x	Z.x	CHR.y	BP.y	effect_allele.y	other_allele.y	beta.y	se.y	pval.y	Z.y	p_Shet	p_Shom
rs2272593	6	31601344	C	T	7.44141548067024	13239	0.24096	0.117173642824332	0.0141656004893087	8.27170319484636	1.32058724951443e-16	6	31601344	C	T	9.56326954806207	454789	0.721914	0.0227980059886194	0.00247772969734654	9.20116750952874	3.54081395909633e-20	6	31601344	C	T	0.291289	0.0391443	9.96322641954418e-14	7.44141548067024	6	31601344	C	T	0.0162873	0.00170311	1.10001852750622e-21	9.56326954806207	1.72386e-21	1.03096019265542e-21
rs1475865	6	31657413	C	T	7.62301431092939	13239	0.24096	0.119608249130862	0.0141656004893087	8.44357069233563	3.07788085228015e-17	6	31657413	C	T	9.49906180368242	454789	0.723005	0.0226858474216906	0.00248073061089197	9.14482504552705	5.97264612956653e-20	6	31657413	C	T	0.30016	0.0393755	2.47856321539419e-14	7.62301431092939	6	31657413	C	T	0.0161997	0.0017054	2.09990670376242e-21	9.49906180368242	3.22205e-21	1.91008879154187e-21
rs3130617	6	31627523	T	C	7.60435276093916	13239	0.24096	0.119323690204364	0.0141656004893087	8.42348266806069	3.65455171420093e-17	6	31627523	T	C	9.48158493932067	454789	0.722517	0.0226315576732477	0.0024793851473801	9.12789112137816	6.98465756347211e-20	6	31627523	T	C	0.29881	0.0392946	2.86285927087212e-14	7.60435276093916	6	31627523	T	C	0.016157	0.00170404	2.49976970217851e-21	9.48158493932067	3.82099e-21	2.25975023537019e-21
rs3115667	6	31643399	C	T	7.60123910038886	13239	0.24096	0.119153736222155	0.0141656004893087	8.41148501343696	4.04851913932659e-17	6	31643399	C	T	9.39288567266576	454789	0.721633	0.0224018747347922	0.0024769609154579	9.04409697988752	1.50907271110402e-19	6	31643399	C	T	0.300835	0.0395771	2.93359394121412e-14	7.60123910038886	6	31643399	C	T	0.0159912	0.00170248	5.79962615819643e-21	9.39288567266576	9.02247e-21	5.27236140419331e-21
rs644045	6	31883957	G	A	5.63780886242451	13239	0.24096	0.0869909120112035	0.0141656004893087	6.14099713435084	8.20050635780783e-10	6	31883957	G	A	5.99663803241806	454789	0.616449	0.0132246294688628	0.00228310605046066	5.79238510019911	6.93937994027504e-09	6	31883957	G	A	0.199305	0.0353515	1.72234441059164e-08	5.63780886242451	6	31883957	G	A	0.0093821	0.00156456	2.00000001996811e-09	5.99663803241806	4.43411e-09	1.91767860388756e-09
rs3135365	6	32389255	A	C	5.76281405609386	13239	0.24096	0.0885205314986028	0.0141656004893087	6.24897840126245	4.13146039145287e-10	6	32389255	A	C	5.84999532198502	454789	0.771951	0.0149677404464669	0.00264592340353932	5.65690617742194	1.54125959721641e-08	6	32389255	A	C	0.243729	0.0422934	8.27256141461797e-09	5.76281405609386	6	32389255	A	C	0.0106295	0.00181701	4.90004422793237e-09	5.84999532198502	1.08796e-08	4.67976218527516e-09
rs2395165	6	32388144	T	C	5.65171678046998	13239	0.24096	0.0867727421583982	0.0141656004893087	6.12559575034527	9.03449201367454e-10	6	32388144	T	C	5.70831578247279	454789	0.7669	0.014495384069078	0.00262570369439629	5.52057115203582	3.37899532641357e-08	6	32388144	T	C	0.23813	0.0421341	1.58847359500096e-08	5.65171678046998	6	32388144	T	C	0.0102994	0.00180428	1.09999319893519e-08	5.70831578247279	2.54208e-08	1.08842368016613e-08
rs3135377	6	32385399	G	A	5.66460438660033	13239	0.24096	0.0869226839228738	0.0141656004893087	6.13618067151319	8.45290202949848e-10	6	32385399	G	A	5.68776450881095	454789	0.766752	0.0144420551958733	0.00262512385103882	5.50147574567131	3.76625430341574e-08	6	32385399	G	A	0.238511	0.0421055	1.47363524494056e-08	5.66460438660033	6	32385399	G	A	0.0102543	0.00180287	1.29998996537546e-08	5.68776450881095	2.86955e-08	1.22788149030911e-08

## Sheet: Supplementary Table S9
Supplementary Table S9 Perform multi-marker analysis on the PBC genome using MAGMA.
GENE	CHR	START	STOP	NSNPS	NPARAM	N	ZSTAT	P	SYMBOL
ENSG00000204438	6	31629006	31634060	10	4	13239	8.2392	8.6682e-17	GPANK1
ENSG00000204435	6	31633013	31638120	7	3	13239	8.0676	3.5857e-16	CSNK2B
ENSG00000204422	6	31654739	31681849	21	7	13239	8.0627	3.7313e-16	XXbac-BPG32J3.20
ENSG00000223865	6	33043703	33054978	17	3	13239	7.8235	2.5679e-15	HLA-DPB1
ENSG00000258388	6	32121622	32139755	13	6	13239	7.8196	2.6493e-15	PPT2-EGFL8
ENSG00000204290	6	32361740	32374905	28	6	13239	7.8159	2.7276e-15	BTNL2
ENSG00000204427	6	31654726	31671221	14	4	13239	7.574	1.8095e-14	ABHD16A
ENSG00000081985	1	67773047	67862583	36	7	13239	7.57	1.8667e-14	IL12RB2
ENSG00000151967	3	159557650	159615149	16	5	13239	7.4263	5.5846e-14	SCHIP1
ENSG00000204248	6	33130458	33160276	28	5	13239	7.3985	6.8884e-14	COL11A2
ENSG00000263020	6	31633879	31641323	12	5	13239	7.2885	1.5666e-13	CSNK2B-LY6G5B-1181
ENSG00000179344	6	32627244	32636160	5	2	13239	7.2048	2.9054e-13	HLA-DQB1
ENSG00000142539	19	50919056	50931666	4	2	13239	7.0664	7.9478e-13	CTD-2545M3.6
ENSG00000204390	6	31777396	31783437	9	5	13239	6.9443	1.9021e-12	HSPA1L
ENSG00000204439	6	31626075	31628549	4	2	13239	6.9429	1.9211e-12	C6orf47
ENSG00000168811	3	159706537	159713806	4	2	13239	6.9053	2.5057e-12	IL12A
ENSG00000176142	3	119148347	119187677	11	4	13239	6.9049	2.5118e-12	TMEM39A
ENSG00000241106	6	32780540	32784825	16	5	13239	6.8335	4.1445e-12	HLA-DOB
ENSG00000038532	16	11038345	11276046	132	14	13239	6.7298	8.4973e-12	CLEC16A
ENSG00000138378	2	191894302	192016322	39	11	13239	6.6845	1.1587e-11	STAT4
ENSG00000242107	3	159733811	159749210	4	2	13239	6.6626	1.345e-11	LINC01100
ENSG00000213676	6	32065953	32096030	23	8	13239	6.568	2.5496e-11	ATF6B
ENSG00000204296	6	32256303	32339684	146	12	13239	6.5268	3.3587e-11	C6orf10
ENSG00000138386	2	191511472	191557492	14	4	13239	6.5246	3.4089e-11	NAB1
ENSG00000204463	6	31606805	31620482	19	5	13239	6.4105	7.2523e-11	BAG6
ENSG00000110367	11	118620034	118661858	9	3	13239	6.3892	8.3401e-11	DDX6
ENSG00000250588	3	158680024	159615155	294	42	13239	6.3554	1.0391e-10	IQCJ-SCHIP1
ENSG00000269404	19	50922195	50934570	3	1	13239	6.2648	1.8668e-10	SPIB
ENSG00000204410	6	31707725	31732622	30	7	13239	6.2216	2.4598e-10	MSH5
ENSG00000175643	16	11343476	11445619	66	9	13239	6.1697	3.4215e-10	RMI2
ENSG00000221988	6	32121218	32134011	6	3	13239	6.1163	4.79e-10	PPT2
ENSG00000204227	6	33176272	33180499	3	1	13239	6.1094	5e-10	RING1
ENSG00000204228	6	33172419	33174608	3	2	13239	6.1094	5e-10	HSD17B8
ENSG00000205436	14	103566481	103576896	3	1	13239	6.1094	5e-10	EXOC3L4
ENSG00000226979	6	31539831	31542101	3	2	13239	6.0543	7.0518e-10	LTA
ENSG00000168477	6	32008931	32083111	43	11	13239	6.0253	8.438e-10	TNXB
ENSG00000231389	6	33032346	33048552	25	4	13239	5.9954	1.015e-09	HLA-DPA1
ENSG00000128604	7	128577666	128590089	6	2	13239	5.9882	1.0608e-09	IRF5
ENSG00000100316	22	39708887	39716394	9	4	13239	5.9792	1.1211e-09	RPL3
ENSG00000073605	17	38060848	38076107	11	1	13239	5.9664	1.213e-09	GSDMB
ENSG00000255152	6	31707797	31732628	29	7	13239	5.95	1.3405e-09	MSH5-SAPCD1
ENSG00000250264	6	32781544	32806599	79	14	13239	5.9465	1.3695e-09	TAP2
ENSG00000204424	6	31674640	31685581	9	4	13239	5.8929	1.8974e-09	LY6G6F
ENSG00000250641	6	31674681	31685695	9	4	13239	5.8929	1.8974e-09	MEGT1
ENSG00000204387	6	31802385	31807541	6	4	13239	5.7911	3.4963e-09	C6orf48
ENSG00000109320	4	103422486	103538459	44	5	13239	5.7758	3.8297e-09	NFKB1
ENSG00000204394	6	31745295	31763730	7	3	13239	5.7507	4.445e-09	VARS
ENSG00000064419	7	128594948	128695198	26	4	13239	5.7488	4.4927e-09	TNPO3
ENSG00000204287	6	32407619	32412823	24	4	13239	5.6856	6.5166e-09	HLA-DRA
ENSG00000204469	6	31588497	31605548	25	7	13239	5.6682	7.2165e-09	PRRC2A
ENSG00000109323	4	103552660	103682151	39	5	13239	5.6074	1.027e-08	MANBA
ENSG00000178279	16	11361605	11363390	1	1	13239	5.5951	1.1024e-08	TNP2
ENSG00000172057	17	38077294	38083854	3	1	13239	5.5825	1.1856e-08	ORMDL3
ENSG00000204428	6	31644461	31651817	7	2	13239	5.5441	1.4771e-08	LY6G5C
ENSG00000162302	11	64126620	64139687	5	1	13239	5.5174	1.7203e-08	RPS6KA4
ENSG00000204314	6	32116136	32122150	4	2	13239	5.4853	2.0637e-08	PRRT1
ENSG00000168071	11	64107695	64125006	7	2	13239	5.4089	3.1713e-08	CCDC88B
ENSG00000228727	6	31730576	31732628	3	2	13239	5.3989	3.3521e-08	SAPCD1
ENSG00000204257	6	32916390	32936871	21	6	13239	5.3016	5.7398e-08	HLA-DMA
ENSG00000067182	12	6437923	6451280	6	2	13239	5.2806	6.4379e-08	TNFRSF1A
ENSG00000204371	6	31847536	31865464	13	4	13239	5.2479	7.693e-08	EHMT2
ENSG00000163389	3	119187785	119213555	13	5	13239	5.2313	8.4143e-08	POGLUT1
ENSG00000112511	6	33378176	33384230	4	2	13239	5.1593	1.2391e-07	PHF1
ENSG00000142864	1	67873493	67896098	5	2	13239	5.1567	1.2565e-07	SERBP1
ENSG00000204348	6	31937587	31940069	1	1	13239	5.1565	1.2581e-07	DXO
ENSG00000204472	6	31582961	31584798	4	2	13239	5.0697	1.9922e-07	AIF1
ENSG00000204538	6	31105313	31107127	13	7	13239	5.0262	2.5013e-07	PSORS1C2
ENSG00000154822	3	16844159	17132086	89	13	13239	5.0249	2.5178e-07	PLCL2
ENSG00000161405	17	37921198	38020441	20	4	13239	4.9816	3.1529e-07	IKZF3
ENSG00000204421	6	31686425	31689622	8	3	13239	4.9486	3.7378e-07	LY6G6C
ENSG00000103811	15	79213400	79241916	15	3	13239	4.9276	4.1616e-07	CTSH
ENSG00000204267	6	32789610	32806557	51	10	13239	4.9163	4.4098e-07	TAP2
ENSG00000204385	6	31830969	31846823	18	4	13239	4.8845	5.1852e-07	SLC44A4
ENSG00000213654	6	32158543	32163300	6	2	13239	4.8826	5.2345e-07	GPSM3
ENSG00000031081	3	119013220	119139561	83	21	13239	4.8575	5.9447e-07	ARHGAP31
ENSG00000204420	6	31686371	31694491	11	4	13239	4.844	6.3634e-07	C6orf25
ENSG00000204256	6	32936437	32949282	17	7	13239	4.8306	6.8059e-07	BRD2
ENSG00000108306	17	37415384	37558776	44	3	13239	4.8295	6.8426e-07	FBXL20
ENSG00000161847	19	10426888	10444316	7	3	13239	4.8197	7.1873e-07	RAVER1
ENSG00000111321	12	6484211	6500733	4	1	13239	4.8079	7.6277e-07	LTBR
ENSG00000185130	6	27775257	27775709	1	1	13239	4.7923	8.2431e-07	HIST1H2BL
ENSG00000233822	6	27806323	27823487	12	2	13239	4.755	9.9247e-07	HIST1H2BN
ENSG00000204310	6	32135989	32145873	10	5	13239	4.7502	1.0163e-06	AGPAT1
ENSG00000152611	5	35904397	35938881	24	5	13239	4.738	1.0791e-06	CAPSL
ENSG00000125686	17	37560538	37607539	9	2	13239	4.7117	1.2283e-06	MED1
ENSG00000213186	3	160150233	160203561	17	3	13239	4.6529	1.6364e-06	TRIM59
ENSG00000213722	6	31694815	31698394	3	1	13239	4.6397	1.7446e-06	DDAH2
ENSG00000168685	5	35852797	35879705	23	4	13239	4.6391	1.7496e-06	IL7R
ENSG00000184357	6	27834570	27835359	1	1	13239	4.6205	1.9142e-06	HIST1H1B
ENSG00000113810	3	160117062	160152750	11	3	13239	4.6124	1.9904e-06	SMC4
ENSG00000164037	4	103806205	103940896	28	3	13239	4.5813	2.3107e-06	SLC9B1
ENSG00000204231	6	33161365	33168630	5	1	13239	4.5771	2.3574e-06	RXRB
ENSG00000248710	3	159945241	160167617	51	6	13239	4.5763	2.3664e-06	RP11-432B6.3
ENSG00000131748	17	37793318	37819737	12	3	13239	4.5736	2.3973e-06	STARD3
ENSG00000204542	6	31079000	31080336	5	2	13239	4.5724	2.4103e-06	C6orf15
ENSG00000142453	19	10982189	11033453	15	3	13239	4.5482	2.7047e-06	CARM1
ENSG00000130733	19	11033444	11039357	1	1	13239	4.5421	2.7843e-06	YIPF2

## Sheet: Supplementary Table S10
Supplementary Table S10 Perform multi-marker analysis on the UWP genome using MAGMA.
GENE	CHR	START	STOP	NSNPS	NPARAM	N	ZSTAT	P	SYMBOL
ENSG00000004534	3	49977440	50137478	264	14	459915	7.7505	4.5761e-15	RBM6
ENSG00000164076	3	49895421	49907655	17	4	459915	7.5885	1.6186e-14	CAMKV
ENSG00000109919	11	47638867	47664175	30	10	459915	7.4519	4.5985e-14	MTCH2
ENSG00000176953	16	28962128	28978418	18	6	459915	7.3198	1.2421e-13	NFATC2IP
ENSG00000165476	10	65281123	65384883	241	23	459915	7.3171	1.2666e-13	REEP3
ENSG00000003756	3	50126341	50156454	29	6	459915	7.2883	1.5699e-13	RBM5
ENSG00000109920	11	47738072	47788995	89	12	459915	7.2786	1.6862e-13	FNBP4
ENSG00000030066	11	47799639	47870107	124	13	459915	7.2615	1.9139e-13	NUP160
ENSG00000149187	11	47487496	47587121	119	23	459915	7.2547	2.0133e-13	CELF1
ENSG00000164077	3	49946302	49967606	28	8	459915	7.254	2.0233e-13	MON1A
ENSG00000164078	3	49924435	49941299	23	5	459915	7.2395	2.2517e-13	MST1R
ENSG00000196296	16	28889726	28915830	28	5	459915	7.2232	2.5385e-13	ATP2A1
ENSG00000176095	3	49761727	49823975	93	11	459915	7.1922	3.1881e-13	IP6K1
ENSG00000183763	3	49866034	49894007	38	6	459915	7.1873	3.3042e-13	TRAIP
ENSG00000169682	16	28985542	28995869	15	6	459915	7.1368	4.7751e-13	SPNS1
ENSG00000164068	3	49726932	49758962	51	10	459915	7.1188	5.4454e-13	RNF123
ENSG00000228008	3	49941278	49954370	13	4	459915	7.0588	8.3976e-13	CTD-2330K9.3
ENSG00000140718	16	53737875	54155853	1306	111	459915	6.9427	1.9227e-12	FTO
ENSG00000196782	4	140637907	141075338	1079	112	459915	6.9026	2.5526e-12	MAML3
ENSG00000177455	16	28943260	28950667	7	4	459915	6.8988	2.6226e-12	CD19
ENSG00000099308	19	18208603	18262502	172	17	459915	6.8881	2.8269e-12	MAST3
ENSG00000165923	11	47681143	47736941	98	13	459915	6.8644	3.3379e-12	AGBL2
ENSG00000066336	11	47376411	47400127	65	9	459915	6.8375	4.0291e-12	SPI1
ENSG00000213658	16	28996147	29002104	8	4	459915	6.8279	4.3096e-12	LAT
ENSG00000172247	11	47611216	47616211	6	4	459915	6.8165	4.6651e-12	C1QTNF4
ENSG00000177548	16	28915742	28947847	33	8	459915	6.7938	5.4626e-12	RABEP2
ENSG00000154415	7	113516832	113715975	369	14	459915	6.7792	6.0428e-12	PPP1R3A
ENSG00000158406	6	26281283	26285762	13	4	459915	6.779	6.0525e-12	HIST1H4H
ENSG00000165915	11	47428683	47438047	21	5	459915	6.7358	8.1514e-12	SLC39A13
ENSG00000178188	16	28857921	28885526	47	4	459915	6.6837	1.1646e-11	SH2B1
ENSG00000158321	7	69063905	70258054	2453	84	459915	6.5965	2.1053e-11	AUTS2
ENSG00000168488	16	28834356	28848558	27	3	459915	6.578	2.3833e-11	ATXN2L
ENSG00000165916	11	47440320	47447993	13	4	459915	6.4354	6.1594e-11	PSMC3
ENSG00000173531	3	49721380	49726934	7	3	459915	6.432	6.2971e-11	MST1
ENSG00000178952	16	28853732	28857729	7	2	459915	6.4272	6.5007e-11	TUFM
ENSG00000187492	3	49828165	49837268	17	7	459915	6.3391	1.1557e-10	CDHR4
ENSG00000054282	1	243419320	243663394	427	35	459915	6.3237	1.2771e-10	SDCCAG8
ENSG00000184730	16	28505970	28510291	10	3	459915	6.2985	1.5028e-10	APOBR
ENSG00000141452	18	21083473	21111746	37	5	459915	6.2861	1.6275e-10	C18orf8
ENSG00000188603	16	28477983	28506896	30	5	459915	6.2717	1.7857e-10	CLN3
ENSG00000261832	16	28477974	28503333	25	4	459915	6.262	1.9002e-10	CLN3
ENSG00000171988	10	64926981	65225722	617	24	459915	6.2533	2.0097e-10	JMJD1C
ENSG00000078403	10	21823094	22032559	180	29	459915	6.2193	2.4966e-10	MLLT10
ENSG00000141458	18	21086148	21166862	114	9	459915	6.1892	3.0236e-10	NPC1
ENSG00000255524	16	28648975	28670003	3	2	459915	6.1789	3.2265e-10	NPIPB8
ENSG00000176476	16	28565236	28603111	88	12	459915	6.1687	3.4422e-10	CCDC101
ENSG00000213619	11	47586888	47606114	22	8	459915	6.1237	4.5726e-10	NDUFS3
ENSG00000105647	19	18263928	18281350	35	8	459915	6.0445	7.4924e-10	PIK3R2
ENSG00000197165	16	28603264	28608430	23	6	459915	6.0405	7.6812e-10	SULT1A2
ENSG00000121753	1	32192718	32230494	38	8	459915	6.0387	7.7675e-10	BAI2
ENSG00000111058	12	81331594	81650533	984	34	459915	6.0358	7.9103e-10	ACSS3
ENSG00000134532	12	23682440	24103966	1021	109	459915	6.0233	8.5441e-10	SOX5
ENSG00000197272	16	28510683	28523372	23	5	459915	5.9676	1.2037e-09	IL27
ENSG00000173068	9	16409501	16870841	1444	85	459915	5.9122	1.6875e-09	BNC2
ENSG00000001617	3	50192478	50226508	63	10	459915	5.8564	2.365e-09	SEMA3F
ENSG00000143537	1	155023042	155035252	21	7	459915	5.7979	3.3572e-09	ADAM15
ENSG00000149084	11	43577986	43878167	624	32	459915	5.7934	3.4478e-09	HSD17B12
ENSG00000268173	19	18263968	18288927	56	11	459915	5.7883	3.5554e-09	PIK3R2
ENSG00000174579	3	135867764	135916083	52	13	459915	5.7821	3.6891e-09	MSL2
ENSG00000198700	1	201798269	201853422	94	16	459915	5.7808	3.7175e-09	IPO9
ENSG00000164061	3	49591922	49708978	163	16	459915	5.7525	4.3964e-09	BSN
ENSG00000105650	19	18318771	18366229	123	15	459915	5.7446	4.606e-09	PDE4C
ENSG00000134571	11	47352957	47374253	43	12	459915	5.6955	6.1521e-09	MYBPC3
ENSG00000183166	7	71244476	71912136	1929	68	459915	5.685	6.5412e-09	CALN1
ENSG00000148572	10	64893050	64914783	40	9	459915	5.6595	7.5909e-09	NRBF2
ENSG00000163935	3	52937588	53080766	284	17	459915	5.6459	8.2171e-09	SFMBT1
ENSG00000196502	16	28616903	28634946	60	7	459915	5.6449	8.2645e-09	SULT1A1
ENSG00000144460	2	226265364	226518734	443	40	459915	5.6306	8.9794e-09	NYAP2
ENSG00000149295	11	113280318	113346413	172	23	459915	5.6188	9.6141e-09	DRD2
ENSG00000105402	19	47990894	48018497	39	7	459915	5.6073	1.0275e-08	NAPA
ENSG00000105662	19	18794487	18893004	260	29	459915	5.5938	1.1111e-08	CRTC1
ENSG00000082258	2	135675805	135716912	75	7	459915	5.5668	1.2973e-08	CCNT2
ENSG00000196821	6	34555065	34664636	214	18	459915	5.562	1.3336e-08	C6orf106
ENSG00000118162	19	47978401	47987525	10	5	459915	5.5613	1.3391e-08	KPTN
ENSG00000124562	6	34725183	34741571	52	8	459915	5.5292	1.6084e-08	SNRPC
ENSG00000145029	3	49460379	49466759	7	4	459915	5.5182	1.7129e-08	NICN1
ENSG00000153086	2	135596117	135659604	105	6	459915	5.5143	1.7505e-08	ACMSD
ENSG00000065060	6	34759857	34850915	240	17	459915	5.5112	1.7817e-08	UHRF1BP1
ENSG00000205683	14	73086004	73360809	786	64	459915	5.5021	1.8764e-08	DPF3
ENSG00000114861	3	71003844	71633140	1302	118	459915	5.483	2.0914e-08	FOXP1
ENSG00000184445	12	123011793	123110943	164	17	459915	5.4501	2.5172e-08	KNTC1
ENSG00000198892	1	201857808	201861434	7	3	459915	5.4333	2.7656e-08	SHISA4
ENSG00000182179	3	49842640	49851379	8	2	459915	5.4329	2.7727e-08	UBA7
ENSG00000272573	3	52867130	52869235	8	3	459915	5.4311	2.8006e-08	MUSTN1
ENSG00000272305	3	53003135	53133469	310	18	459915	5.4293	2.8281e-08	RP11-894J14.5
ENSG00000055955	3	52846991	52865495	45	7	459915	5.4185	3.0046e-08	ITIH4
ENSG00000243696	3	52847298	52869745	62	8	459915	5.4172	3.0278e-08	RP5-966M1.6
ENSG00000175029	10	126676421	126849739	686	65	459915	5.4124	3.1101e-08	CTBP2
ENSG00000008196	6	50786436	50815326	69	13	459915	5.3863	3.596e-08	TFAP2B
ENSG00000222005	2	47043807	47049796	18	5	459915	5.3519	4.3529e-08	LINC01118
ENSG00000163933	3	53122499	53164478	97	8	459915	5.3482	4.4423e-08	RFT1
ENSG00000254858	19	18303992	18307758	11	3	459915	5.3411	4.6203e-08	MPV17L2
ENSG00000163950	4	1694527	1714282	50	11	459915	5.338	4.7001e-08	SLBP
ENSG00000135966	2	105880871	105946491	199	26	459915	5.3353	4.7699e-08	TGFBRAP1
ENSG00000158373	6	26158349	26171577	15	5	459915	5.3248	5.0531e-08	HIST1H2BD
ENSG00000119878	2	46843555	46852881	20	6	459915	5.3059	5.6046e-08	CRIPT
ENSG00000118007	3	136055077	136471220	609	25	459915	5.2926	6.0293e-08	STAG1
ENSG00000164062	3	49711435	49721396	8	3	459915	5.2882	6.1767e-08	APEH
ENSG00000130779	12	122755979	122907179	242	21	459915	5.2336	8.312e-08	CLIP1
ENSG00000145022	3	49449639	49453908	7	3	459915	5.2206	8.9179e-08	TCTA
ENSG00000248592	3	52867137	52931578	129	11	459915	5.2159	9.1473e-08	TMEM110-MUSTN1
ENSG00000090621	1	40026488	40042462	34	9	459915	5.1999	9.972e-08	PABPC4
ENSG00000106536	7	39017598	39532694	1469	66	459915	5.199	1.0018e-07	POU6F2
ENSG00000113448	5	58264865	59817947	3681	152	459915	5.1878	1.0638e-07	PDE4D
ENSG00000213533	3	52870235	52931612	118	10	459915	5.1795	1.1125e-07	TMEM110
ENSG00000078328	16	6069095	7763340	10056	452	459915	5.1564	1.2585e-07	RBFOX1
ENSG00000167397	16	31102163	31107301	8	3	459915	5.154	1.2746e-07	VKORC1
ENSG00000101019	20	33890369	33999944	170	10	459915	5.1464	1.3278e-07	UQCC1
ENSG00000176124	13	50656307	51297372	1536	89	459915	5.1301	1.4479e-07	DLEU1
ENSG00000166167	10	103113820	103317078	396	15	459915	5.1075	1.6324e-07	BTRC
ENSG00000149292	11	113185251	113254266	138	18	459915	5.1044	1.659e-07	TTC12
ENSG00000118156	19	48023942	48059113	37	9	459915	5.0989	1.7084e-07	ZNF541
ENSG00000233276	3	49394609	49396033	2	1	459915	5.0893	1.7972e-07	GPX1
ENSG00000163235	2	70674412	70781325	327	36	459915	5.0591	2.1065e-07	TGFA
ENSG00000173402	3	49506146	49573048	105	12	459915	5.0236	2.5353e-07	DAG1
ENSG00000151322	14	33404139	34273382	2751	274	459915	5.0233	2.5398e-07	NPAS3
ENSG00000183715	11	132284871	133402414	3635	273	459915	5.0198	2.5863e-07	OPCML
ENSG00000176697	11	27676440	27743605	107	15	459915	5.0159	2.6389e-07	BDNF
ENSG00000136770	10	22045466	22292698	384	23	459915	5.008	2.7502e-07	DNAJC1
ENSG00000110536	11	47586982	47595013	8	4	459915	5.0009	2.8527e-07	PTPMT1
ENSG00000041515	13	109248500	109860355	2327	153	459915	4.9662	3.4135e-07	MYO16
ENSG00000145020	3	49454211	49460186	9	2	459915	4.964	3.4527e-07	AMT
ENSG00000136448	17	43128978	43186384	170	17	459915	4.9609	3.508e-07	NMT1
ENSG00000163297	4	80822303	81046608	528	33	459915	4.9544	3.6286e-07	ANTXR2
ENSG00000119599	14	73393040	73426411	121	17	459915	4.9446	3.8155e-07	DCAF4
ENSG00000125998	20	33873534	33880204	6	2	459915	4.9202	4.3236e-07	FAM83C
ENSG00000168917	3	136537489	136574734	98	6	459915	4.9195	4.3382e-07	SLC35G2
ENSG00000168936	4	1717679	1723085	25	6	459915	4.9035	4.7074e-07	TMEM129
ENSG00000103510	16	31127075	31142714	24	4	459915	4.8971	4.863e-07	KAT8
ENSG00000168517	17	43238067	43247407	8	3	459915	4.8837	5.2057e-07	HEXIM2
ENSG00000103942	15	83509838	83654661	310	26	459915	4.8746	5.4501e-07	HOMER2
ENSG00000184226	13	66876967	67804468	2119	123	459915	4.8426	6.4076e-07	PCDH9
ENSG00000188529	1	24291294	24307417	5	2	459915	4.8316	6.7706e-07	SRSF10
ENSG00000103496	16	31044210	31054296	18	4	459915	4.8297	6.8359e-07	STX4
ENSG00000167394	16	31072164	31085641	17	3	459915	4.8268	6.9387e-07	ZNF668
ENSG00000153815	16	81478775	81745367	1089	104	459915	4.817	7.2853e-07	CMIP
ENSG00000163431	1	201865580	201915715	117	20	459915	4.8162	7.3148e-07	LMOD1
ENSG00000103044	16	69139467	69152622	21	7	459915	4.8144	7.3806e-07	HAS3
ENSG00000114054	3	135969148	136056738	126	17	459915	4.8136	7.4117e-07	PCCB
ENSG00000125965	20	34021145	34042568	35	8	459915	4.8117	7.4816e-07	GDF5
ENSG00000183092	14	101003486	101053750	123	17	459915	4.8082	7.6149e-07	BEGAIN
ENSG00000242372	20	33866714	33872788	18	2	459915	4.7587	9.7441e-07	EIF6
ENSG00000160469	19	55793440	55823901	86	14	459915	4.7458	1.0382e-06	BRSK1
ENSG00000126215	14	104163946	104181841	31	7	459915	4.7457	1.0389e-06	XRCC3
ENSG00000186350	9	137208944	137332431	414	34	459915	4.7438	1.0485e-06	RXRA
ENSG00000174282	17	7362685	7387582	55	8	459915	4.7327	1.1076e-06	ZBTB4
ENSG00000140043	14	74318547	74353530	134	10	459915	4.7226	1.164e-06	PTGR2
ENSG00000178951	19	4044362	4066943	41	8	459915	4.719	1.1848e-06	ZBTB7A
ENSG00000103507	16	31117428	31124110	7	2	459915	4.7185	1.1879e-06	BCKDK
ENSG00000158092	3	136581050	136668665	194	9	459915	4.7141	1.2139e-06	NCK1
ENSG00000169612	15	83654959	83659809	6	2	459915	4.6952	1.3319e-06	FAM103A1
ENSG00000067560	3	49396578	49450431	87	10	459915	4.6862	1.3913e-06	RHOA
ENSG00000258653	14	74318674	74398981	295	14	459915	4.6758	1.4643e-06	RP5-1021I20.4
ENSG00000114349	3	50229045	50233949	2	1	459915	4.6719	1.4921e-06	GNAT1
ENSG00000112343	6	25963030	25987384	43	13	459915	4.6691	1.5126e-06	TRIM38
ENSG00000132535	17	7093209	7123021	44	9	459915	4.6638	1.5521e-06	DLG4
ENSG00000088298	20	33703167	33865928	358	24	459915	4.6633	1.556e-06	EDEM2
ENSG00000173540	3	49754277	49761384	4	2	459915	4.6611	1.5726e-06	GMPPB
ENSG00000176020	3	49754267	49761349	4	2	459915	4.6611	1.5726e-06	AMIGO3
ENSG00000197846	6	26199748	26200942	10	4	459915	4.653	1.6353e-06	HIST1H2BF
ENSG00000143061	1	117117031	117210375	104	22	459915	4.6497	1.6618e-06	IGSF3
ENSG00000165637	10	76969912	76991206	43	11	459915	4.6415	1.7291e-06	VDAC2
ENSG00000169609	15	83657193	83680393	45	10	459915	4.6237	1.8847e-06	C15orf40
ENSG00000255439	16	31094760	31106277	21	5	459915	4.6178	1.9395e-06	RP11-196G11.1
ENSG00000114646	3	47603729	47622282	23	5	459915	4.6149	1.9661e-06	CSPG5
ENSG00000236104	6	33282183	33285719	4	2	459915	4.6133	1.9813e-06	ZBTB22
ENSG00000121481	1	185014496	185071740	61	14	459915	4.6121	1.9935e-06	RNF2
ENSG00000052344	16	31142756	31147083	5	3	459915	4.61	2.0137e-06	PRSS8
ENSG00000119725	14	74353320	74399214	166	14	459915	4.6069	2.044e-06	ZNF410
ENSG00000204682	10	21781587	21786191	8	3	459915	4.6036	2.0758e-06	CASC10
ENSG00000152944	12	27175479	27219276	124	17	459915	4.5931	2.1833e-06	MED21
ENSG00000175931	17	74385532	74449288	165	21	459915	4.5917	2.1985e-06	UBE2O
ENSG00000165917	11	47459308	47470730	35	6	459915	4.5759	2.3709e-06	RAPSN
ENSG00000103978	15	42502730	42565861	88	13	459915	4.5729	2.4051e-06	TMEM87A
ENSG00000172992	17	43100708	43138473	92	12	459915	4.5714	2.422e-06	DCAKD
ENSG00000159217	17	47074774	47133012	98	16	459915	4.5689	2.4513e-06	IGF2BP1
ENSG00000206535	3	100120037	100175163	81	19	459915	4.5648	2.5003e-06	LNP1
ENSG00000134905	13	111293759	111365950	298	18	459915	4.5606	2.5503e-06	CARS2

[truncated: 26 more sheets: Supplementary Table S11, Supplementary Table S12, Supplementary Table S13, Supplementary Table S14, Supplementary Table S15, Supplementary Table S16, Supplementary Table S17, Supplementary Table S18, Supplementary Table S19, Supplementary Table S20, Supplementary Table S21, Supplementary Table S22, Supplementary Table S23, Supplementary Table S24, Supplementary Table S25, Supplementary Table S26, Supplementary Table S27, Supplementary Table S28, Supplementary Table S29, Supplementary Table S30 …]
